# Supplementary material for: Regioselective and Stereoselective Synthesis of Parthenolide Analogs by Acyl Nitroso-Ene Reaction and Their Biological Evaluation against Mycobacterium tuberculosis
Source: MDPI journal article supplement (doi:10.3390/ijms242417395), 2023-12-12
Supplement: s1 [file s1]

# Regioselective and Stereoselective Synthesis of Parthenolide Analogs by Acyl Nitroso-Ene Reaction and Their Biological Evaluation against *Mycobacterium tuberculosis*

Bruna Gioia <sup>1</sup>, Francesca Ruggieri <sup>1</sup>, Alexandre Biela <sup>1</sup>, Valérie Landry <sup>1</sup>, Pascal Roussel <sup>2</sup>, Catherine Piveteau <sup>1</sup>, Florence Leroux <sup>1</sup>, Ruben C. Hartkoorn <sup>3</sup> and Nicolas Willand <sup>1,\*</sup>

<sup>1</sup> Univ. Lille, Inserm, Institut Pasteur de Lille, U1177—Drugs and Molecules for living Systems, F-59000 Lille, France

<sup>2</sup> Univ. Lille, CNRS, ENSCL, Centrale Lille, Univ. Artois, UMR 8181—UCCS—Unité de Catalyse et de Chimie du Solide, F-59000 Lille, France

<sup>3</sup> Univ. Lille, CNRS, Inserm, CHU Lille, Institut Pasteur de Lille, U1019—UMR 8204—CIIIL—Center for Infection and Immunity of Lille, F-59000 Lille, France

\* Correspondence: nicolas.willand@univ-lille.fr

**Supplementary material**

Table S1. Summary of methodology for nitroso-ene reaction between parthenolide and 1-hydroxy-3-phenyl-urea (**2a**). Reaction was run on 50 mg of parthenolide besides condition S.

|                | Parthenolide (eq.) | 1-hydroxy-3-phenyl-urea (eq.) | Pyridine (eq.)            | H <sub>2</sub> O <sub>2</sub> 30% in H <sub>2</sub> O (eq.) | CuCl (eq.)              | CuI (eq.) | Yield | Time | Conditions                |
|----------------|--------------------|-------------------------------|---------------------------|-------------------------------------------------------------|-------------------------|-----------|-------|------|---------------------------|
| A              | 1                  | 1.1                           | 0.25 <sup>a</sup>         | -                                                           | 0.05                    | -         | 61%   | 48   | Air                       |
| B <sup>1</sup> | 1                  | 1.1                           | 0.125                     | -                                                           | 0.1                     | -         | N.D.  | 24   | Air                       |
| C <sup>1</sup> | 1                  | 1.1                           | 0.25                      | -                                                           | 0.1                     | -         | N.D.  | 24   | Air                       |
| D              | 1                  | 1.1                           | 0.25                      | -                                                           | 0.05                    | -         | 55%   | 48   | Air                       |
| E              | 1                  | 1.5                           | 0.25                      | -                                                           | 0.05                    | -         | 62%   | 24   | Air                       |
| F              | 1                  | 1.1                           | -                         | 0.8                                                         |                         | 0.05      | 32%   | 24   | Air                       |
| G <sup>1</sup> | 1                  | 1.1                           | 0.125 + 0.125 (after 24h) | -                                                           | 0.05 + 0.05 (after 24h) | -         | N.D.  | 48   | Air                       |
| H <sup>1</sup> | 1                  | 1.1                           | 0.1                       | -                                                           | 0.1                     | -         | N.D.  | 48   | Air                       |
| I <sup>1</sup> | 1                  | 1.1                           | -                         | 0.8                                                         | 0.05                    | -         | N.D.  | 48   | Air                       |
| L <sup>2</sup> | 1                  | 1.1                           | 0.125                     | -                                                           | 0.05                    | -         | N.D.  | -    | Microwave irradiation     |
| M              | 1                  | 1.1                           | 0.125                     | -                                                           | 0.05                    | -         | 69%   | 24   | O <sub>2</sub> atmosphere |
| N              | 1                  | 1.5                           | 0.25                      | -                                                           | 0.05                    | -         | 50%   | 24   | O <sub>2</sub> atmosphere |
| O              | 1                  | 1.5                           | 0.125                     | -                                                           | 0.05                    | -         | 80%   | 24   | O <sub>2</sub> atmosphere |
| R <sup>1</sup> | 1                  | 2                             | 0.125                     | -                                                           | 0.05                    | -         | N.D.  | 24   | O <sub>2</sub> atmosphere |
| S <sup>3</sup> | 1                  | 1.1                           | 0.0375                    | -                                                           | 0.01                    | -         | 43%   | 48   | Air                       |

<sup>1</sup> Complex mixture with formation of side compounds, compound **3a** was not isolated. <sup>2</sup> Reaction was run under microwave irradiation ( $\mu$ W) for 45 min at 50°C, then for 1h30at 65 °C but conversion was not total and yield was not calculated, compound **3a** was not isolated. <sup>3</sup> Reaction was run on 500 mg.

## Materials

NMR spectra were recorded on a Bruker® Avance-300 spectrometer (Wissembourg, France). The results were calibrated to signals from the solvent as an internal reference (e.g., 7.26 (residual CDCl<sub>3</sub>) and 77.16 (CDCl<sub>3</sub>) ppm and 2.50 (residual DMSO d<sub>6</sub>) and 39.52 (DMSO d<sub>6</sub>) ppm for <sup>1</sup>H and <sup>13</sup>C NMR spectra, respectively.) Chemical shifts (δ) are in parts per million (ppm) downfield from tetramethylsilane (TMS). The assignments were made using one-dimensional (1D) <sup>1</sup>H and <sup>13</sup>C spectra and two-dimensional (2D) HSQC-DEPT, COSY, and HMBC spectra. NMR coupling constants (J) are reported in hertz (Hz), and splitting patterns are indicated as follows: s (singlet); brs (broad singlet); d (doublet); dd (doublet of doublet); ddd (double of doublet of doublet); dt (doublet of triplet); t (triplet); td (triplet of doublet); q (quartet); m (multiplet).

## NMR spectral data

1-hydroxy-3-phenyl-urea (**2a**)

C<sub>7</sub>H<sub>8</sub>N<sub>2</sub>O<sub>2</sub>

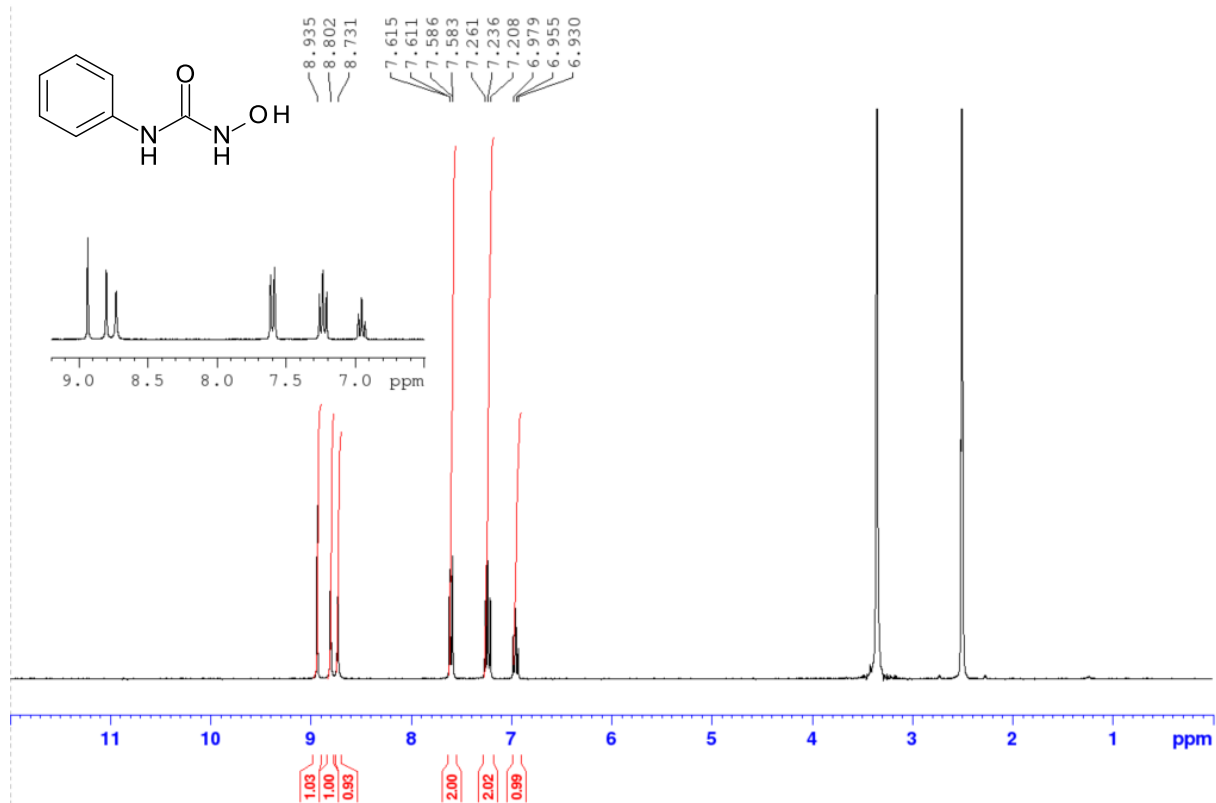

1-hydroxy-3-(p-tolyl)urea (**2b**)  
C<sub>8</sub>H<sub>10</sub>N<sub>2</sub>O<sub>2</sub>

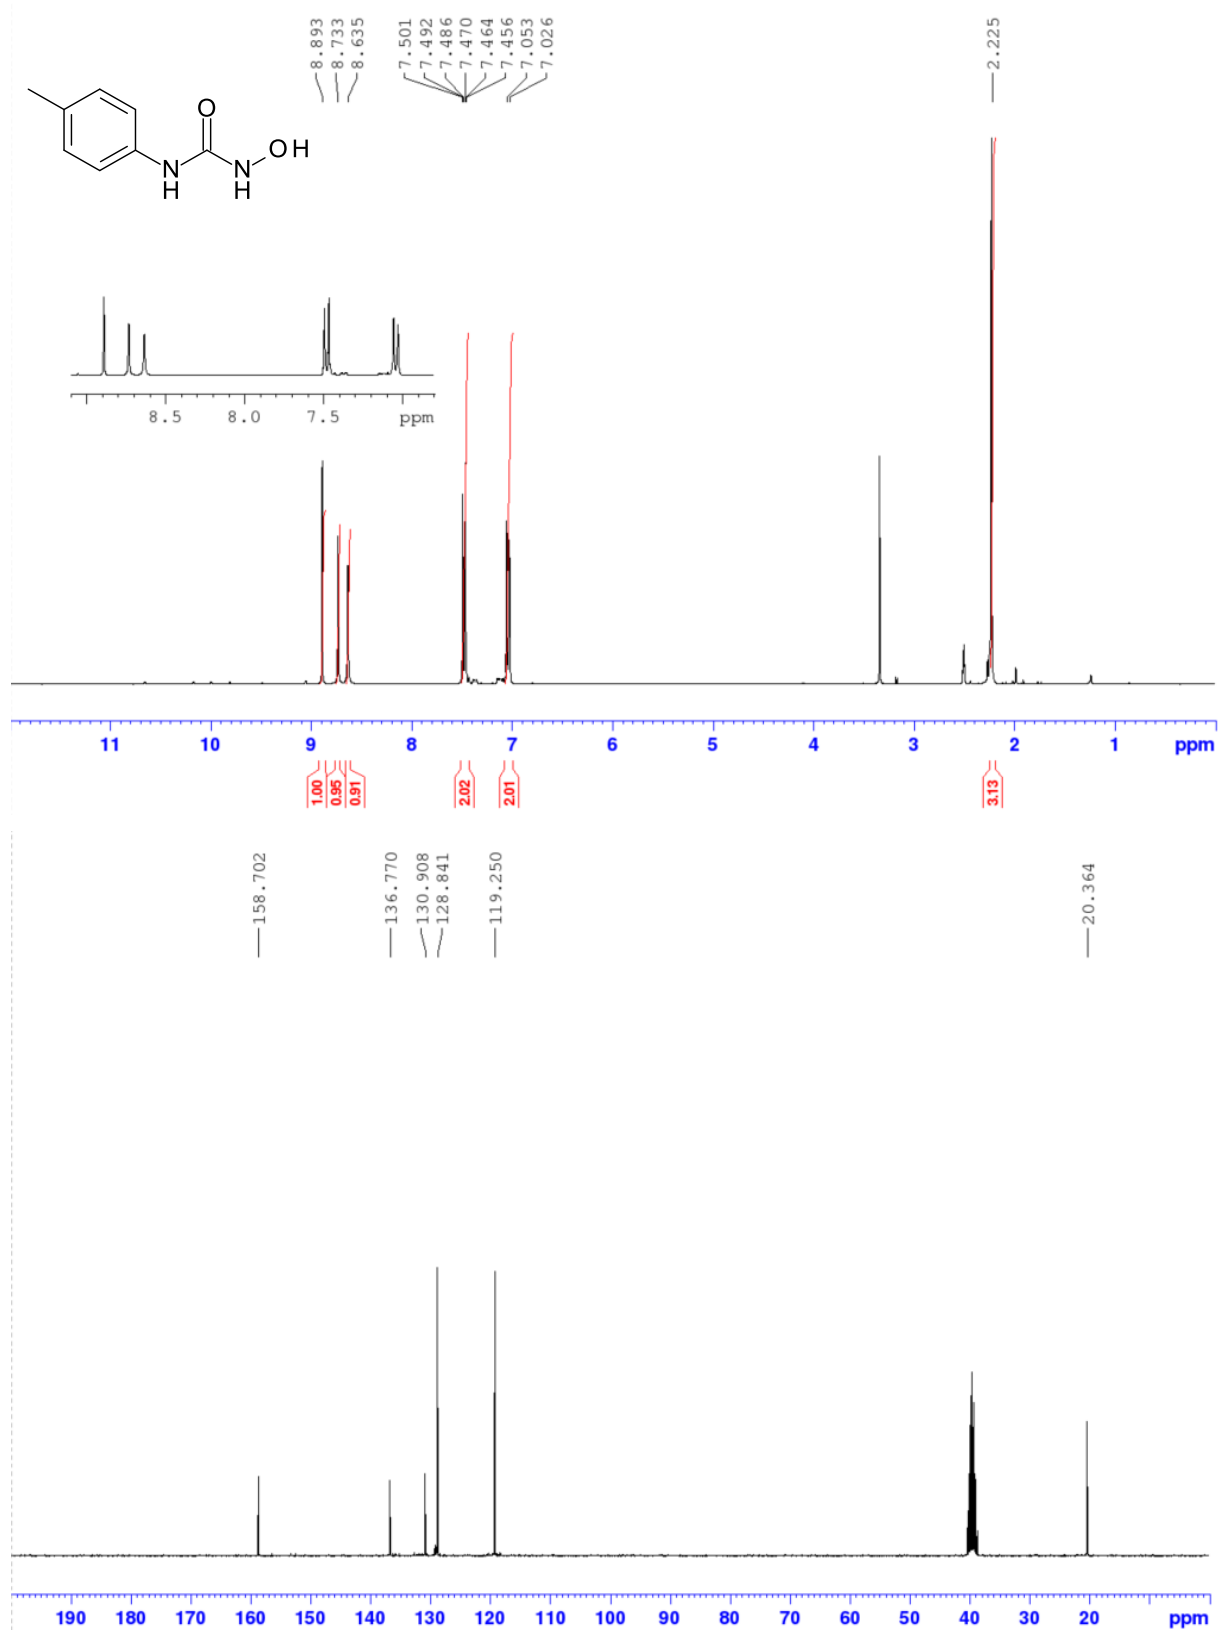

1-benzyl-3-hydroxy-urea (**2c**)

C<sub>8</sub>H<sub>10</sub>N<sub>2</sub>O<sub>2</sub>

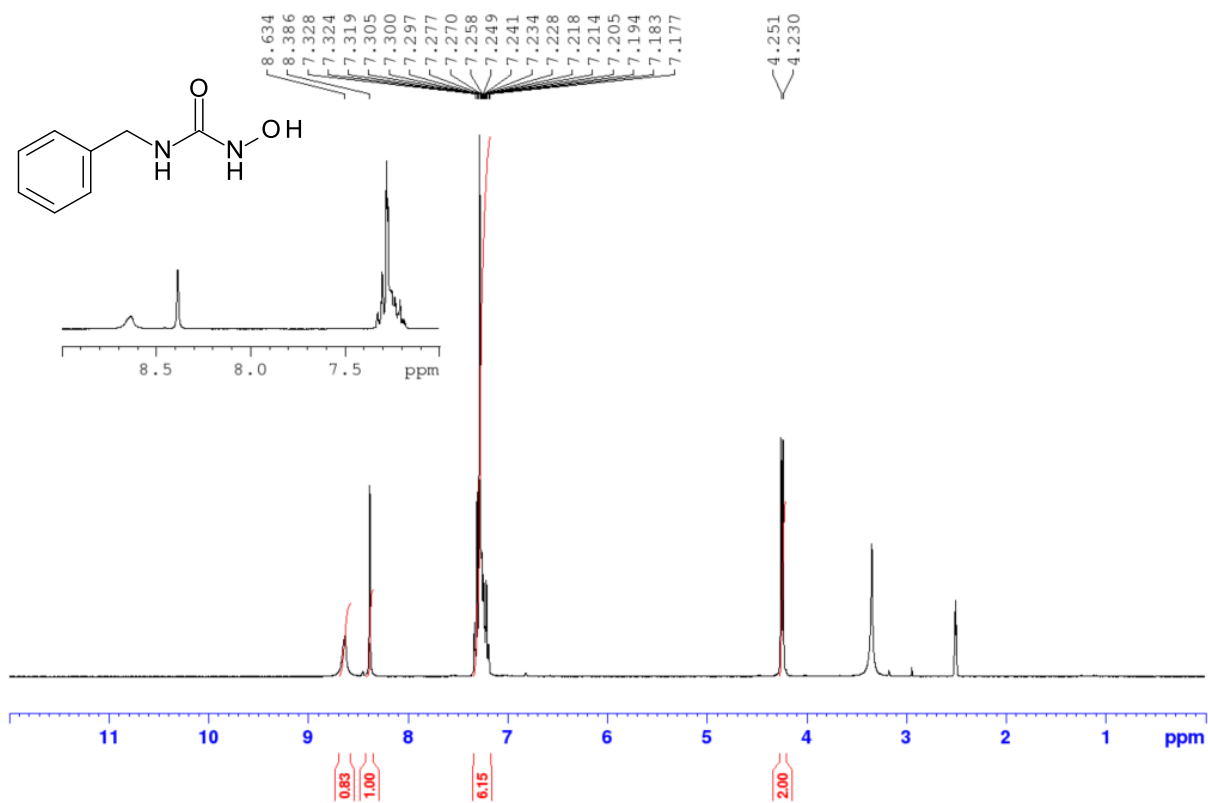

1-hydroxy-3-(4-methoxyphenyl)urea (**2d**)

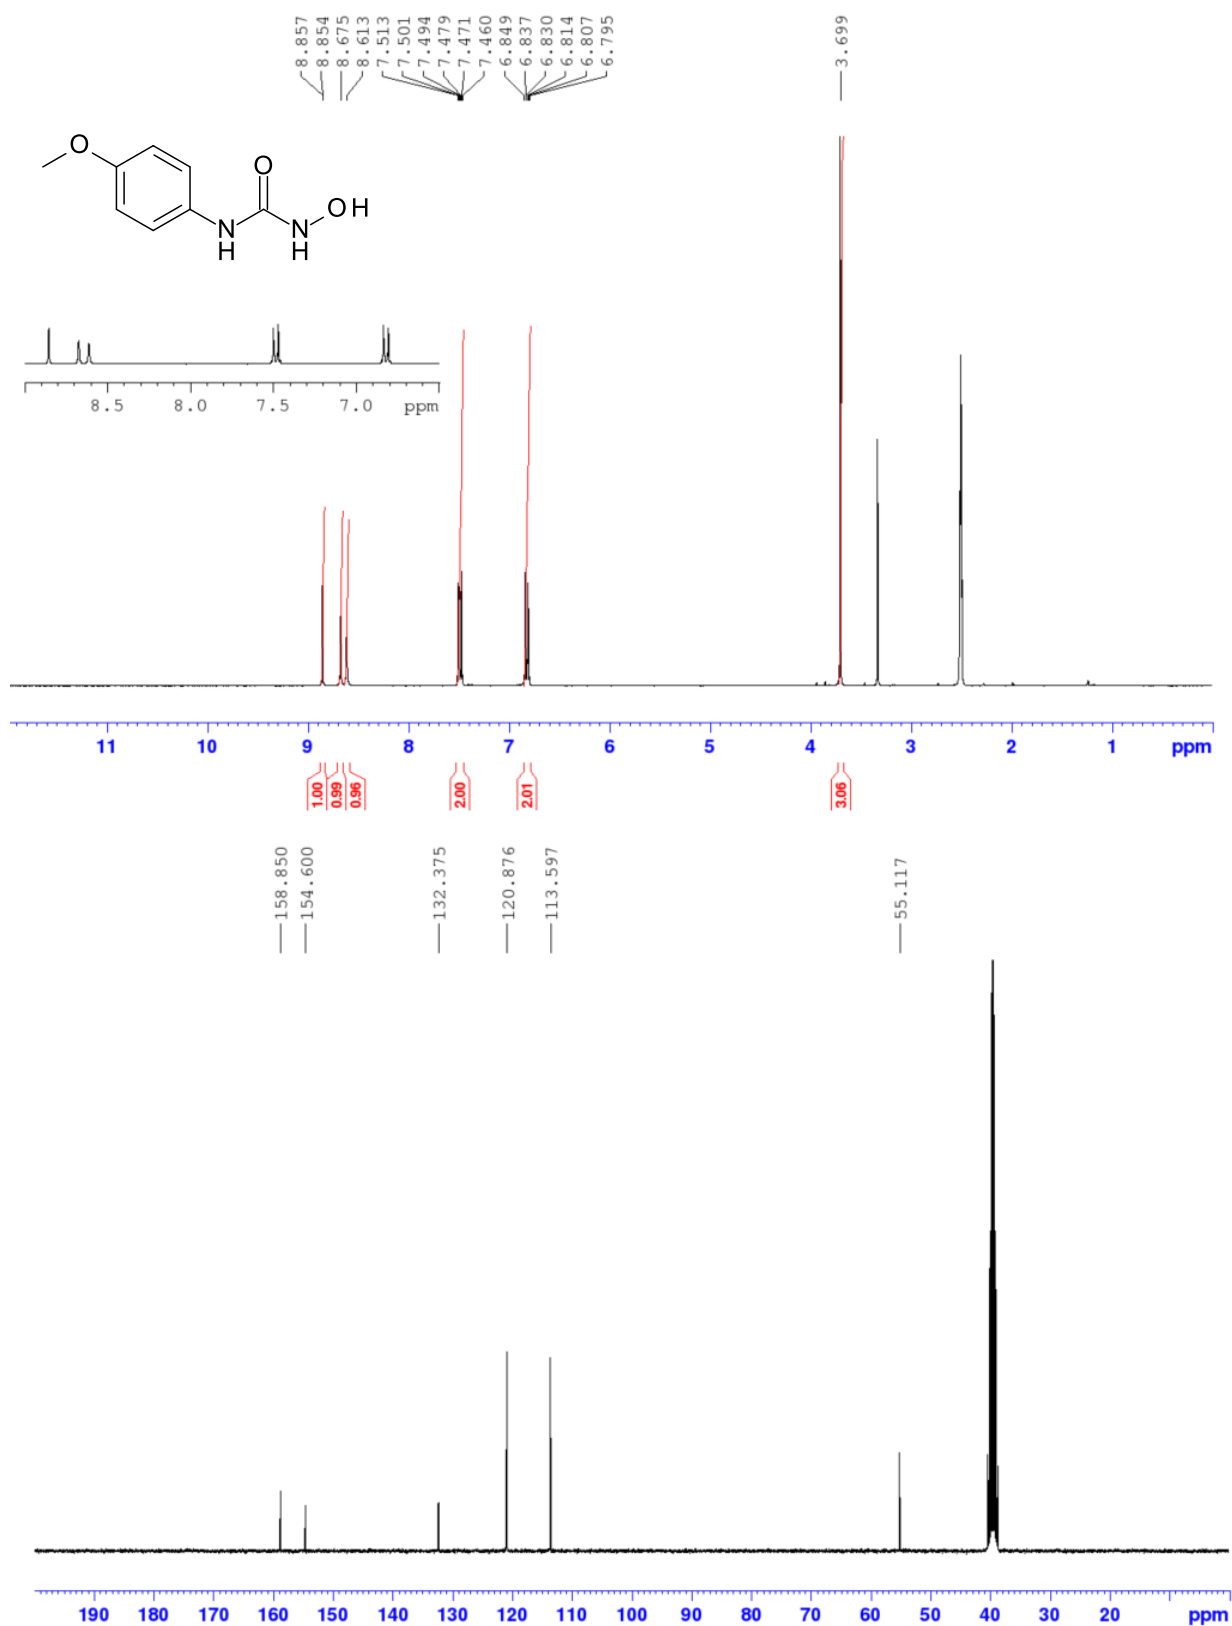

1-(4-fluorophenyl)-3-hydroxy-urea (**2e**)

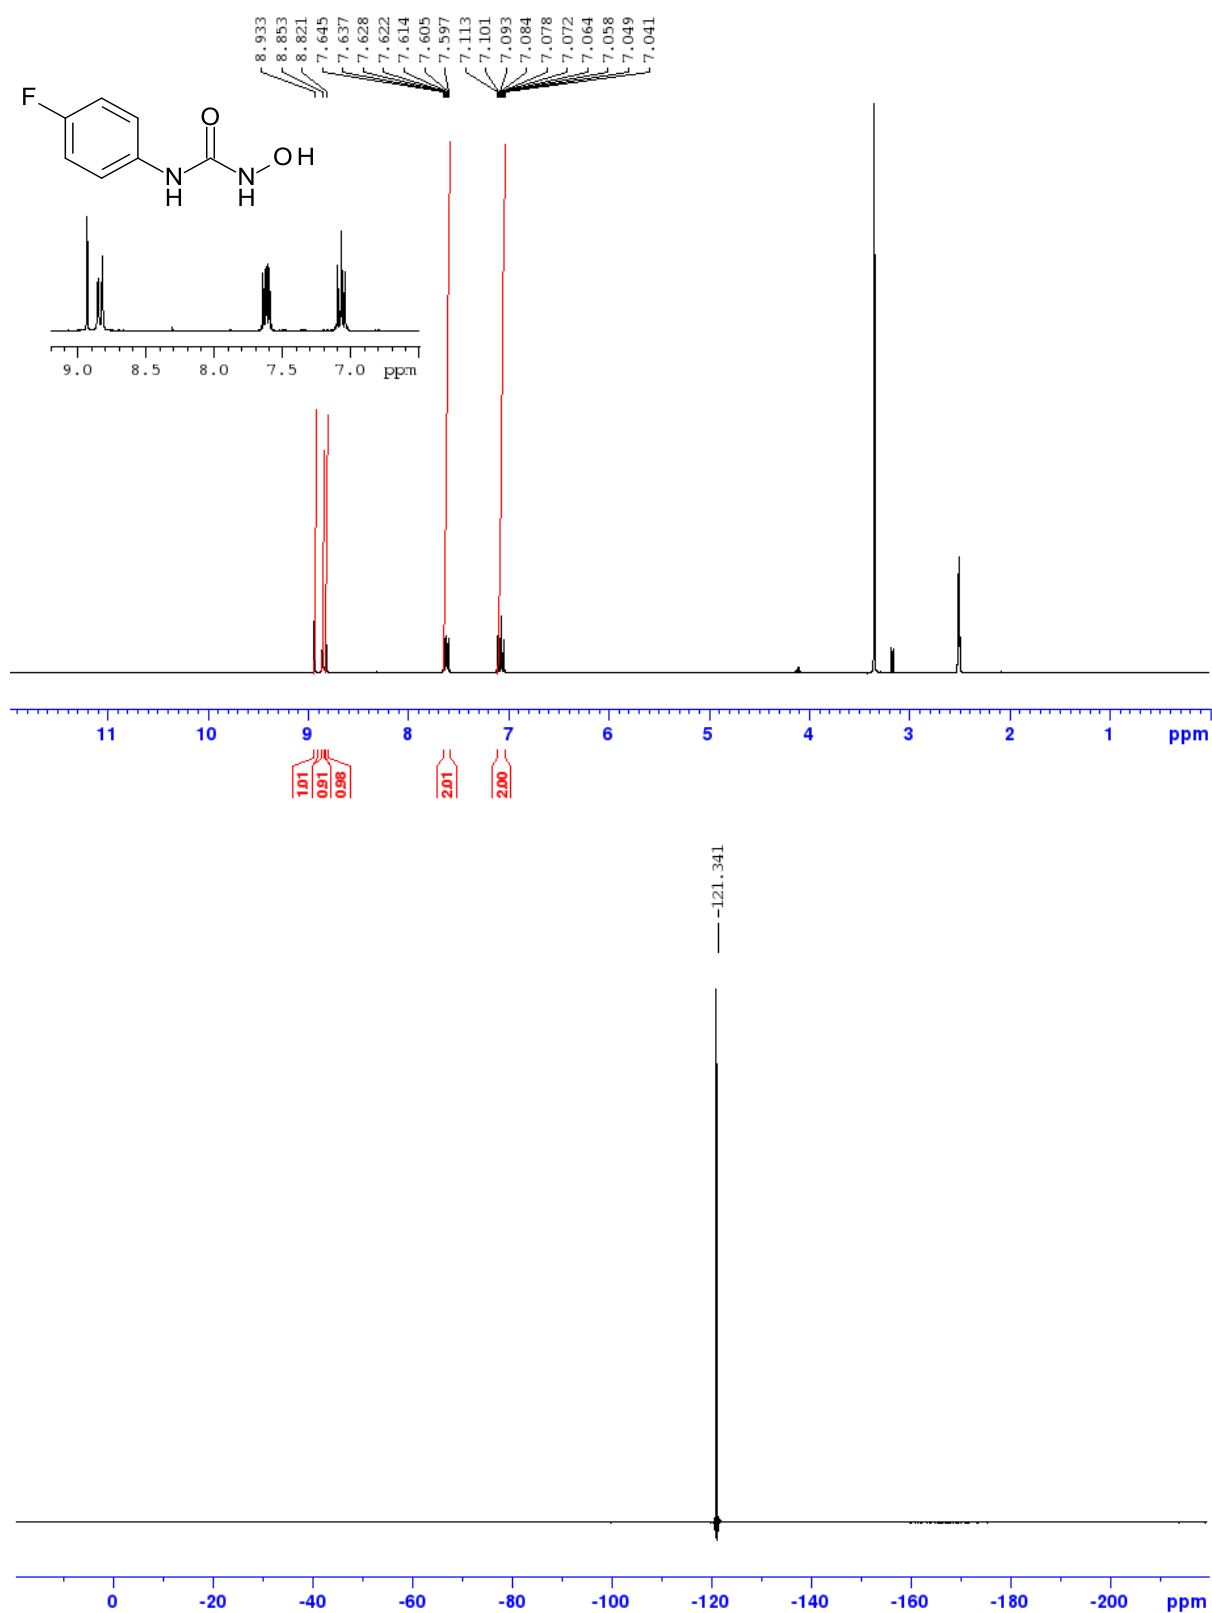



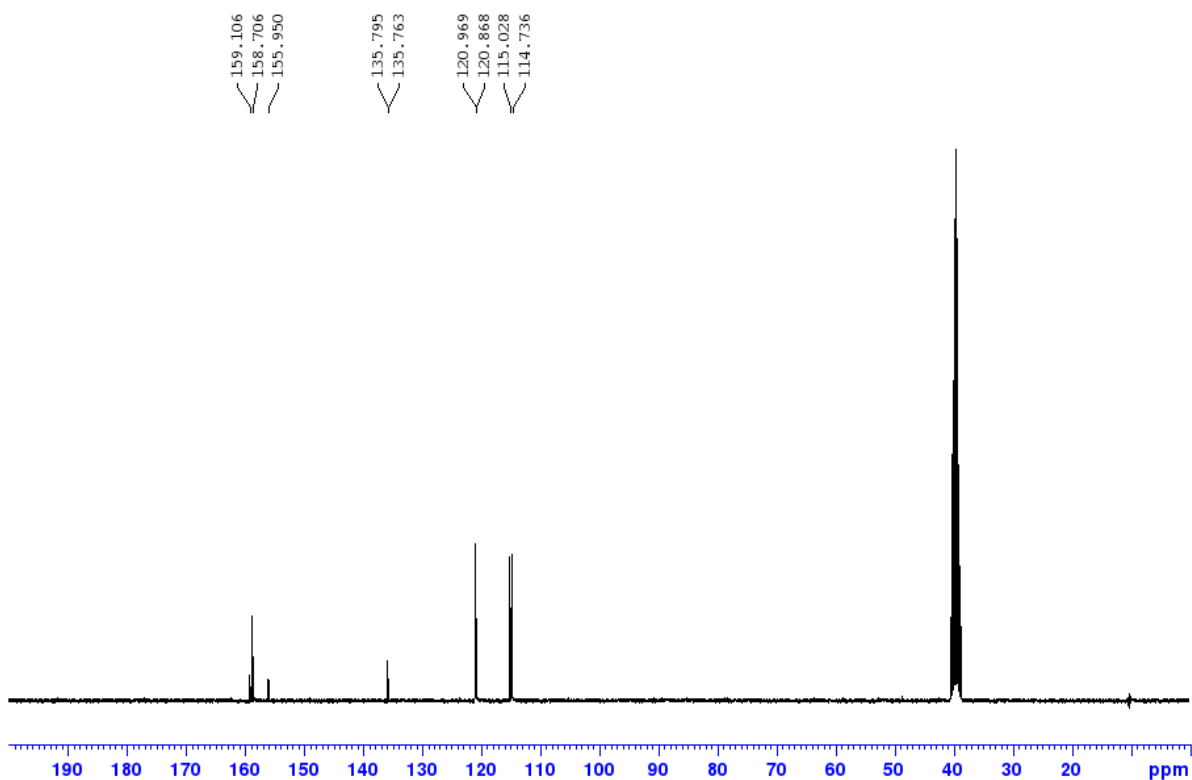

1-(1,3-benzodioxol-5-yl)-3-hydroxy-urea (**2g**)

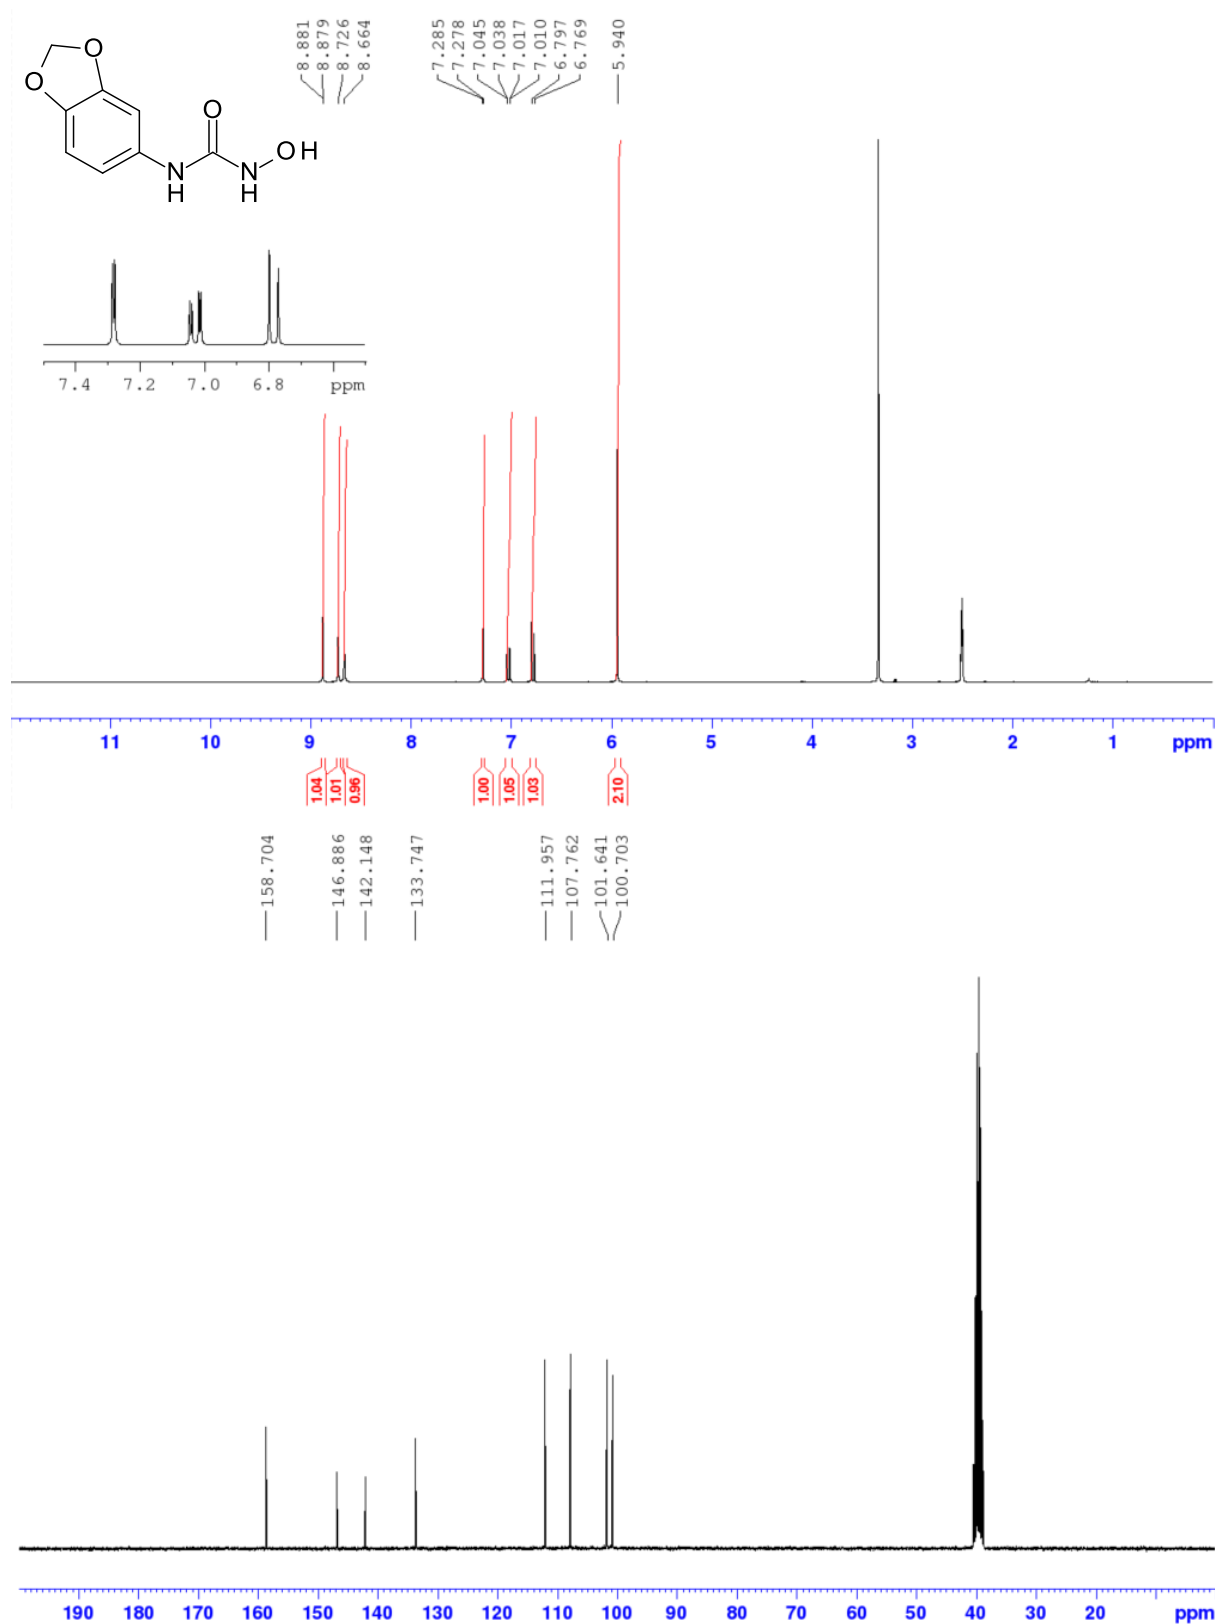

1-(3-ethoxypropyl)-3-hydroxy-urea (**2h**)

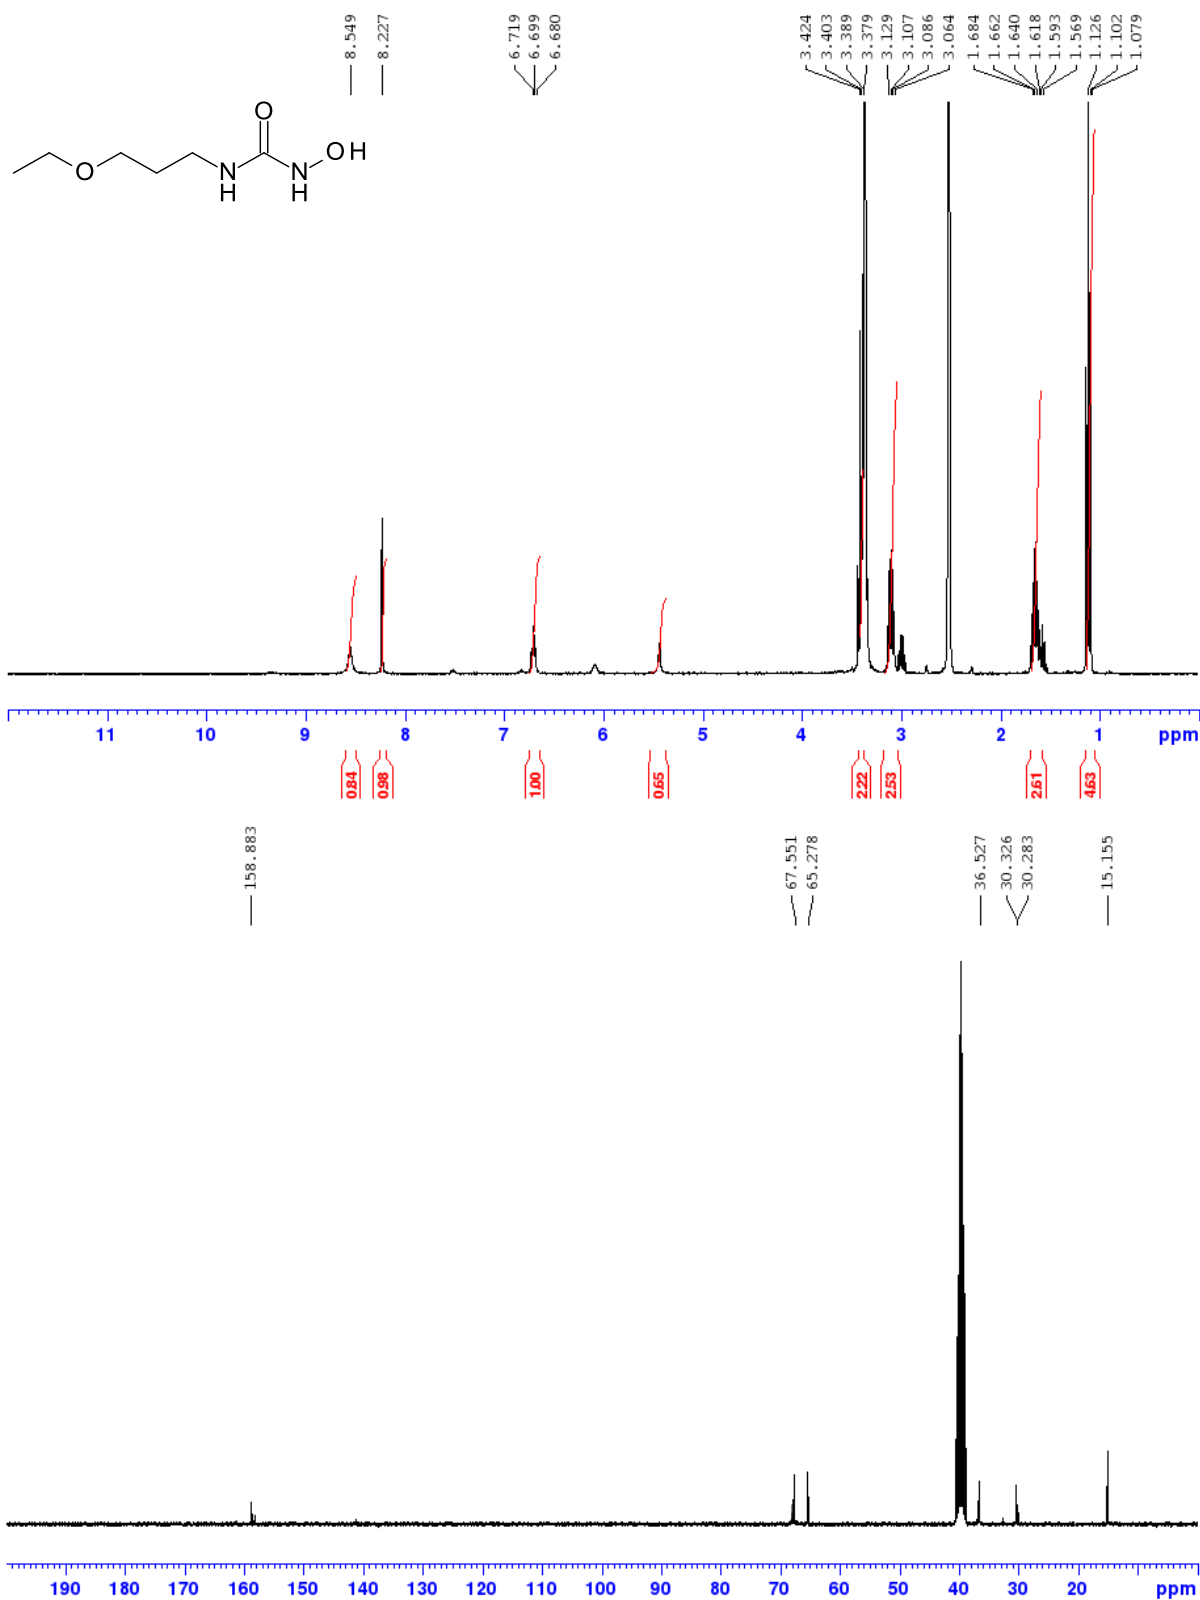

allyl N-hydroxycarbamate (**3b**)[1]

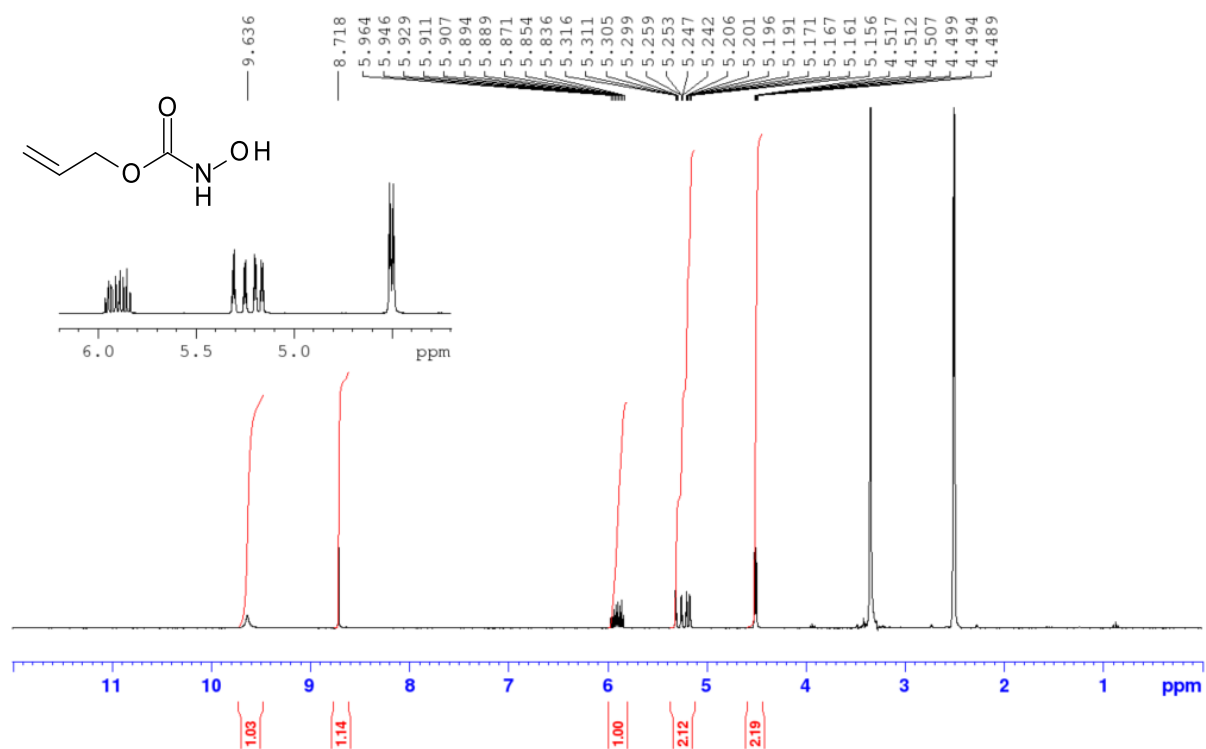

2,2,2-trichloroethyl N-hydroxycarbamate (**3d**)

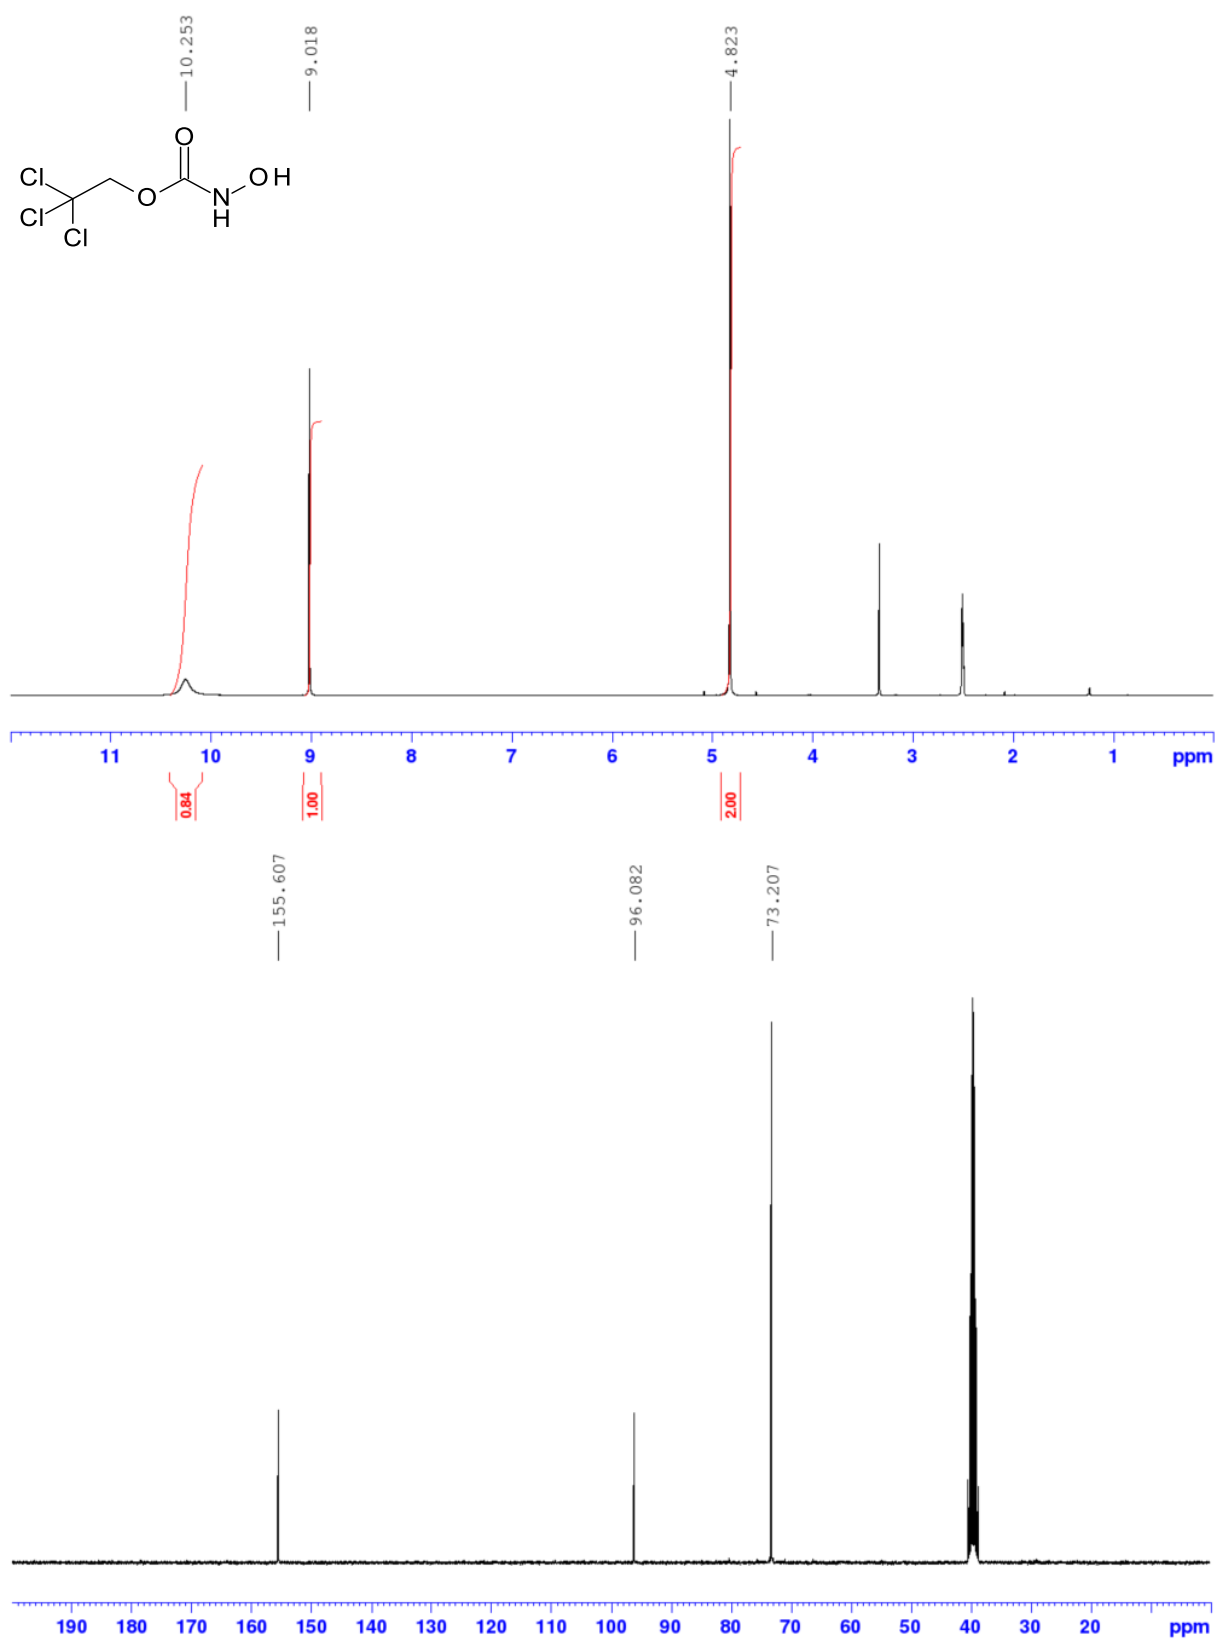

(4-fluorophenyl) N-hydroxycarbamate (**3e**)[2]

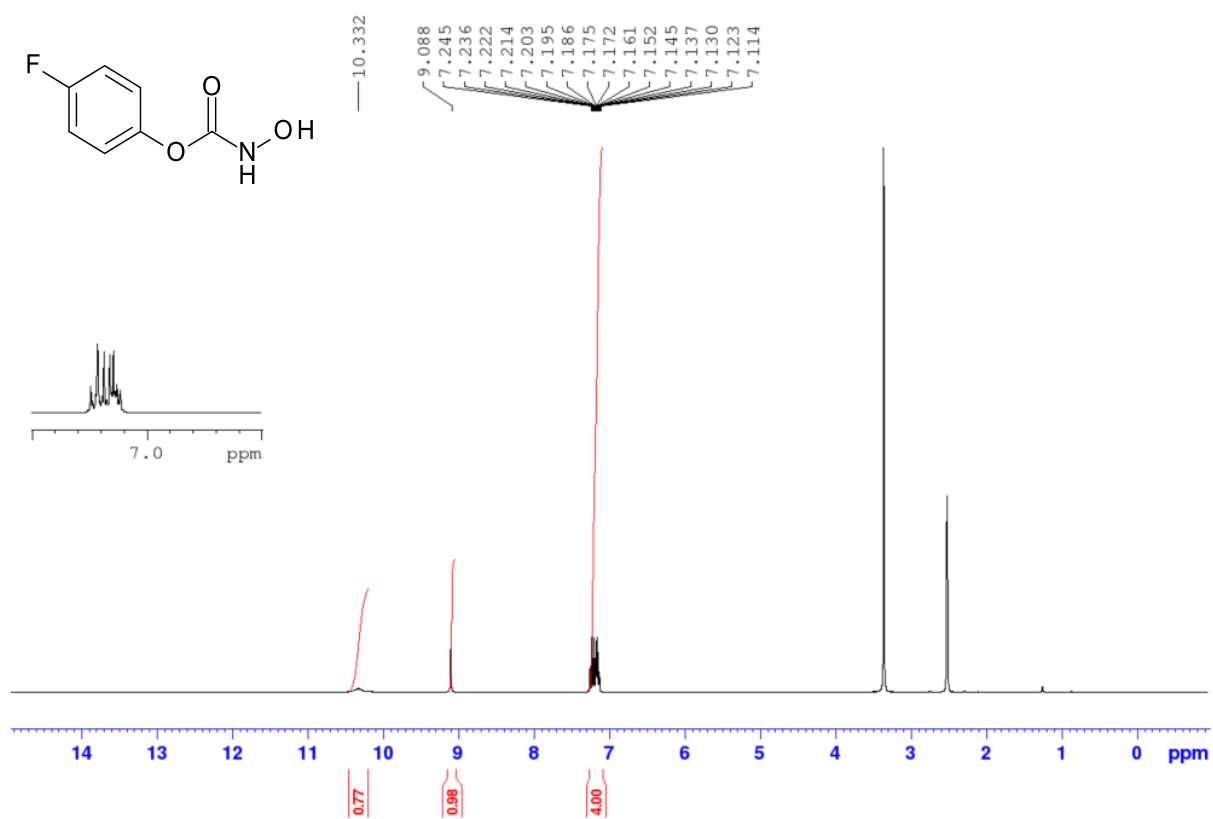

phenyl N-hydroxycarbamate (**3f**) [3]

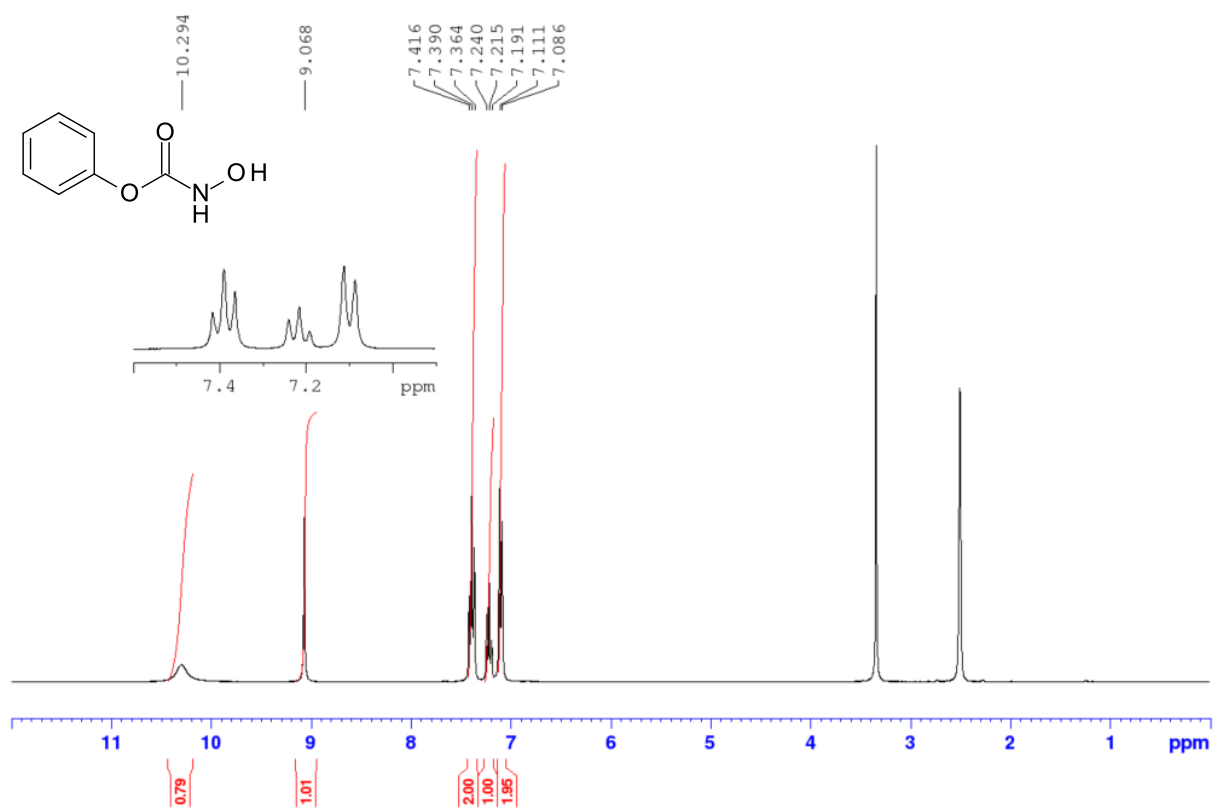

isobutyl N-hydroxycarbamate (**3g**)

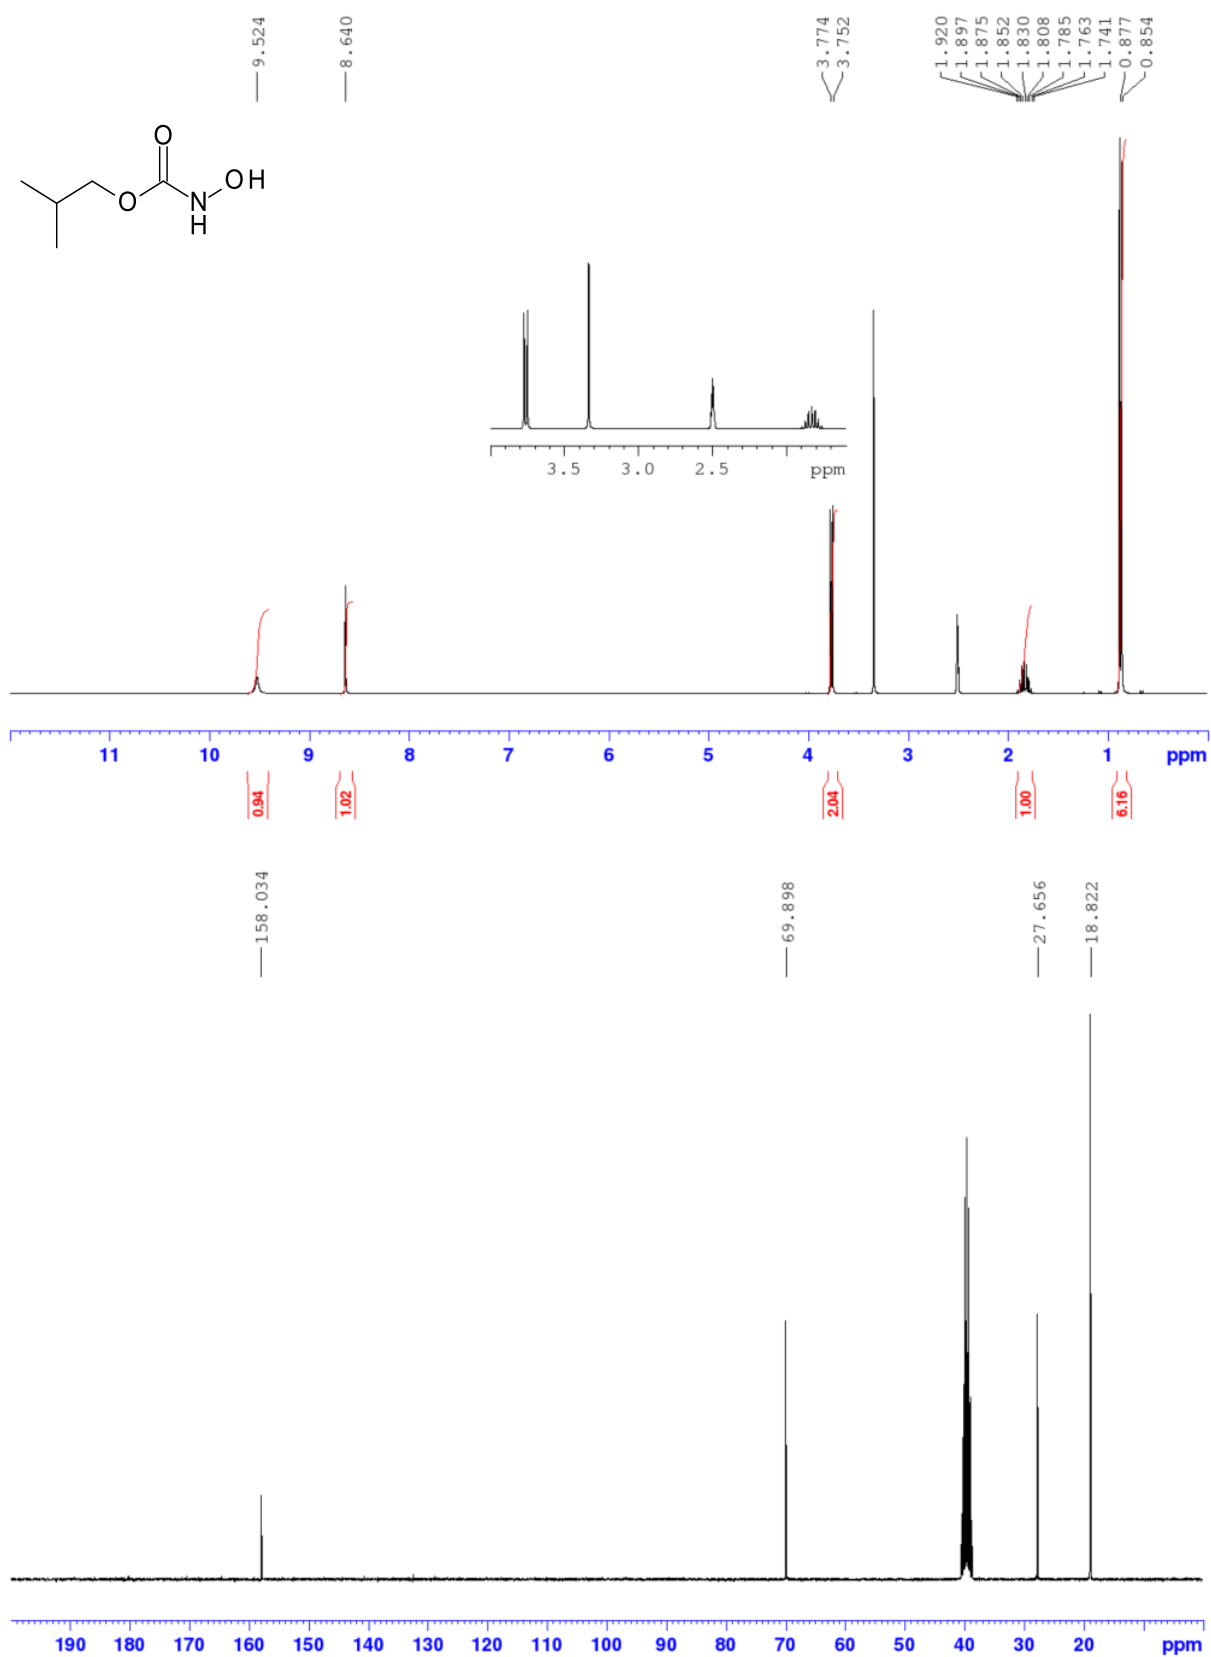



ethyl N-hydroxycarbamate (**3h**)[4]

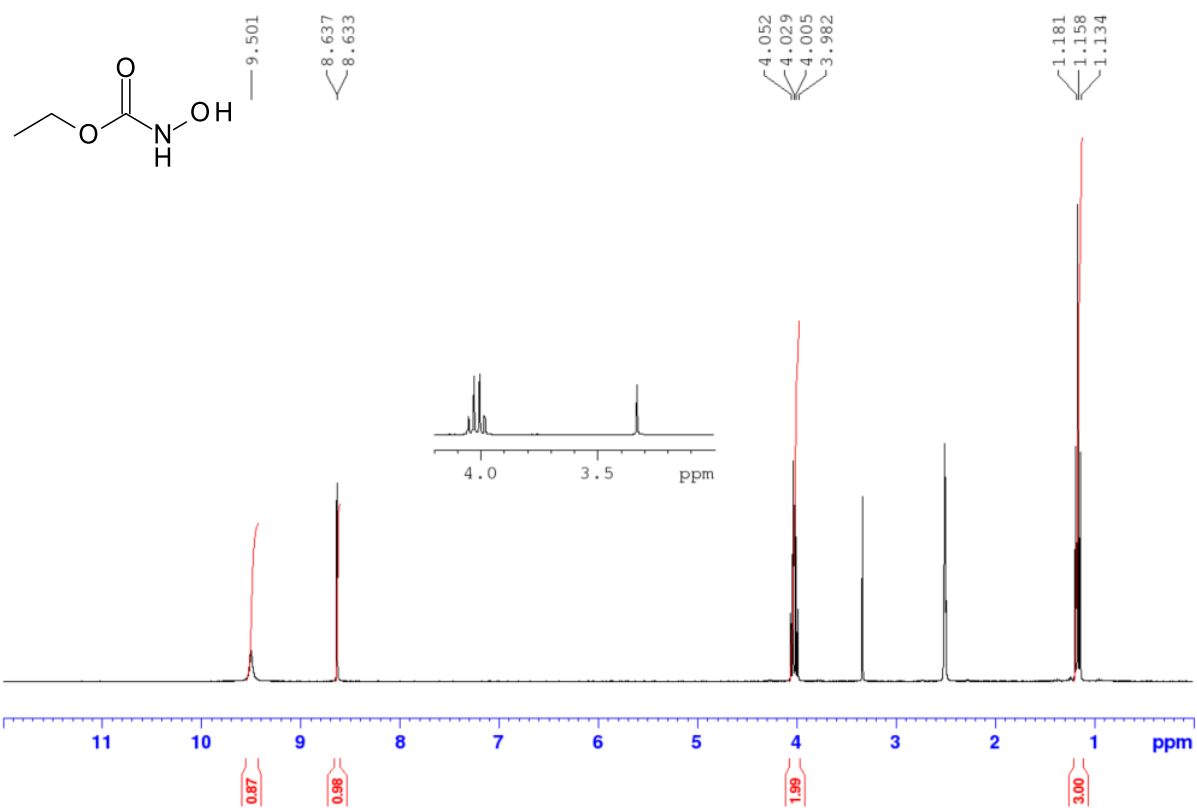

1,3-benzodioxol-5-yl N-hydroxycarbamate (**3i**)

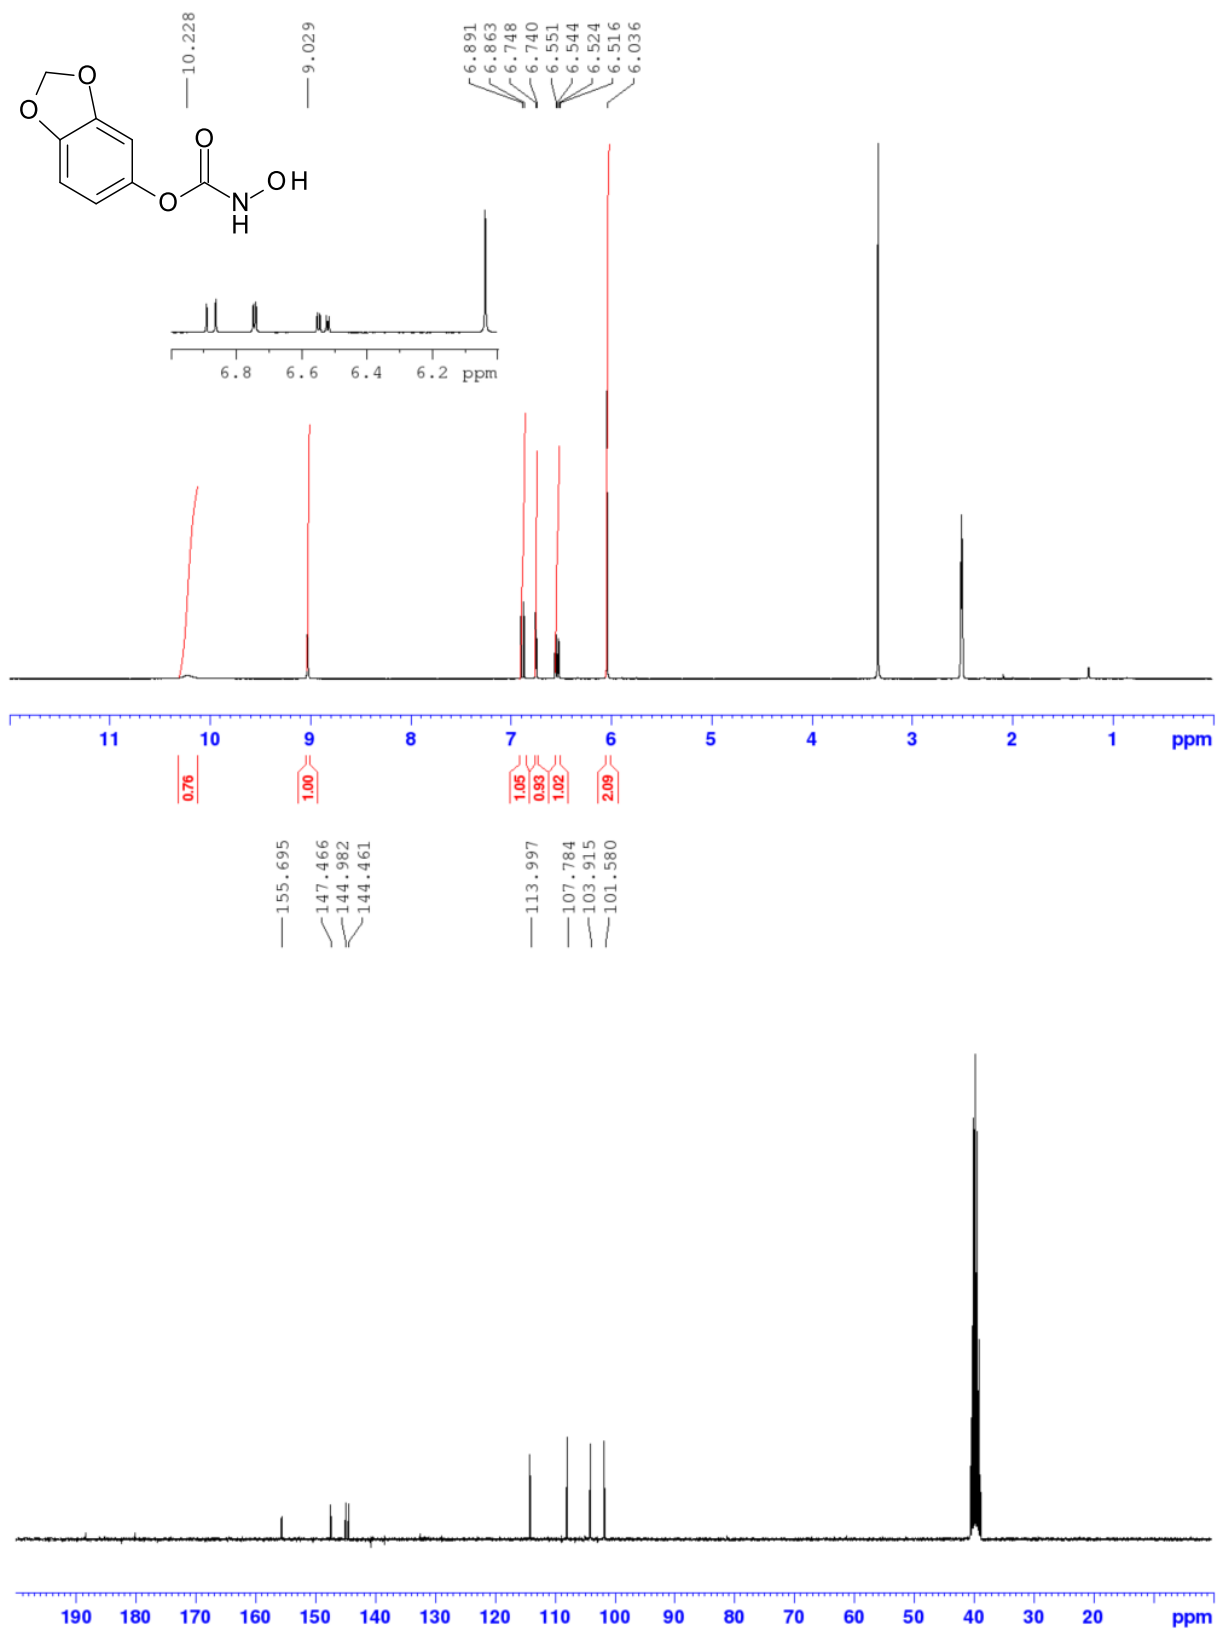

2-methoxyethyl N-hydroxycarbamate (**3j**)

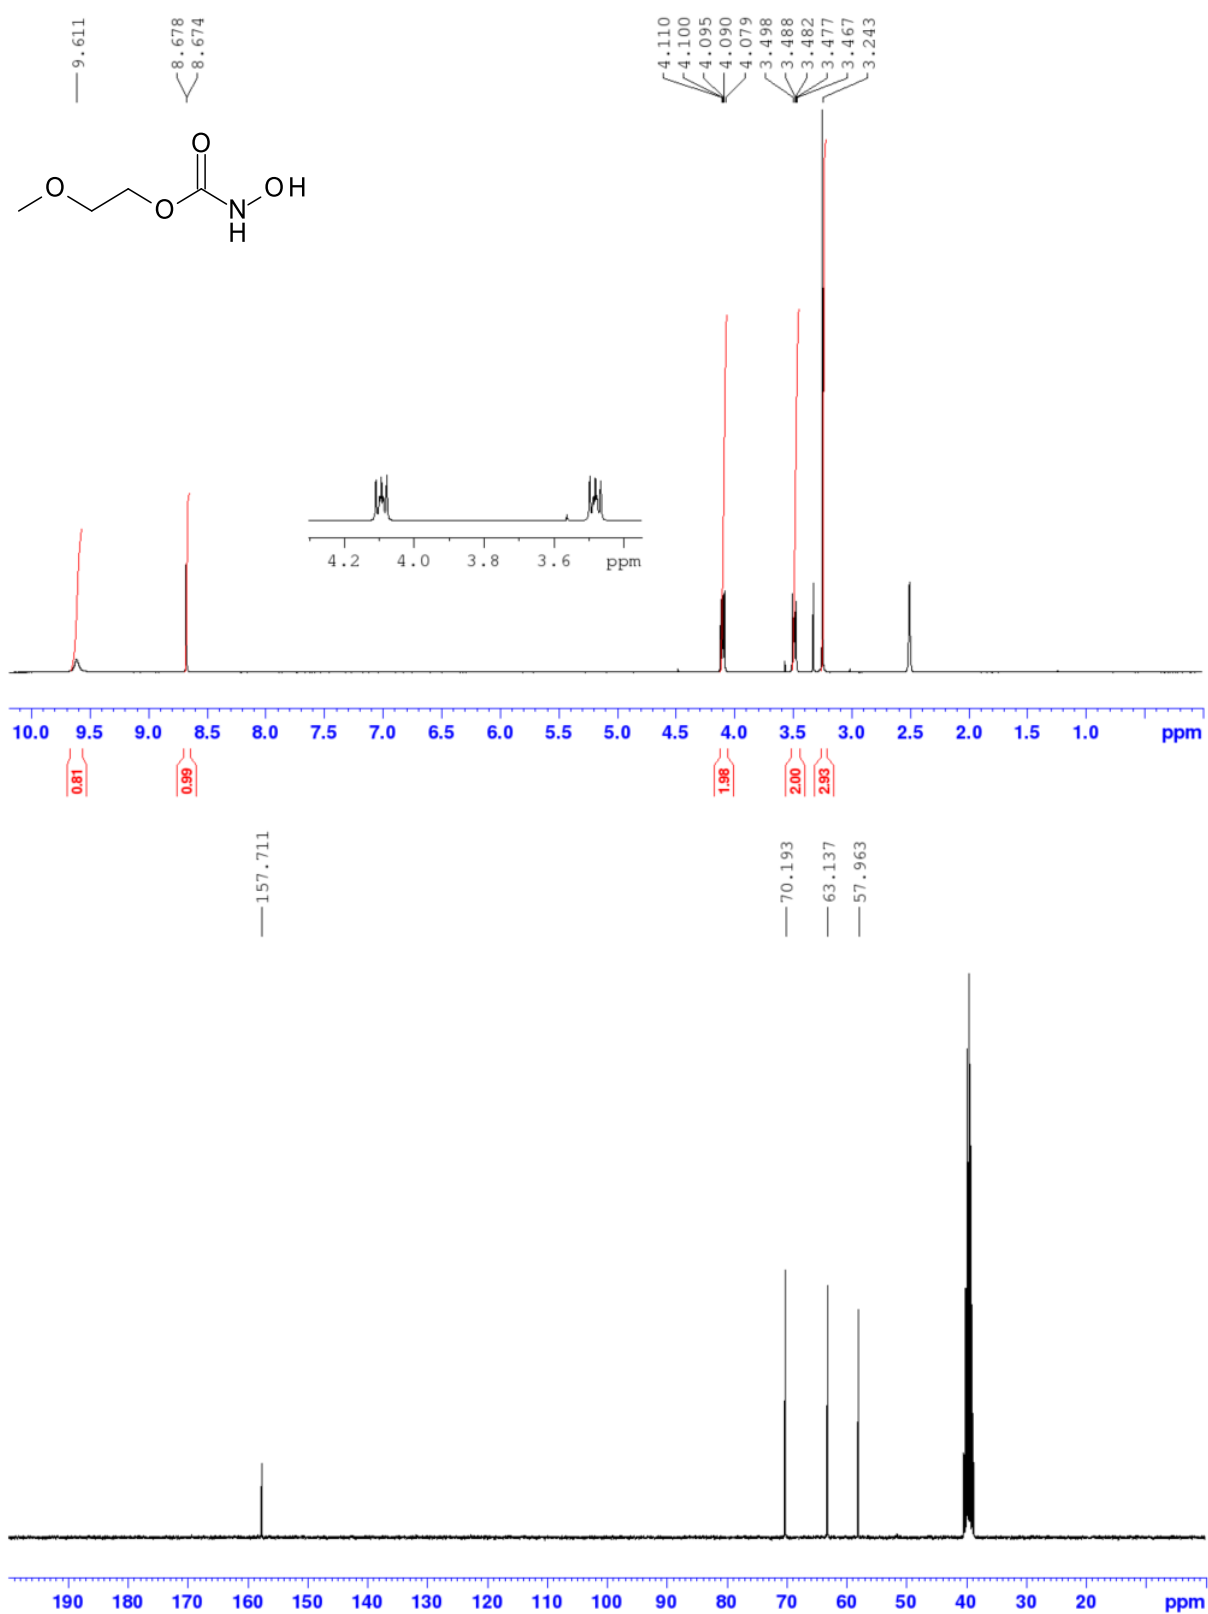

tetrahydropyran-4-yl N-hydroxycarbamate (**3k**)

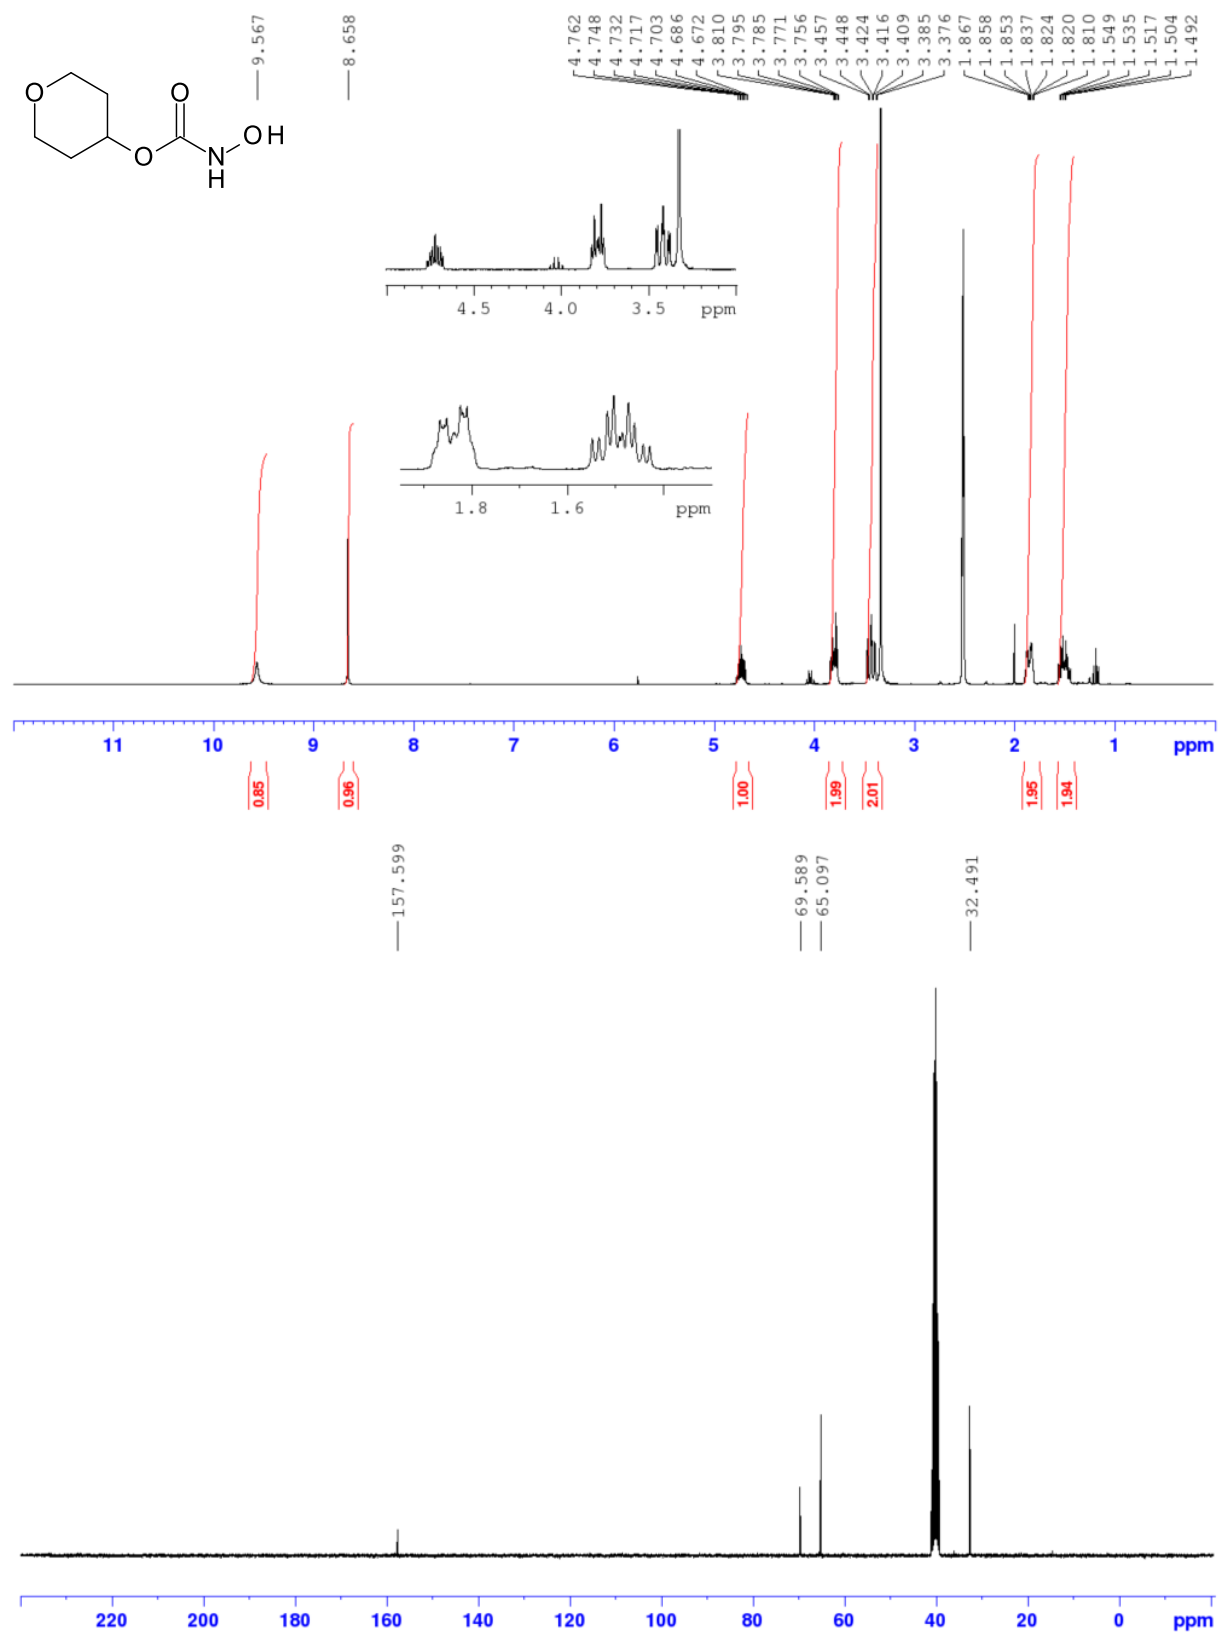

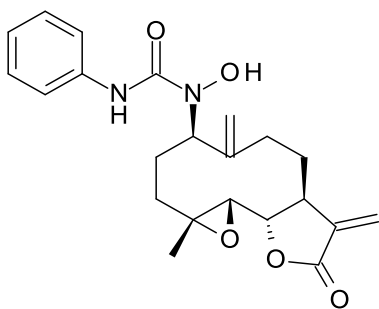

1-hydroxy-1-[(1S,2S,4R,7R,11S)-4-methyl-8,12-dimethylene-13-oxo-3,14-dioxatricyclo[9.3.0.02,4]tetradecan-7-yl]-3-phenyl-urea (**4**)

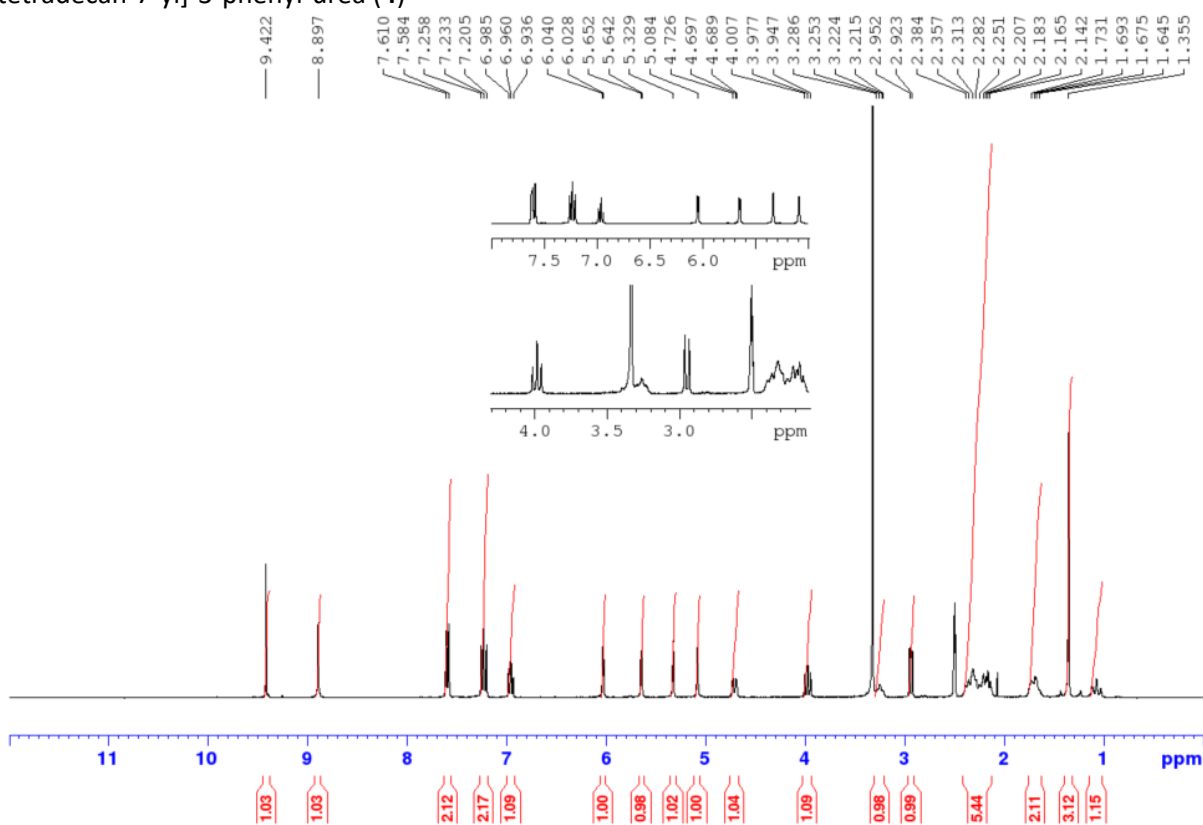

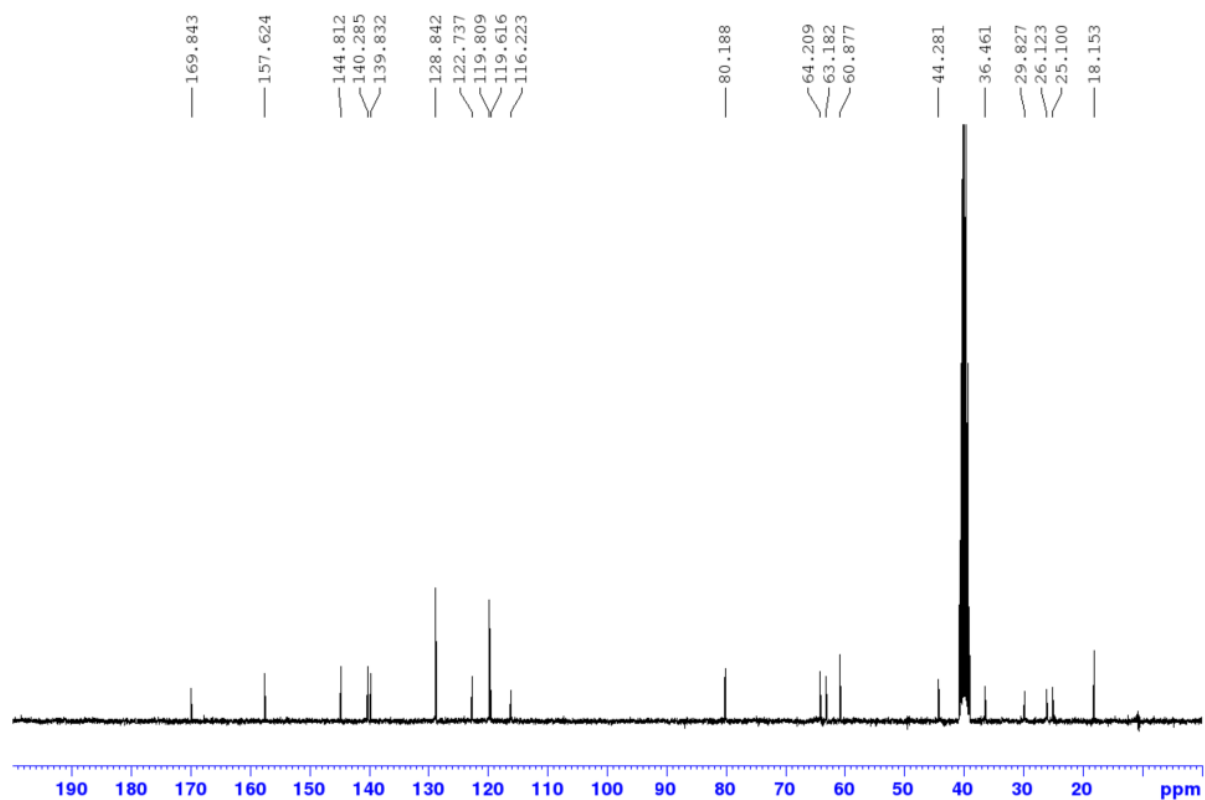

1-hydroxy-1-[(1S,2S,4R,7R,11S)-4-methyl-8,12-dimethylene-13-oxo-3,14-dioxatricyclo[9.3.0.0<sup>2,4</sup>]  
tetradecan-7-yl]-3-(p-tolyl)urea (**5**)

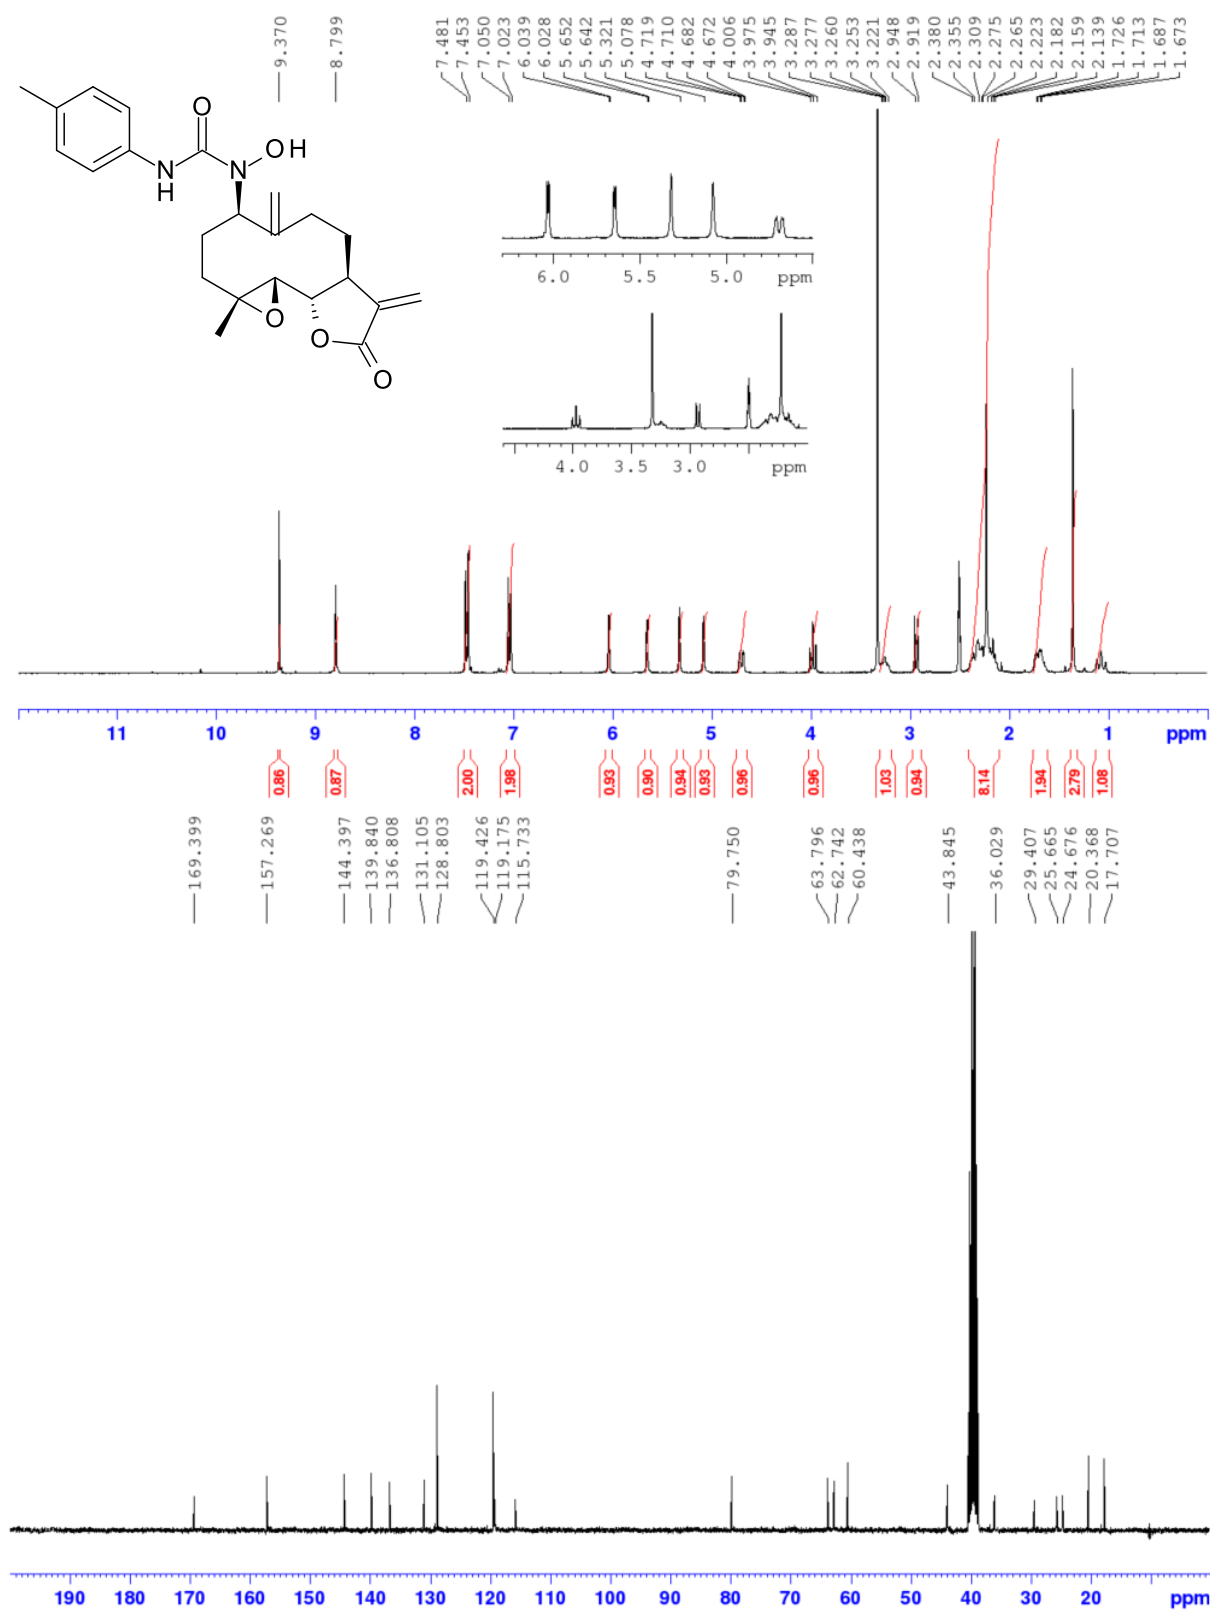

**Chemical structure of compound 1:** CC1(C)C(=O)O[C@H]1C[C@@H](C(=O)NCC2=CC=CC=C2)[C@H](C)C[C@H]1C(=O)O[C@H]1C

**<sup>1</sup>H NMR (400 MHz, CDCl<sub>3</sub>) peaks (ppm):** 9.017, 7.463, 7.443, 7.422, 7.320, 7.316, 7.311, 7.296, 7.292, 7.288, 7.276, 7.269, 7.244, 7.226, 7.222, 7.207, 7.198, 7.189, 7.182, 7.176, 6.039, 6.028, 5.654, 5.665, 5.273, 5.050, 4.605, 4.594, 4.567, 4.557, 4.238, 4.217, 3.991, 3.960, 3.930, 3.241, 2.919, 2.890, 2.340, 2.282, 2.275, 2.270, 2.264, 2.201, 2.175, 2.156, 2.132, 2.113, 1.694, 1.686, 1.675, 1.656, 1.646, 1.627, 1.614, 1.336, 1.064, 1.020.

**<sup>13</sup>C NMR (100 MHz, CDCl<sub>3</sub>) peaks (ppm):** 169.400, 160.405, 144.532, 140.627, 139.852, 128.074, 127.019, 126.489, 119.168, 115.483, 79.753, 64.497, 62.743, 60.449, 43.819, 42.841, 36.055, 29.477, 25.500, 24.677, 20.781, 17.699.

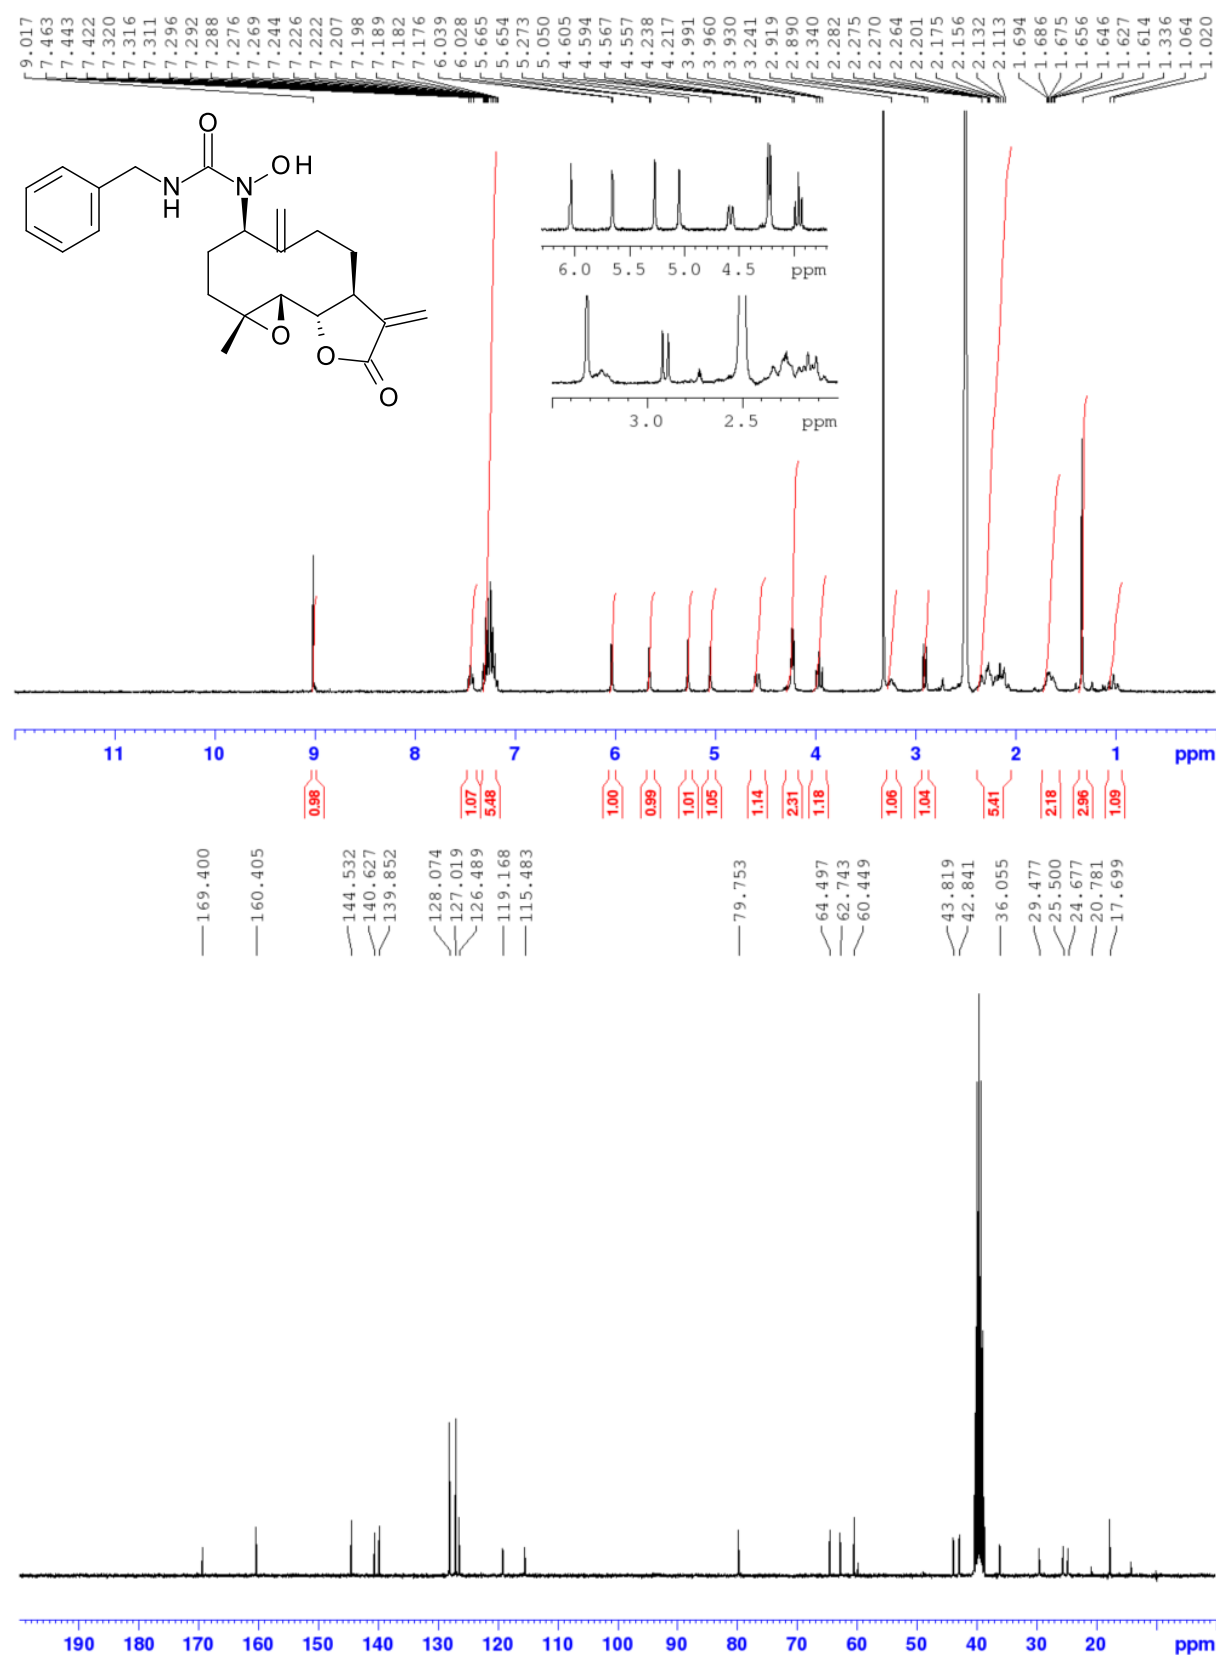



1-hydroxy-3-(4-methoxyphenyl)-1-[(1S,2S,4R,7R,11S)-4-methyl-8,12-dimethylene-13-oxo-3,14-dioxatricyclo[9.3.0.0<sup>2,4</sup>]tetradecan-7-yl]urea (**7**)

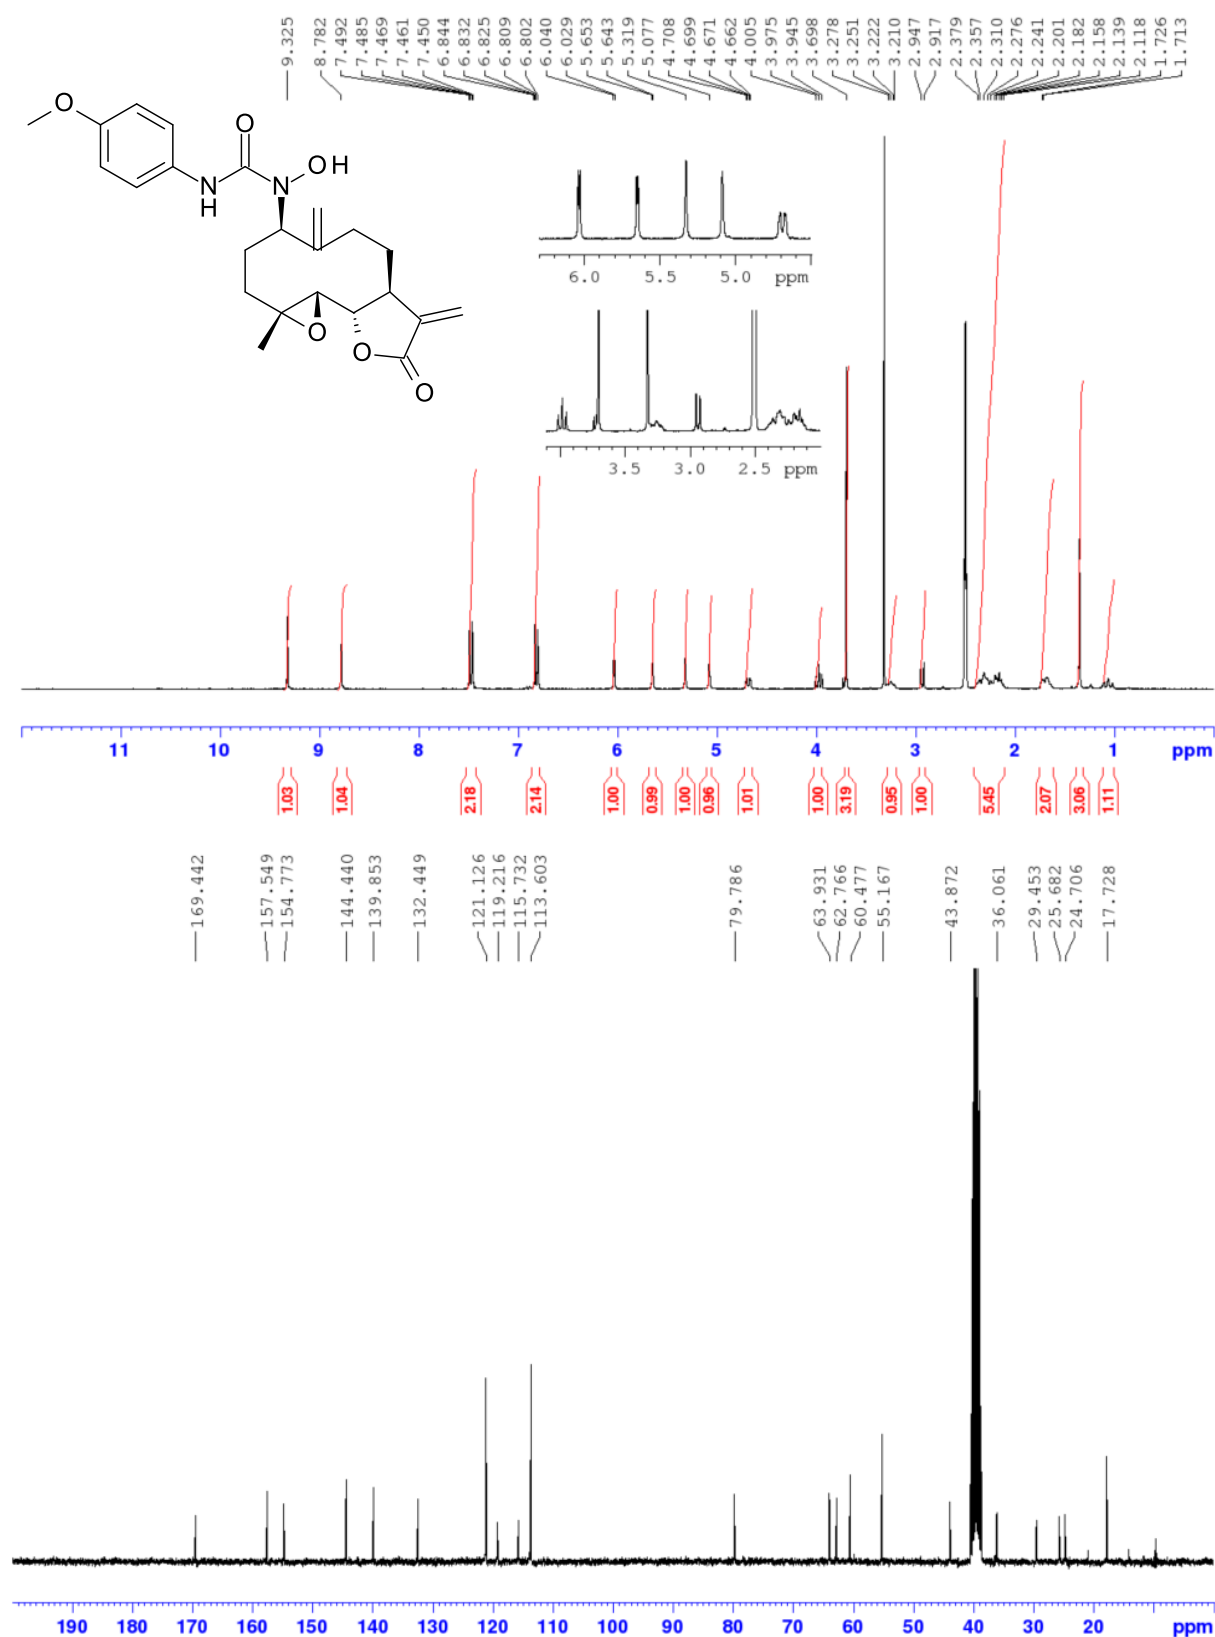

3-(4-fluorophenyl)-1-hydroxy-1-[(1S,2S,4R,7R,11S)-4-methyl-8,12-dimethylene-13-oxo-3,14-dioxatricyclo[9.3.0.0<sup>2,4</sup>]tetradecan-7-yl]urea (**8**)

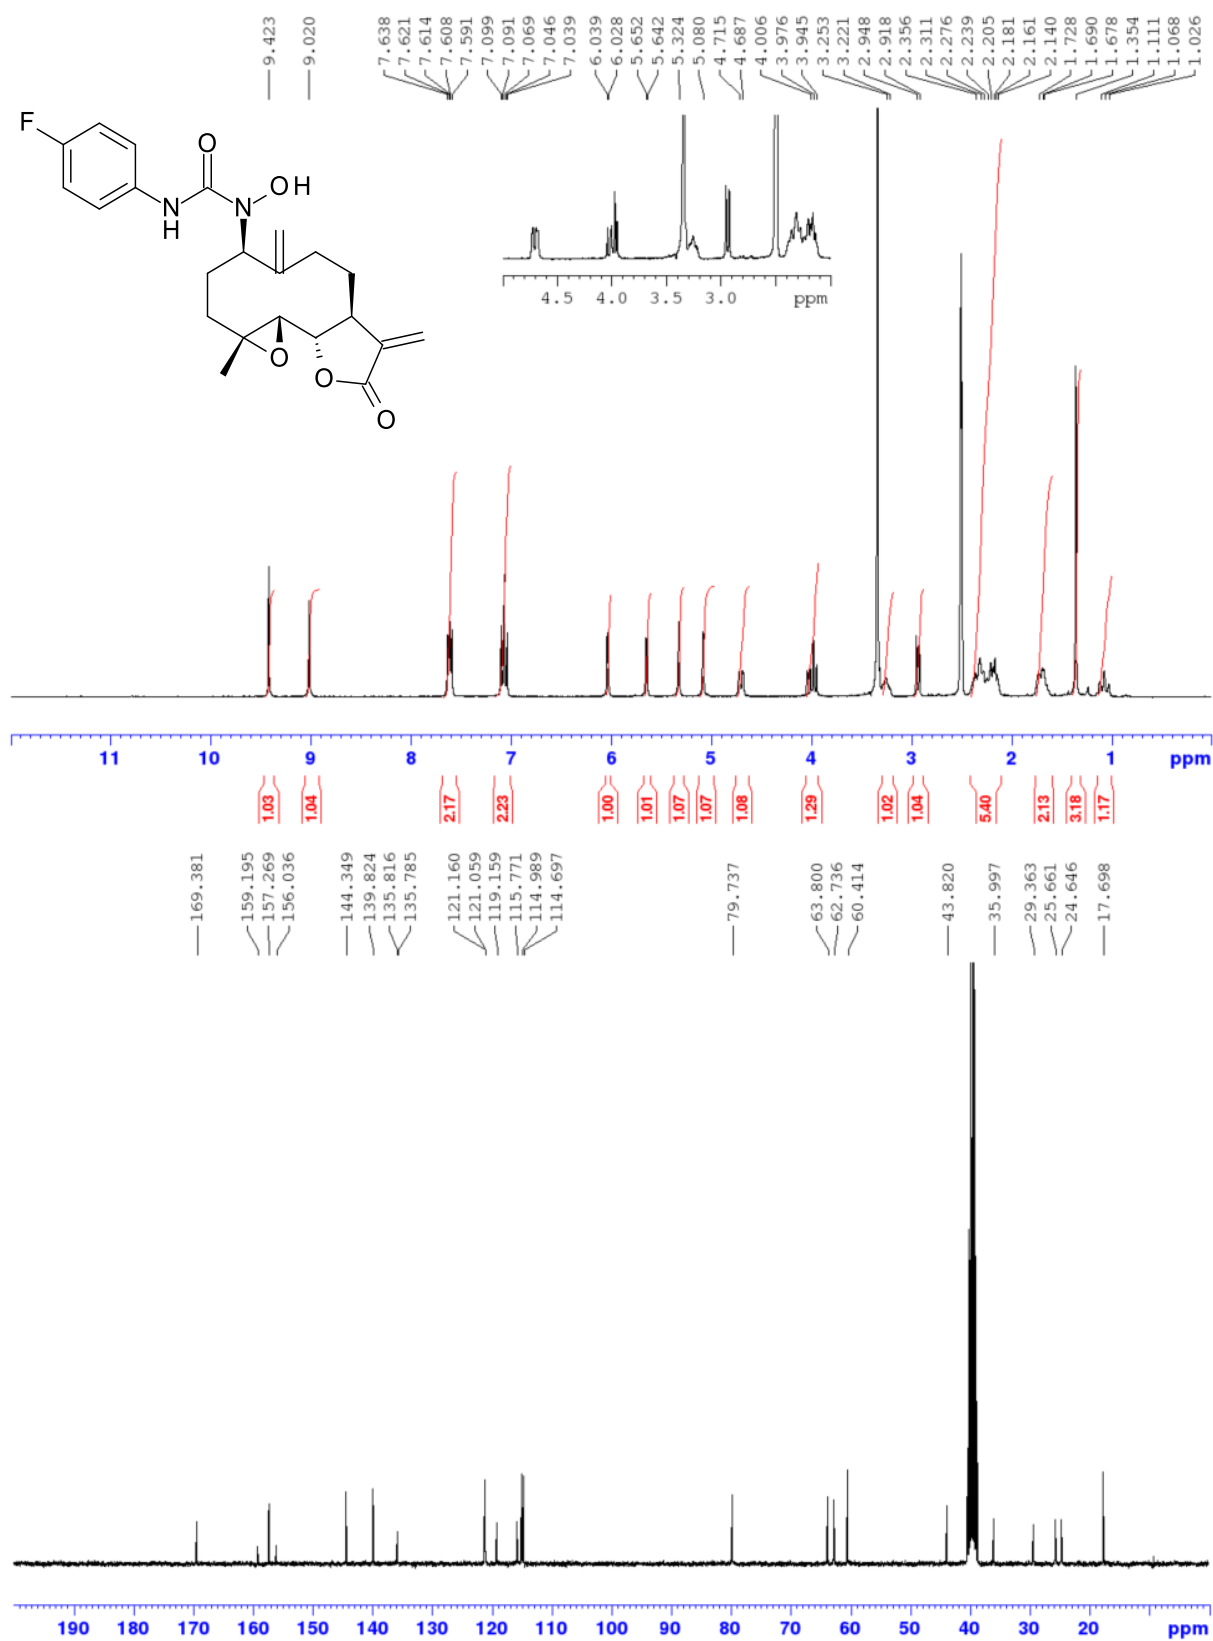

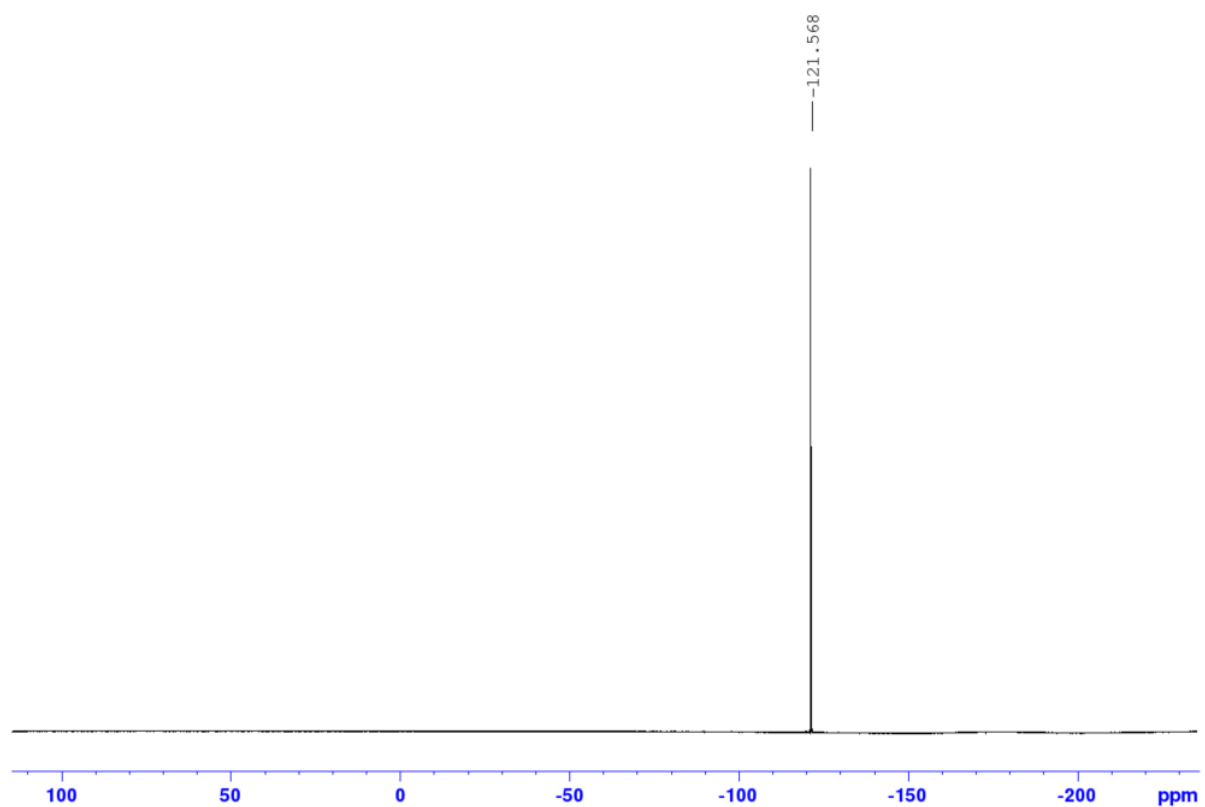

1-hydroxy-1-[(1S,2S,4R,7R,11S)-4-methyl-8,12-dimethylene-13-oxo-3,14-dioxatricyclo[9.3.0.0<sup>2,4</sup>]tetradecan-7-yl]urea (**9**)

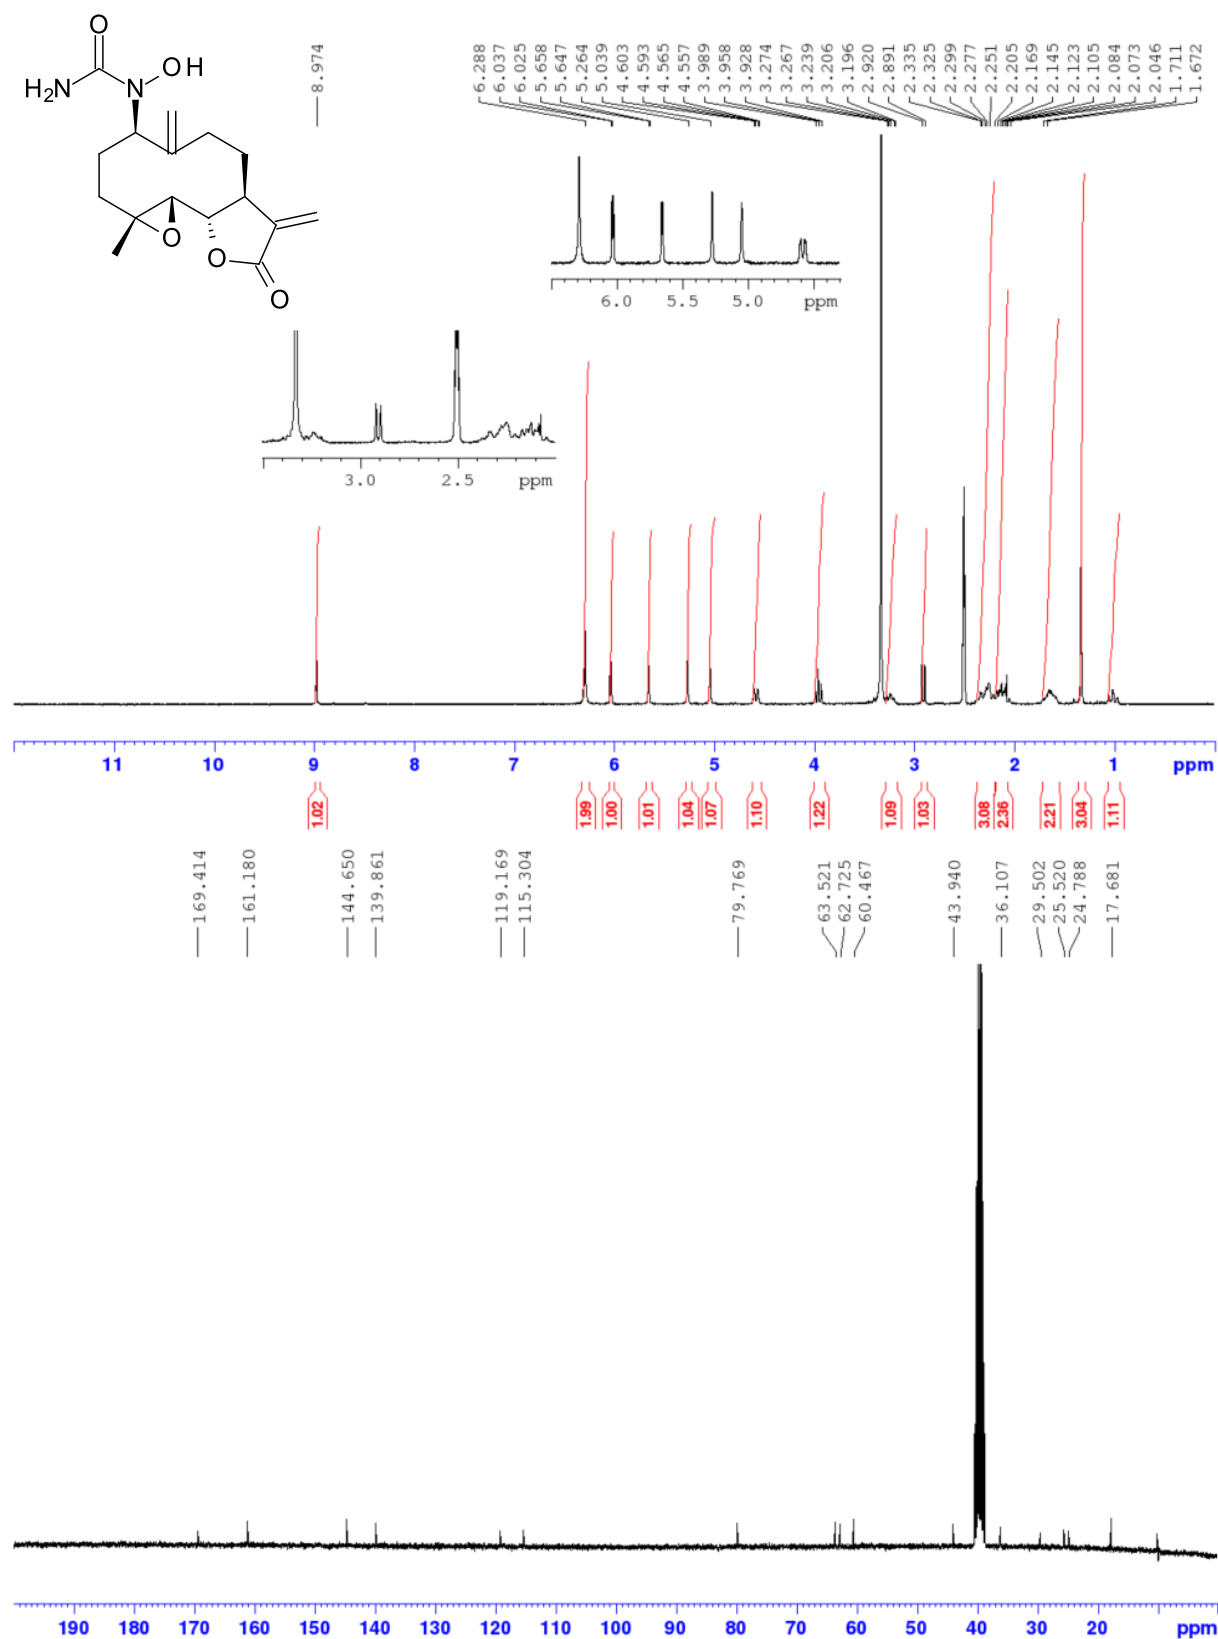

3-(1,3-benzodioxol-5-yl)-1-hydroxy-1-[(1S,2S,4R,7R,11S)-4-methyl-8,12-dimethylene-13-oxo-3,14-dioxatricyclo[9.3.0.0<sup>2,4</sup>] tetradecan-7-yl]urea (**10**)

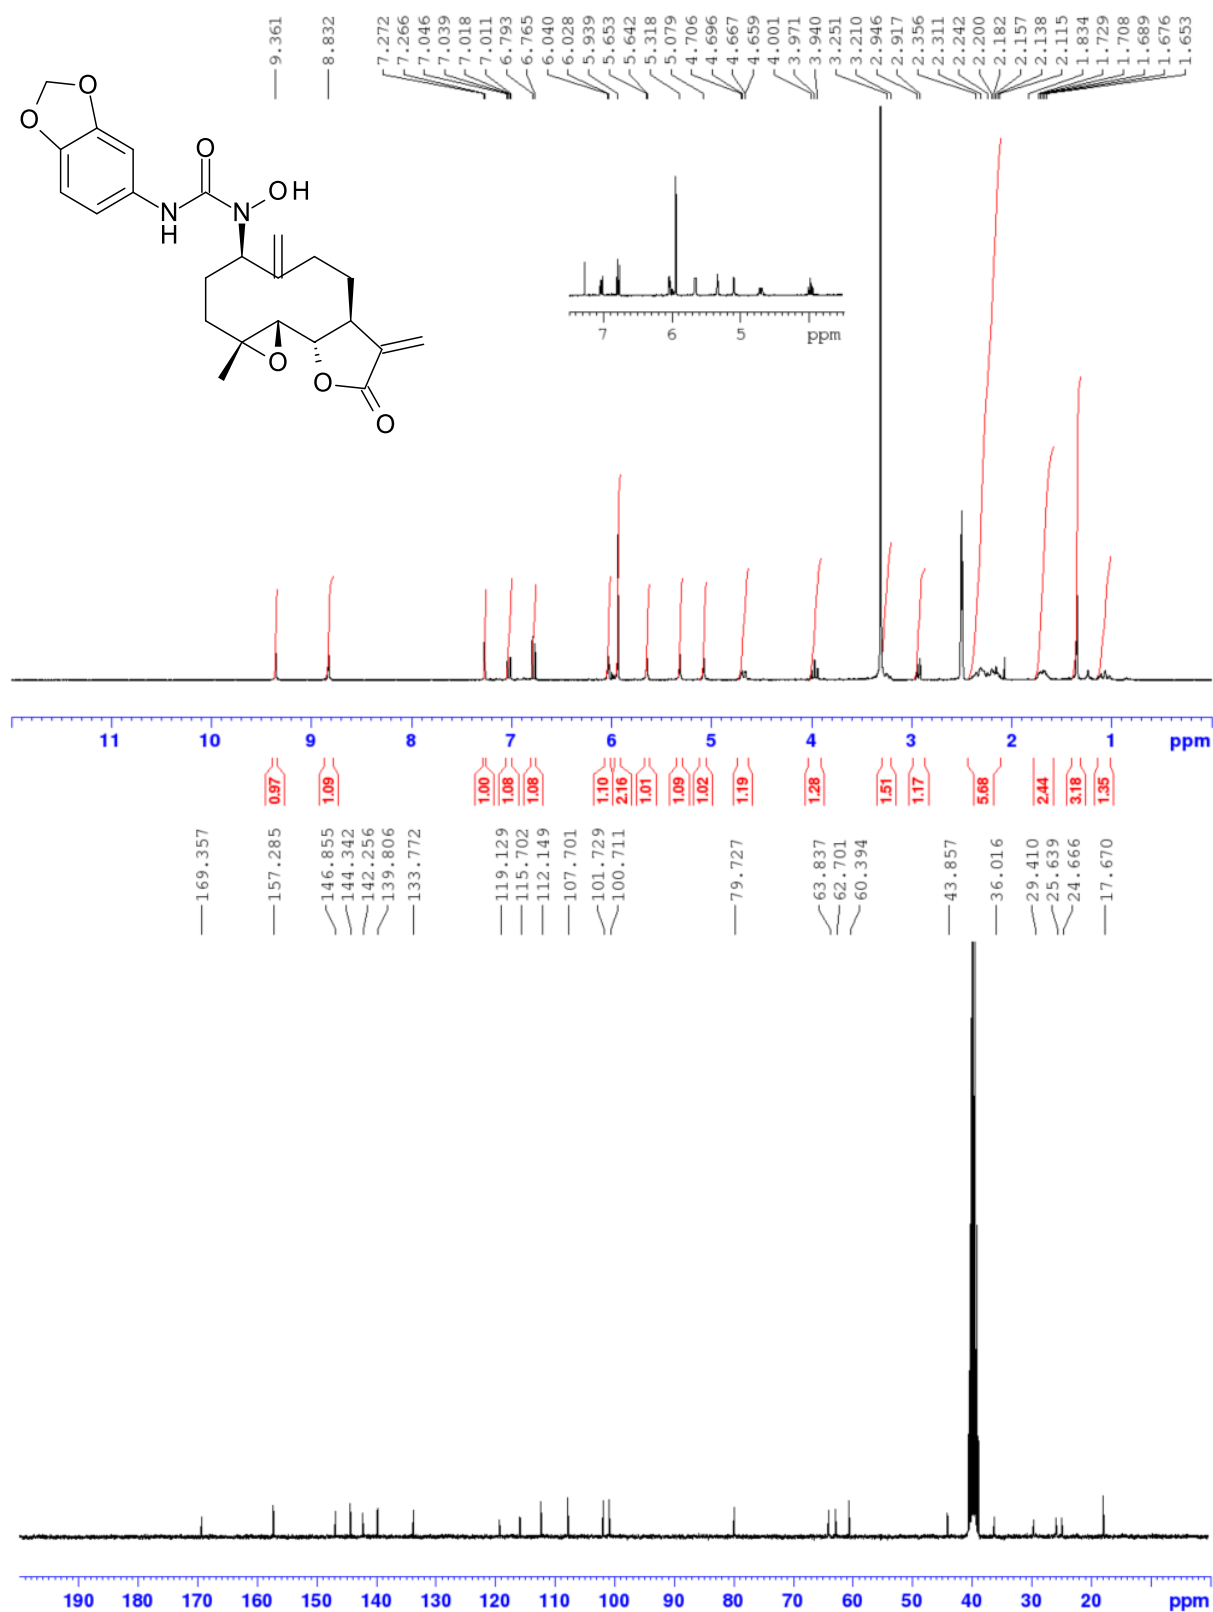

3-(3-ethoxypropyl)-1-hydroxy-1-[(1S,2S,4R,7R,11S)-4-methyl-8,12-dimethylene-13-oxo-3,14-dioxatricyclo[9.3.0.02,4]tetradecan-7-yl]urea (**11**)

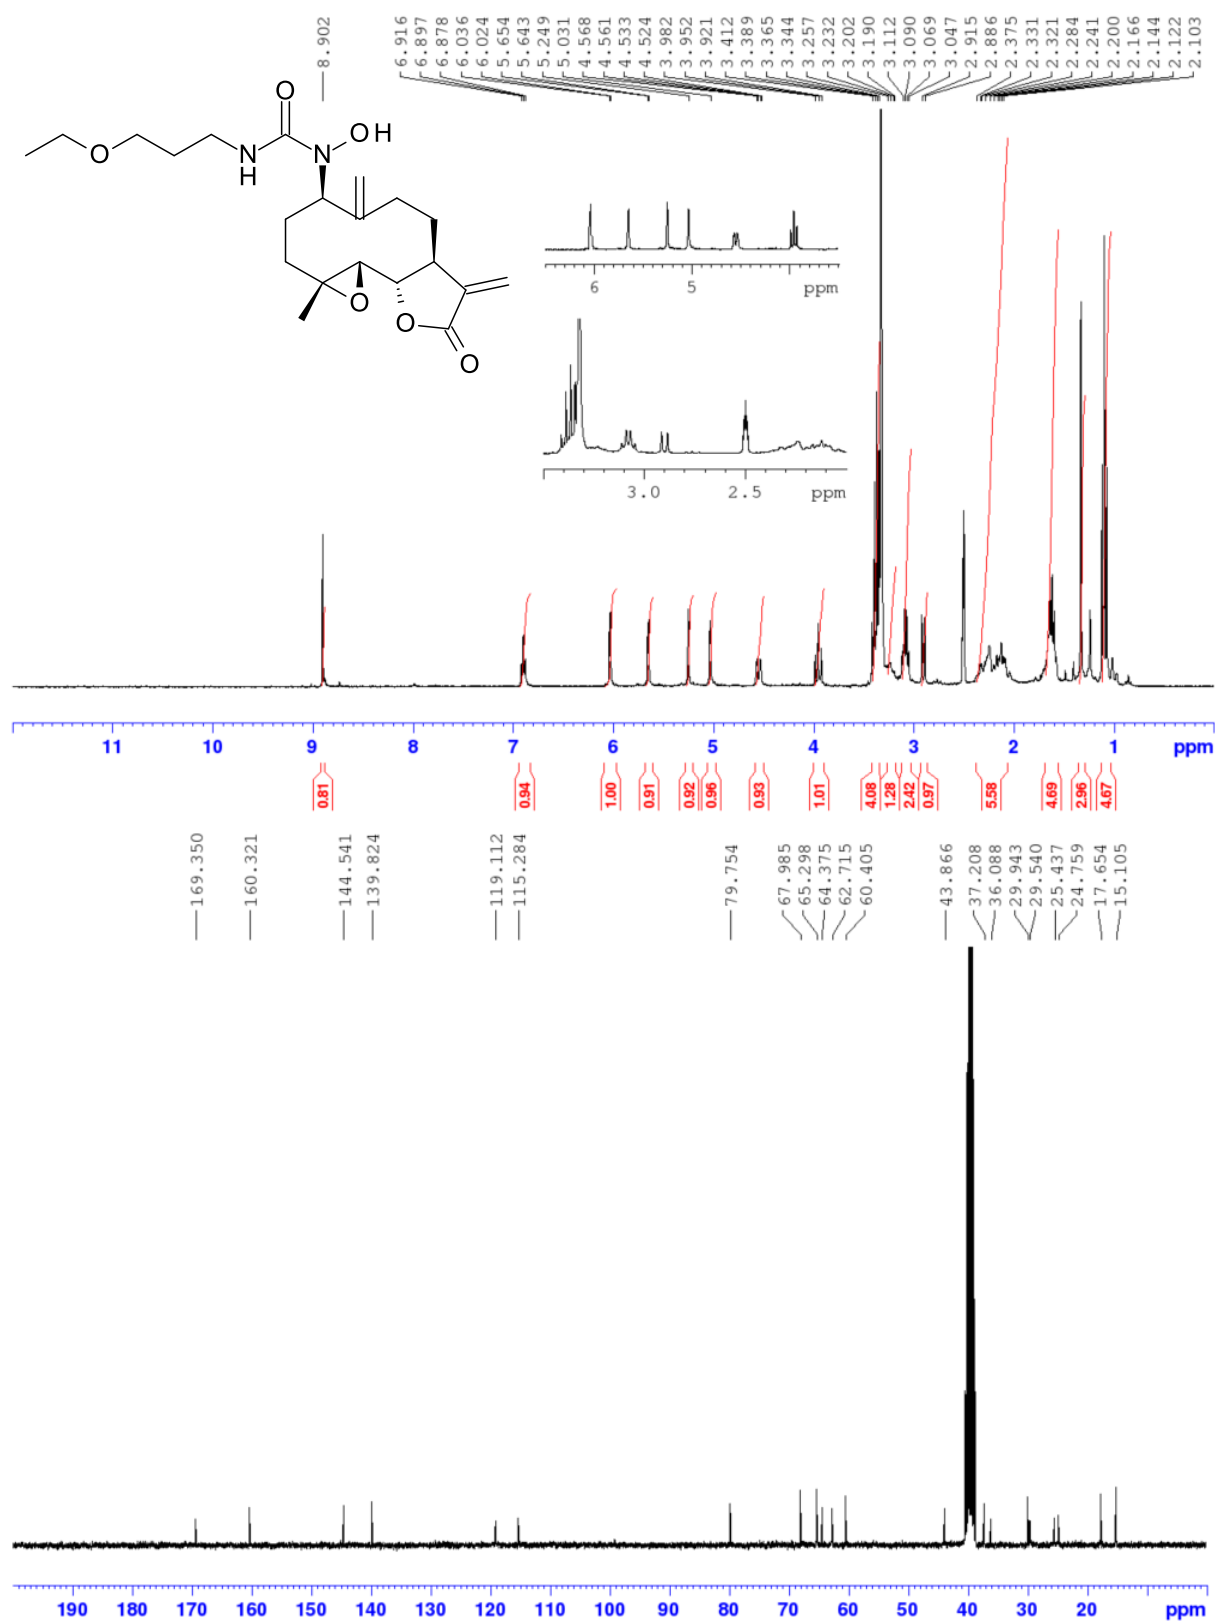

tert-butyl N-hydroxy-N-[(1S,2S,4R,7R,11S)-4-methyl-8,12-dimethylene-13-oxo-3,14-dioxatricyclo[9.3.0.0<sup>2,4</sup>]tetradecan-7-yl]carbamate (**12**)

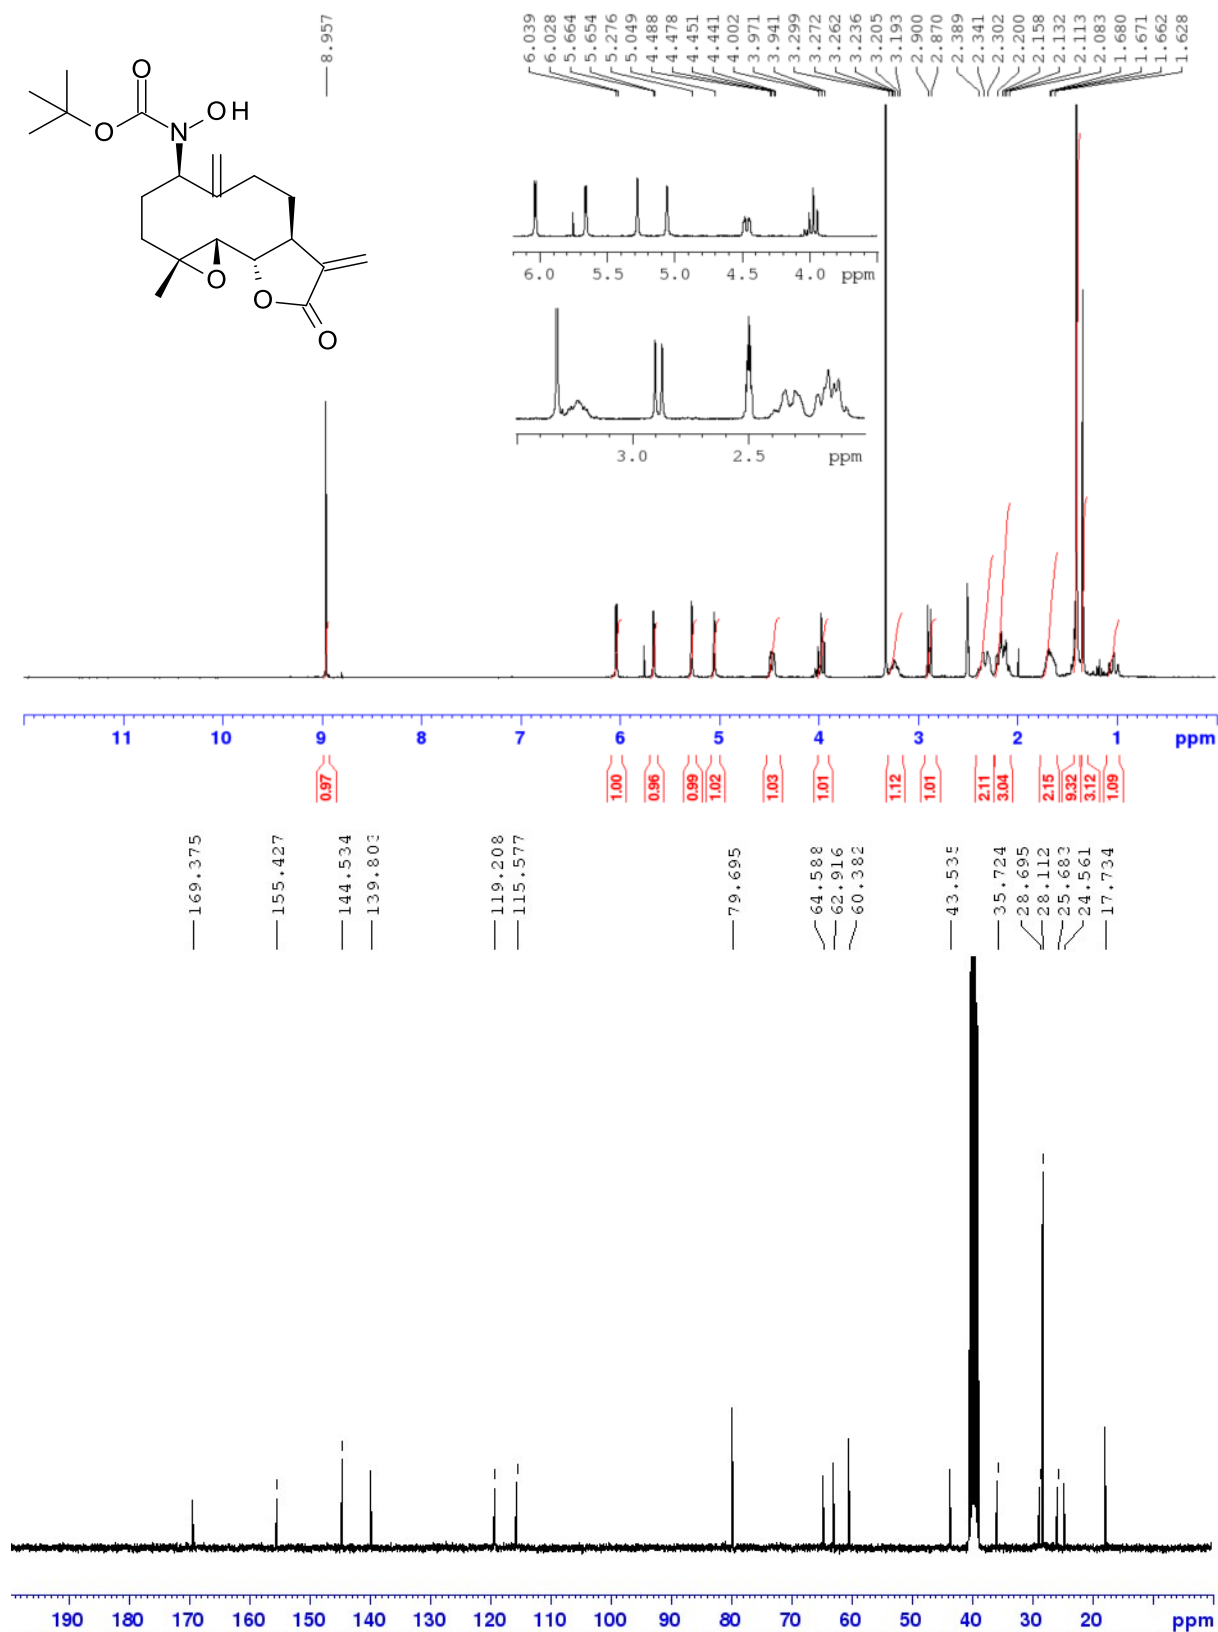

allyl N-hydroxy-N-[(1S,2S,4R,7R,11S)-4-methyl-8,12-dimethylene-13-oxo-3,14-dioxatricyclo  
[9.3.0.02,4]tetradecan-7-yl]carbamate (**13**)

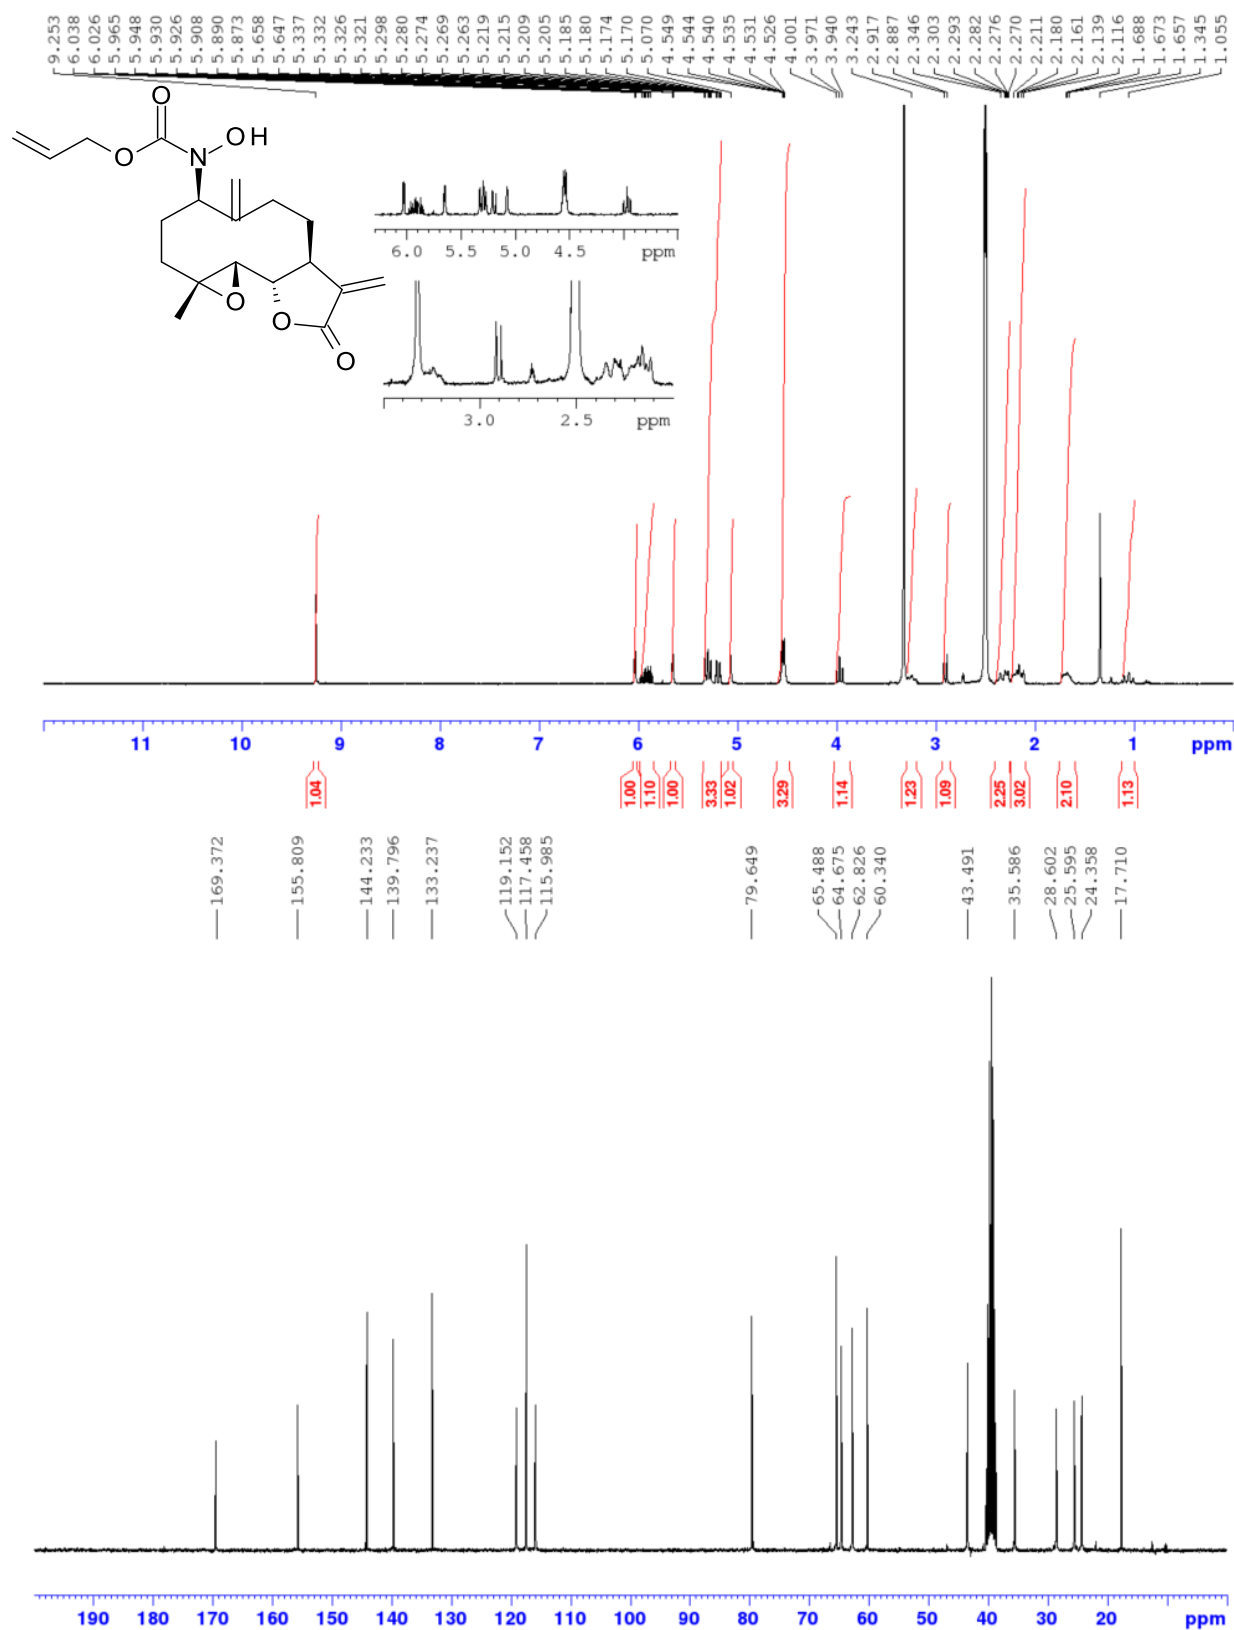



benzyl N-hydroxy-N-[(1S,2S,4R,7R,11S)-4-methyl-8,12-dimethylene-13-oxo-3,14-dioxatricyclo  
[9.3.0.0<sup>2,4</sup>]tetradecan-7-yl]carbamate (**14**)

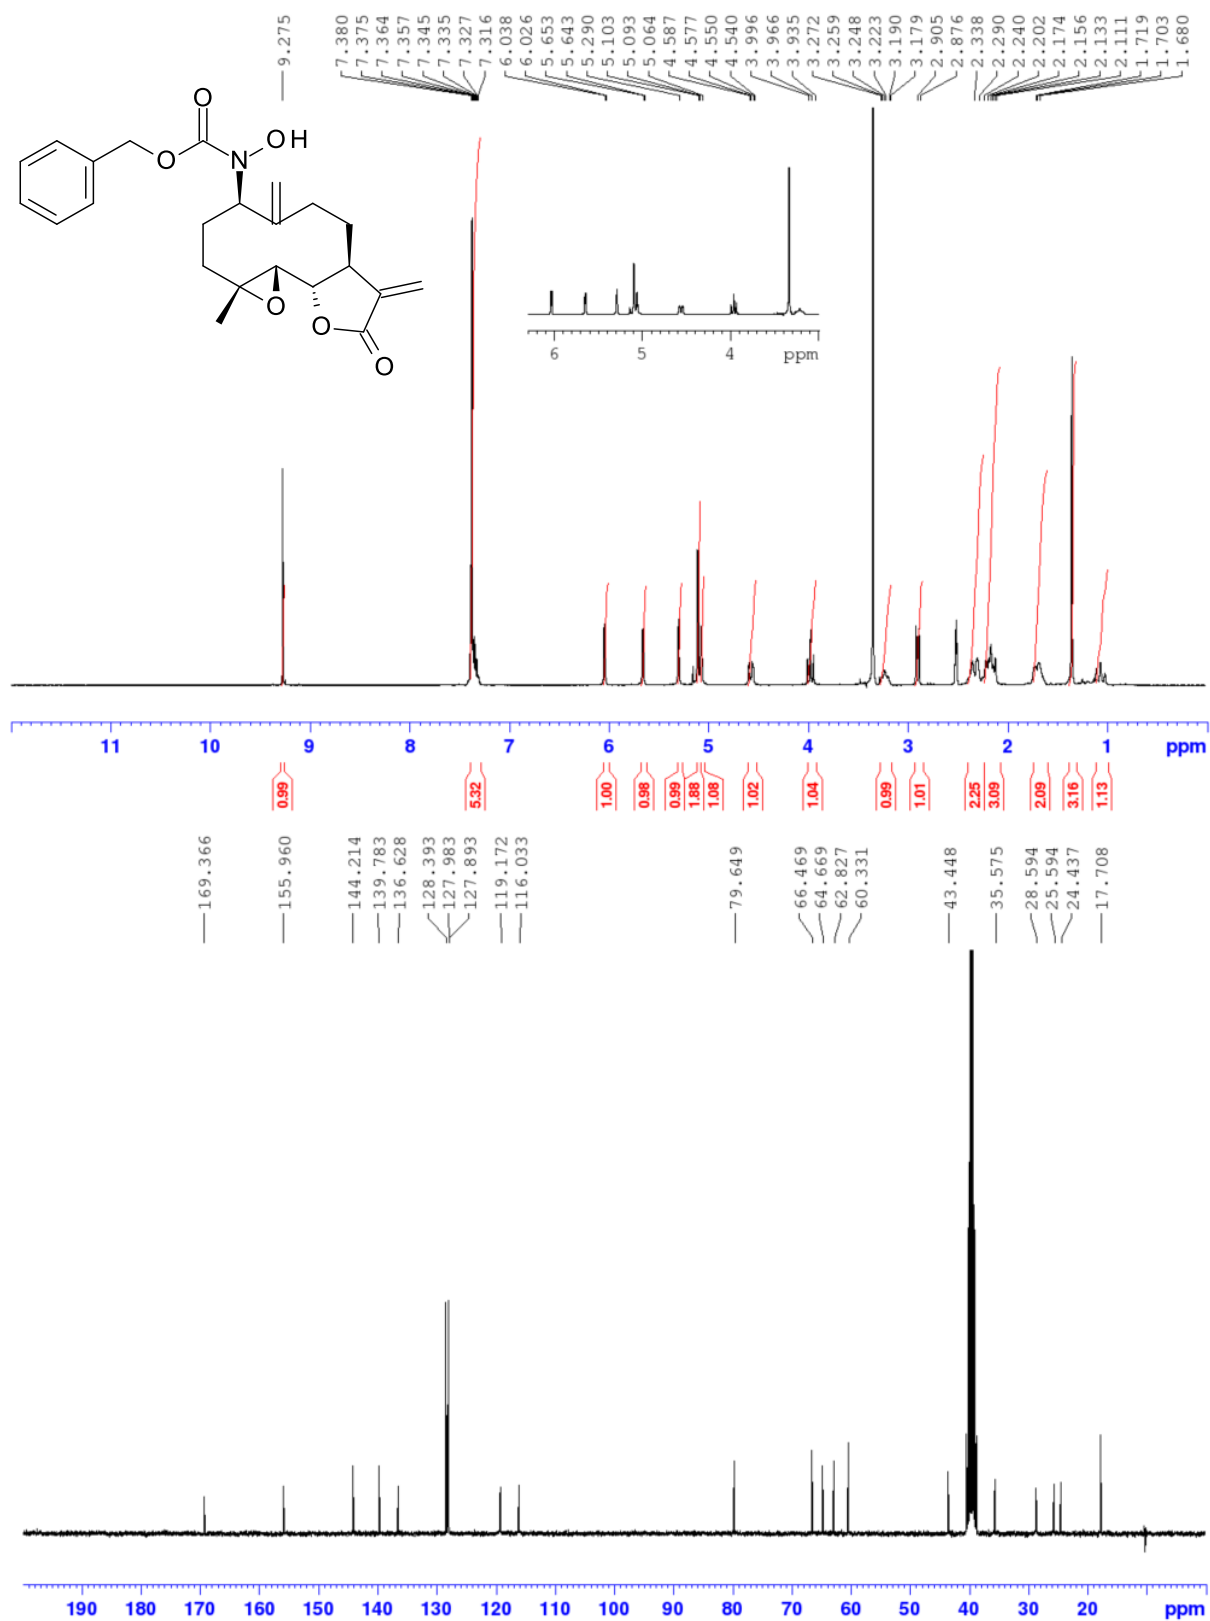

2,2,2-trichloroethyl N-hydroxy-N-[(1S,2S,4R,7R,11S)-4-methyl-8,12-dimethylene-13-oxo-3,14-dioxatricyclo[9.3.0.0<sup>2,4</sup>]tetradecan-7-yl]carbamate (**15**)

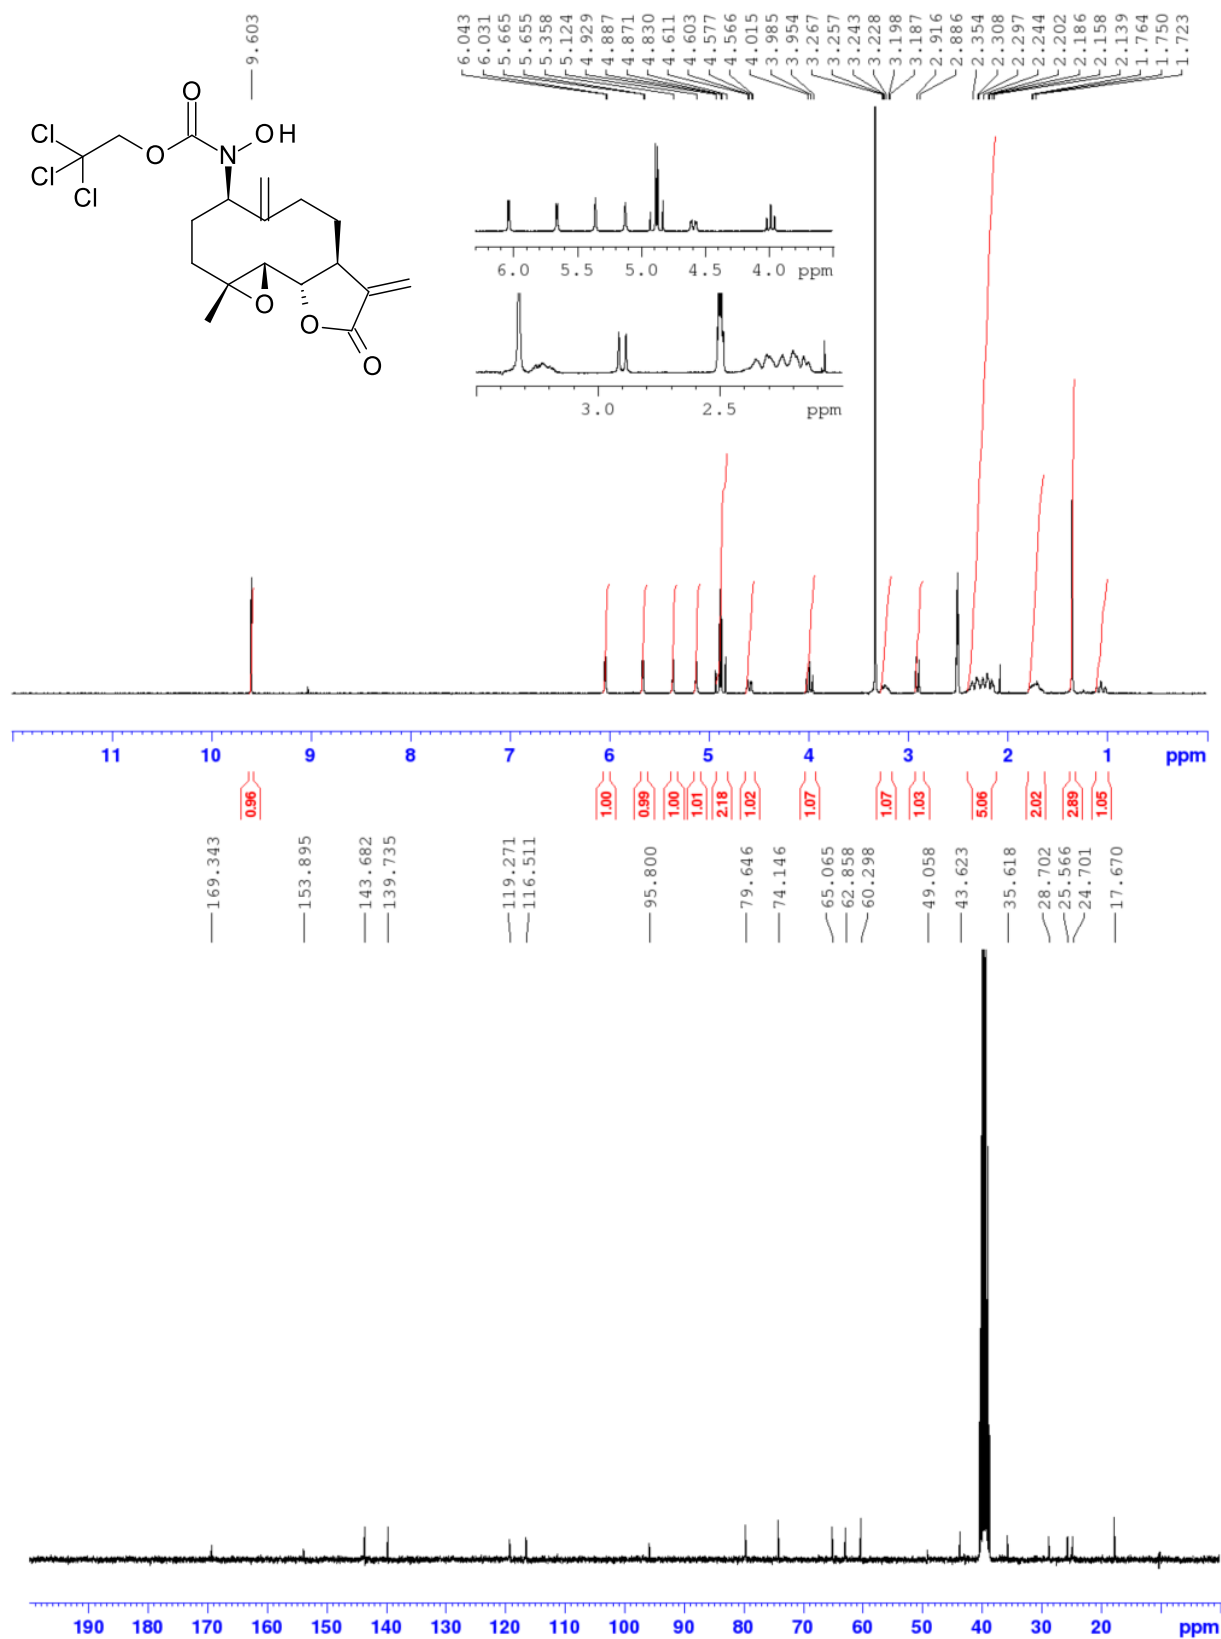

(4-fluorophenyl) N-hydroxy-N-[(1S,2S,4R,7R,11S)-4-methyl-8,12-dimethylene-13-oxo-3,14-dioxatricyclo[9.3.0.02,4]tetradecan-7-yl]carbamate (**16**)

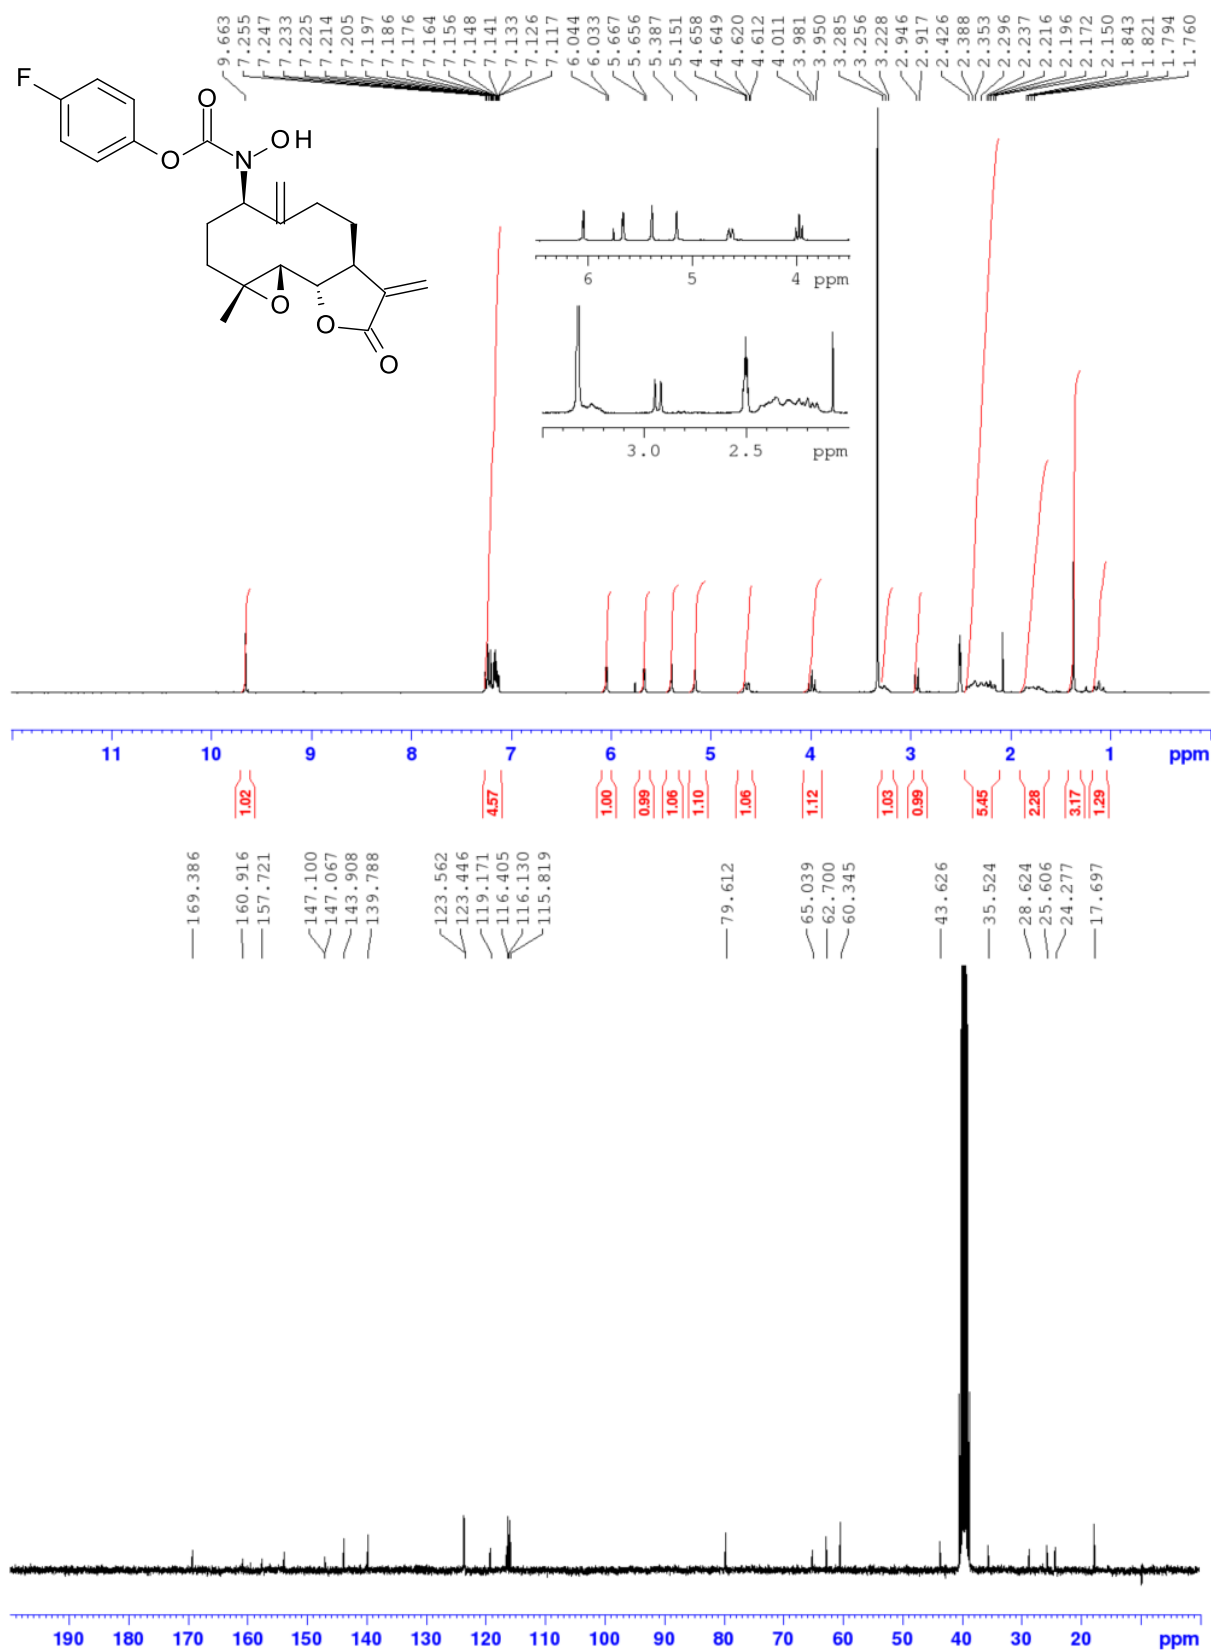

phenyl N-hydroxy-N-[(1S,2S,4R,7R,11S)-4-methyl-8,12-dimethylene-13-oxo-3,14-dioxatricyclo[9.3.0.02,4]tetradecan-7-yl]carbamate (**17**)

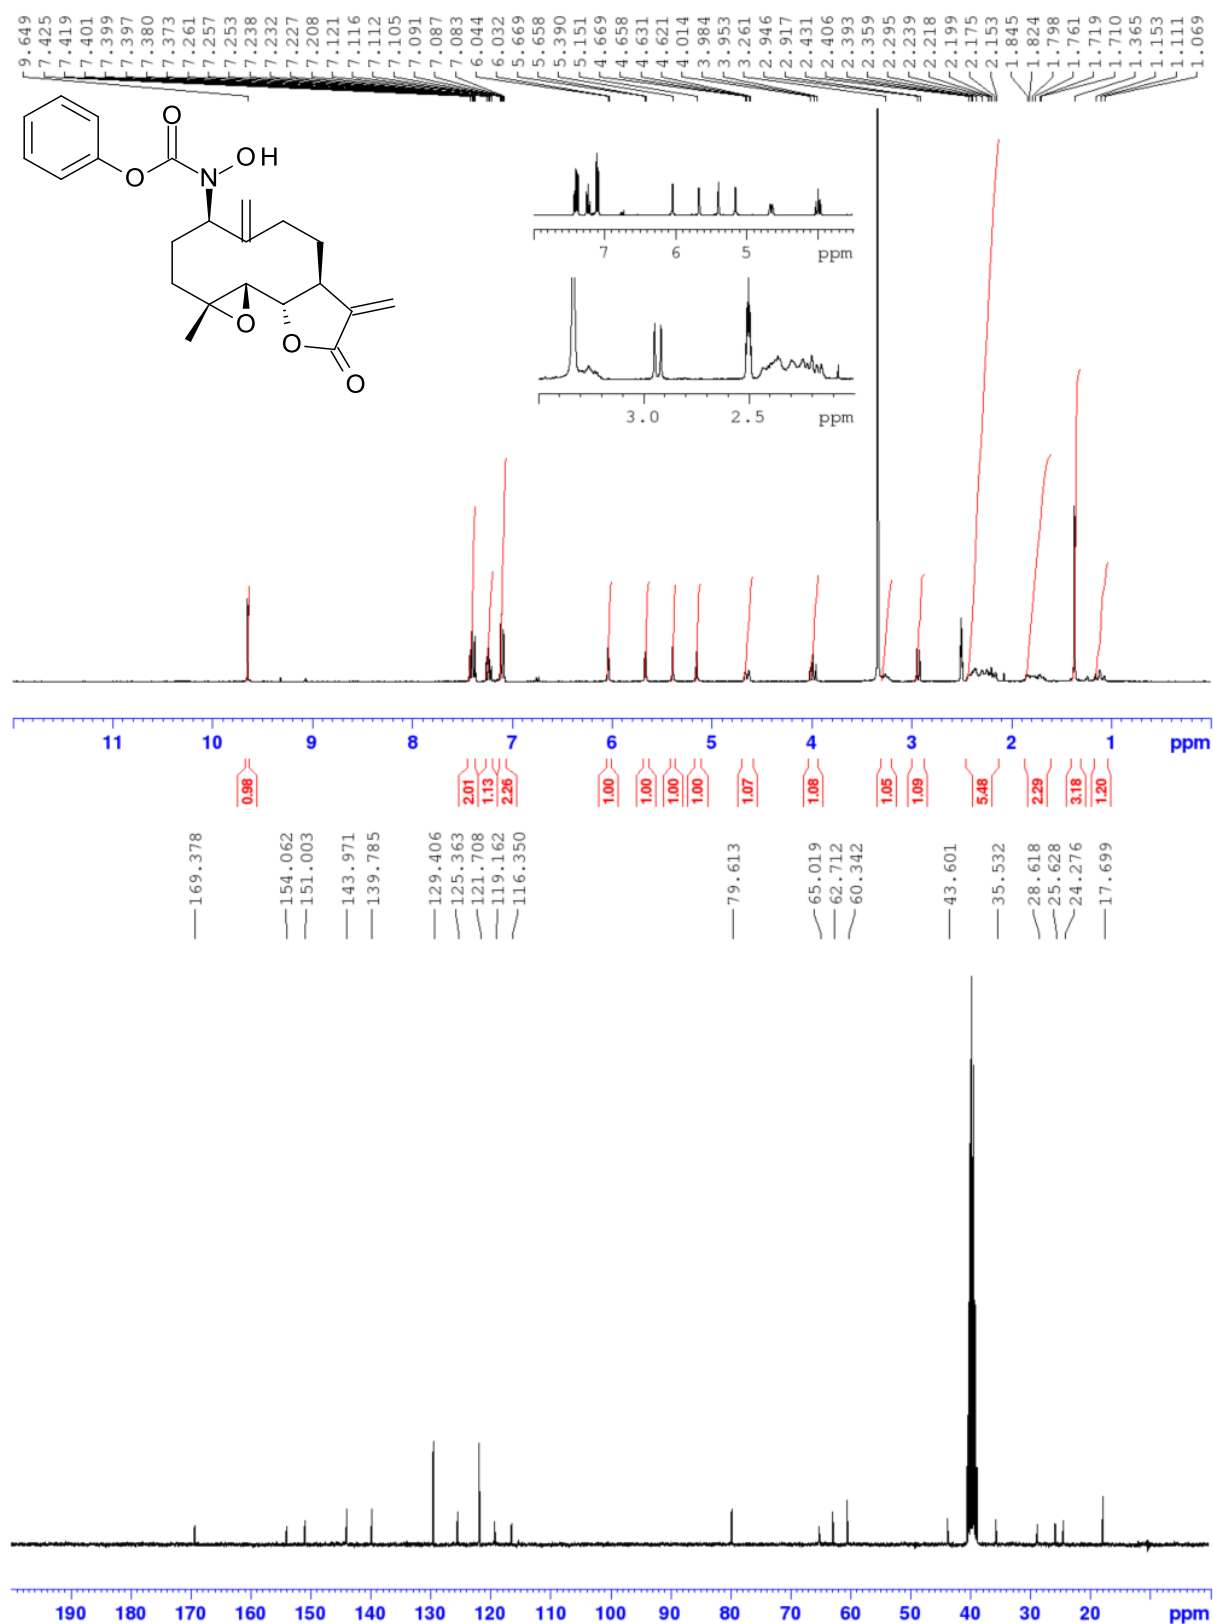

isobutyl

N-hydroxy-N-[(1S,2S,4R,7R,11S)-4-methyl-8,12-dimethylene-13-oxo-3,14-dioxatricyclo[9.3.0.0<sup>2,4</sup>]tetradecan-7-yl]carbamate (**18**)

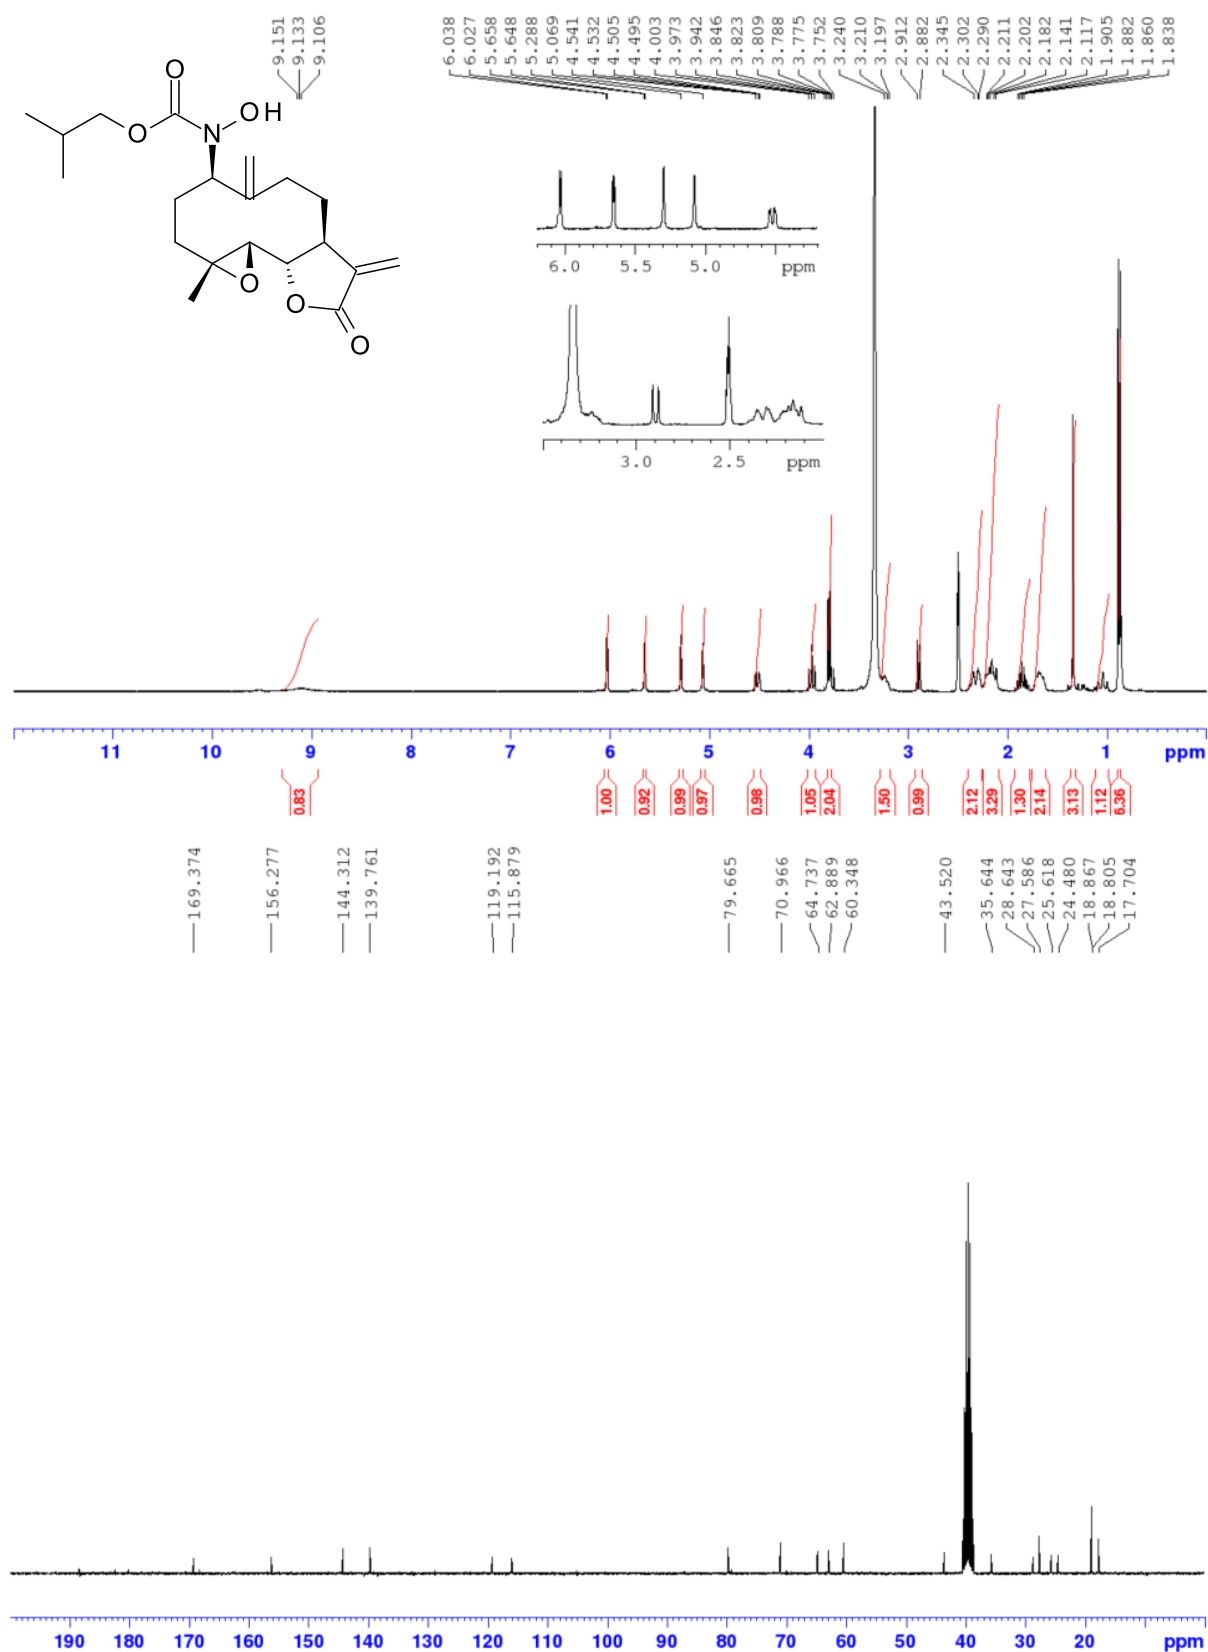

ethyl N-hydroxy-N-[(1S,2S,4R,7R,11S)-4-methyl-8,12-dimethylene-13-oxo-3,14-dioxatricyclo[9.3.0.02,4]tetradecan-7-yl]carbamate (**19**)

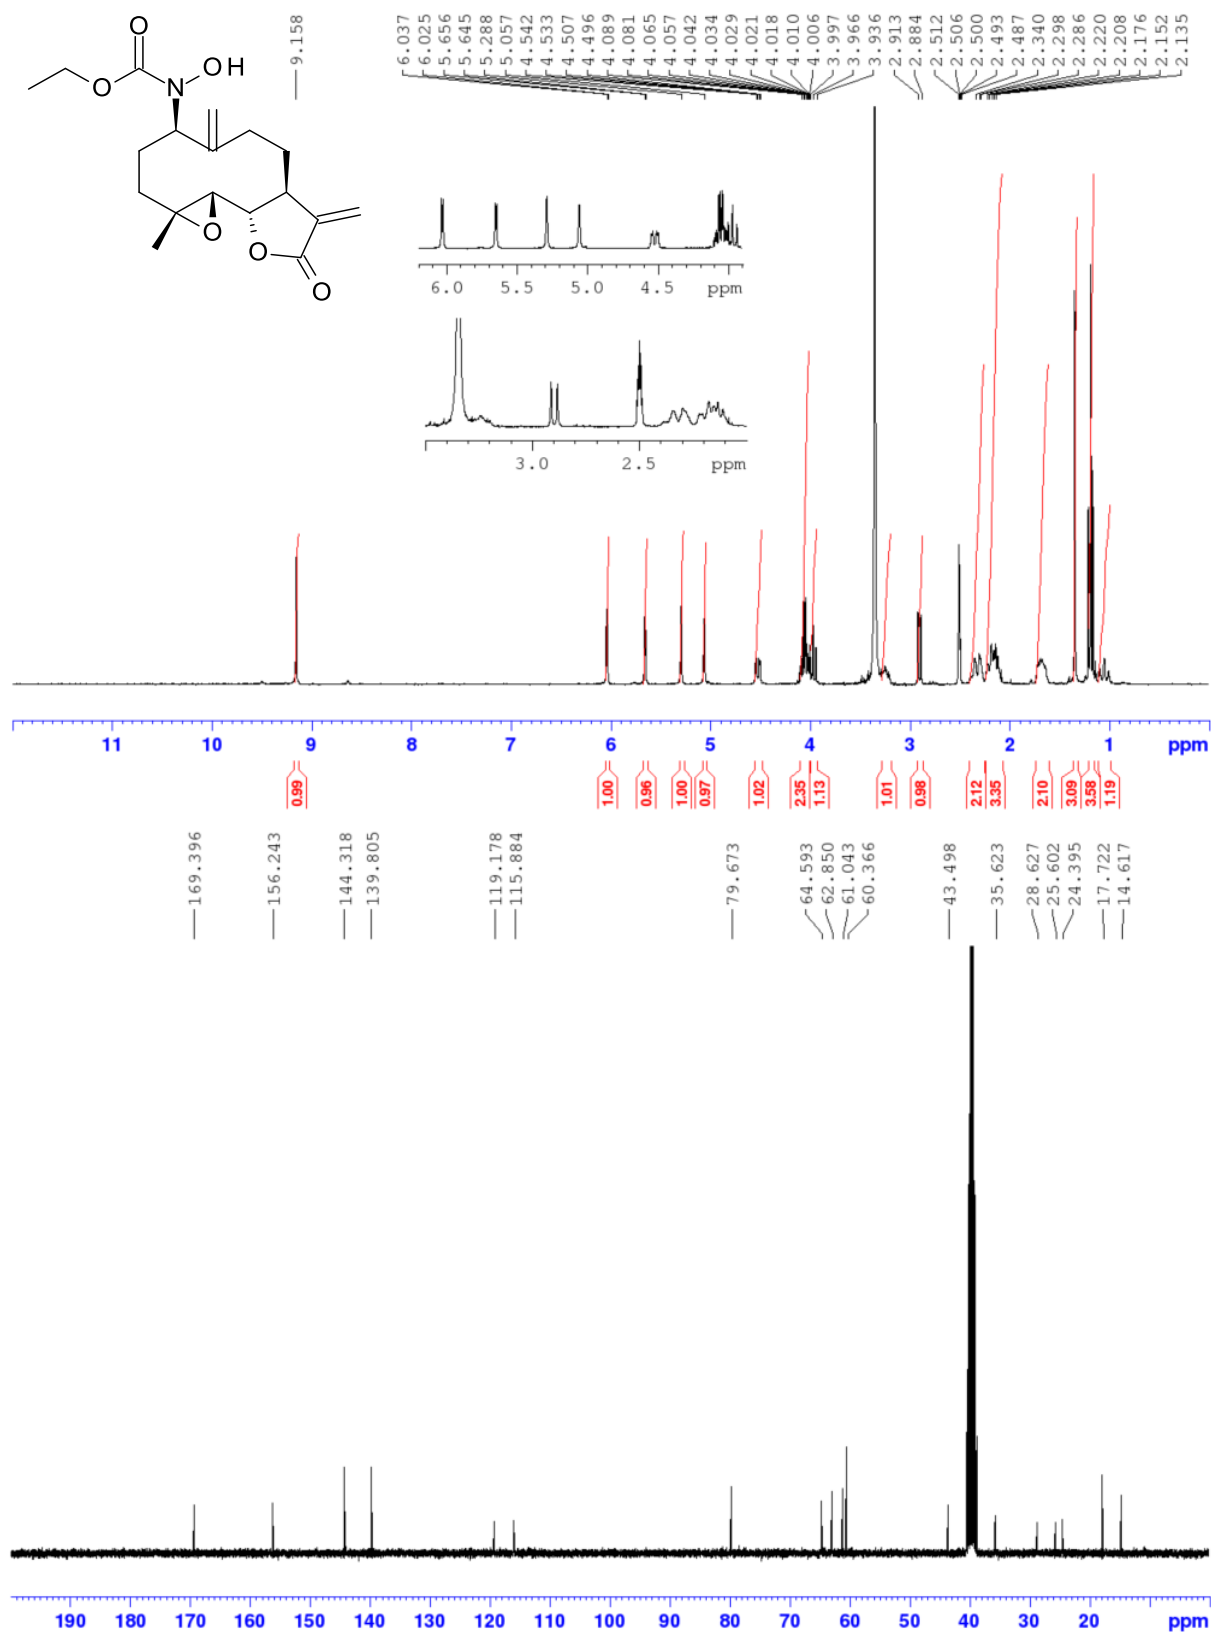

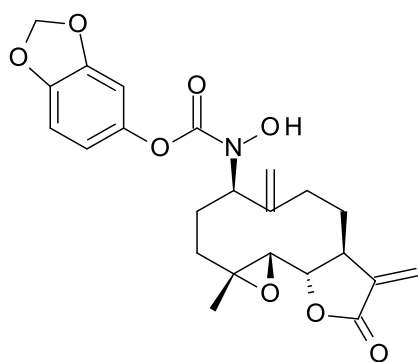

1,3-benzodioxol-5-yl N-hydroxy-N-[(1S,2S,4R,7R,11S)-4-methyl-8,12-dimethylene-13-oxo-3,14-dioxatricyclo[9.3.0.0<sup>2,4</sup>]tetradecan-7-yl]carbamate (**20**)

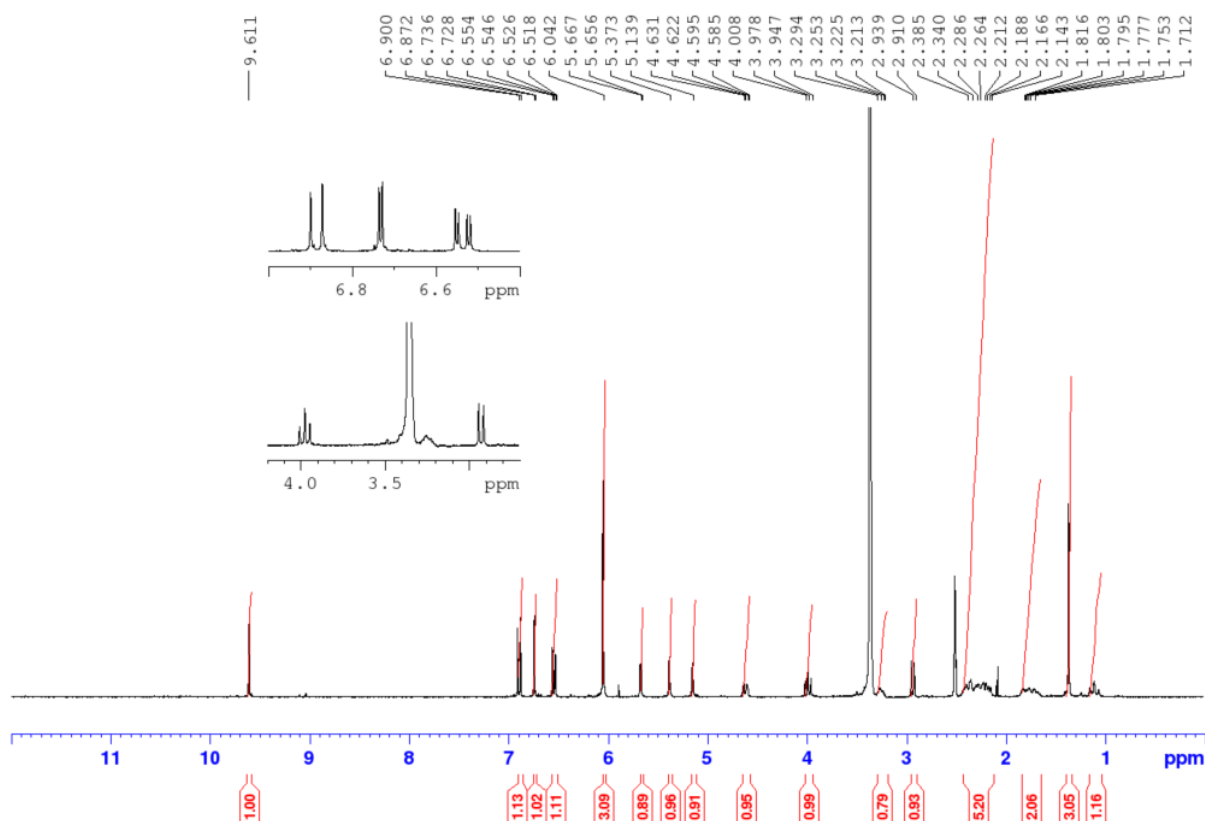

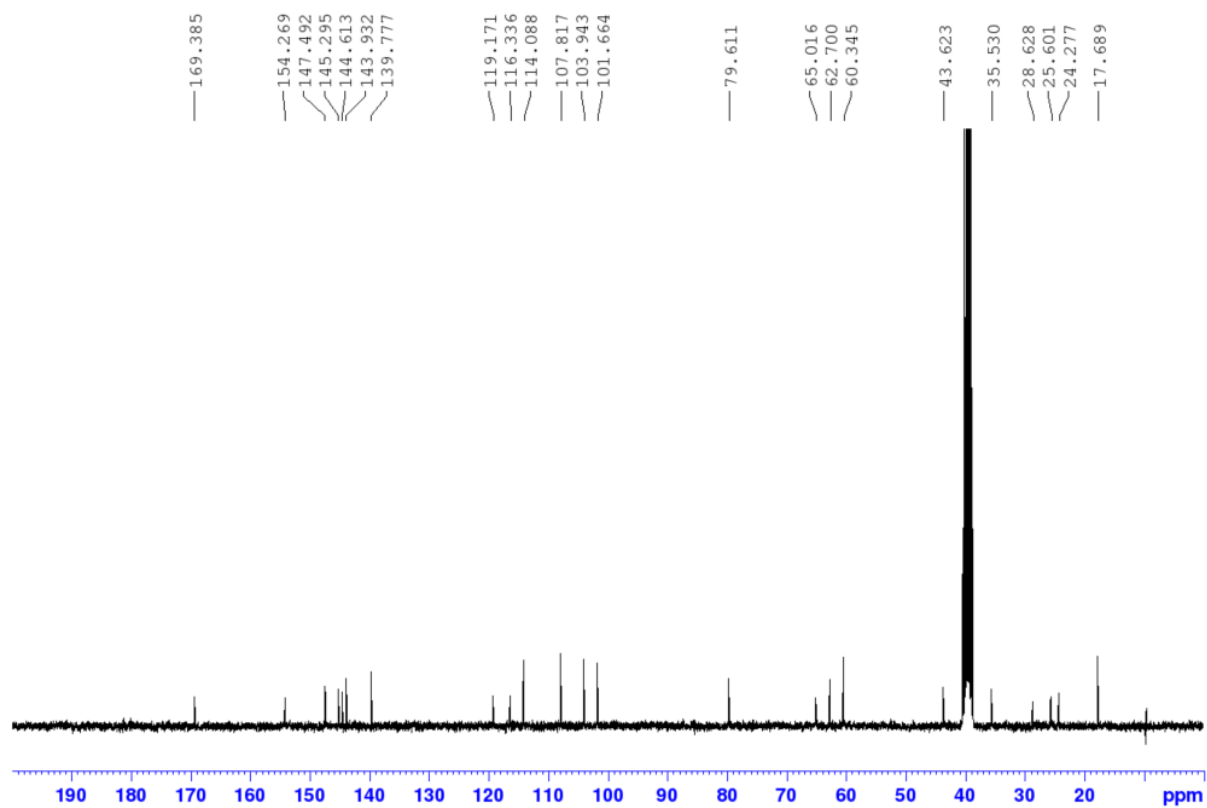



2-methoxyethyl N-hydroxy-N-[(1S,2S,4R,7R,11S)-4-methyl-8,12-dimethylene-13-oxo-3,14-dioxatricyclo[9.3.0.02,4]tetradecan-7-yl]carbamate (**21**)

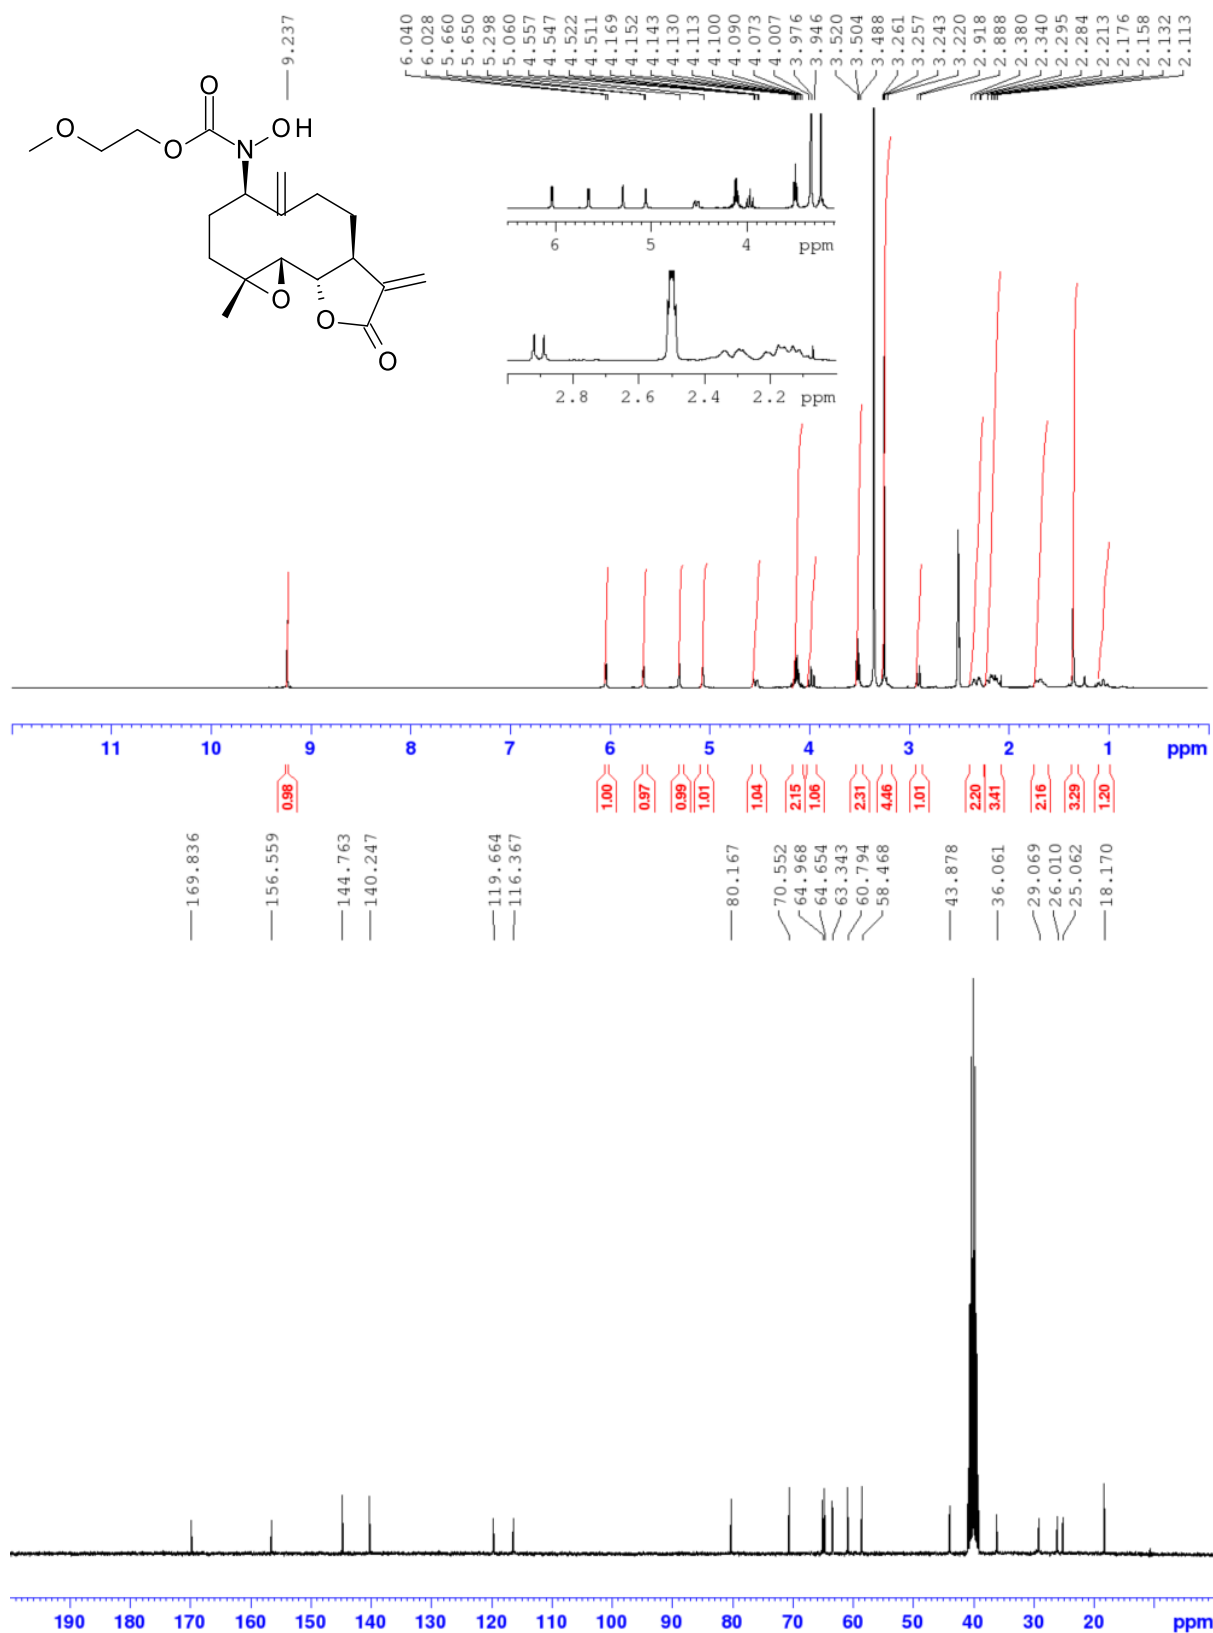

Chemical structure of compound 10 is shown. The <sup>1</sup>H NMR spectrum (400 MHz, CDCl<sub>3</sub>) is displayed at the top, and the <sup>13</sup>C NMR spectrum (100 MHz, CDCl<sub>3</sub>) is displayed at the bottom.

**<sup>1</sup>H NMR (400 MHz, CDCl<sub>3</sub>) peaks (ppm):**

- 9.190, 6.039, 6.028, 5.658, 5.648, 5.293, 5.064, 4.746, 4.739, 4.732, 4.719, 4.550, 4.540, 4.514, 4.505, 4.004, 3.974, 3.943, 3.809, 3.790, 3.772, 3.467, 3.457, 3.435, 3.427, 3.419, 3.396, 3.387, 3.276, 2.919, 2.889, 2.846, 2.299, 2.276, 2.270, 2.208, 2.179, 2.155, 2.139, 2.114, 1.871, 1.863, 1.830, 1.821, 1.723, 1.711, 1.687, 1.673, 1.648, 1.570, 1.553, 1.539, 1.523, 1.509, 1.496, 1.343, 1.101, 1.052.

**<sup>13</sup>C NMR (100 MHz, CDCl<sub>3</sub>) peaks (ppm):**

- 169.836, 156.559, 144.763, 140.247, 119.664, 116.367, 80.167, 70.552, 64.968, 64.654, 63.343, 60.794, 58.468, 43.878, 36.061, 29.069, 26.010, 25.062, 18.170.

(1S,2S,4R,7Z,11S)-7-hydroxyimino-4-methyl-8,12-dimethylene-3,14-dioxatricyclo[9.3.0.0<sup>2,4</sup>],  
tetradecan-13-one (**23**)

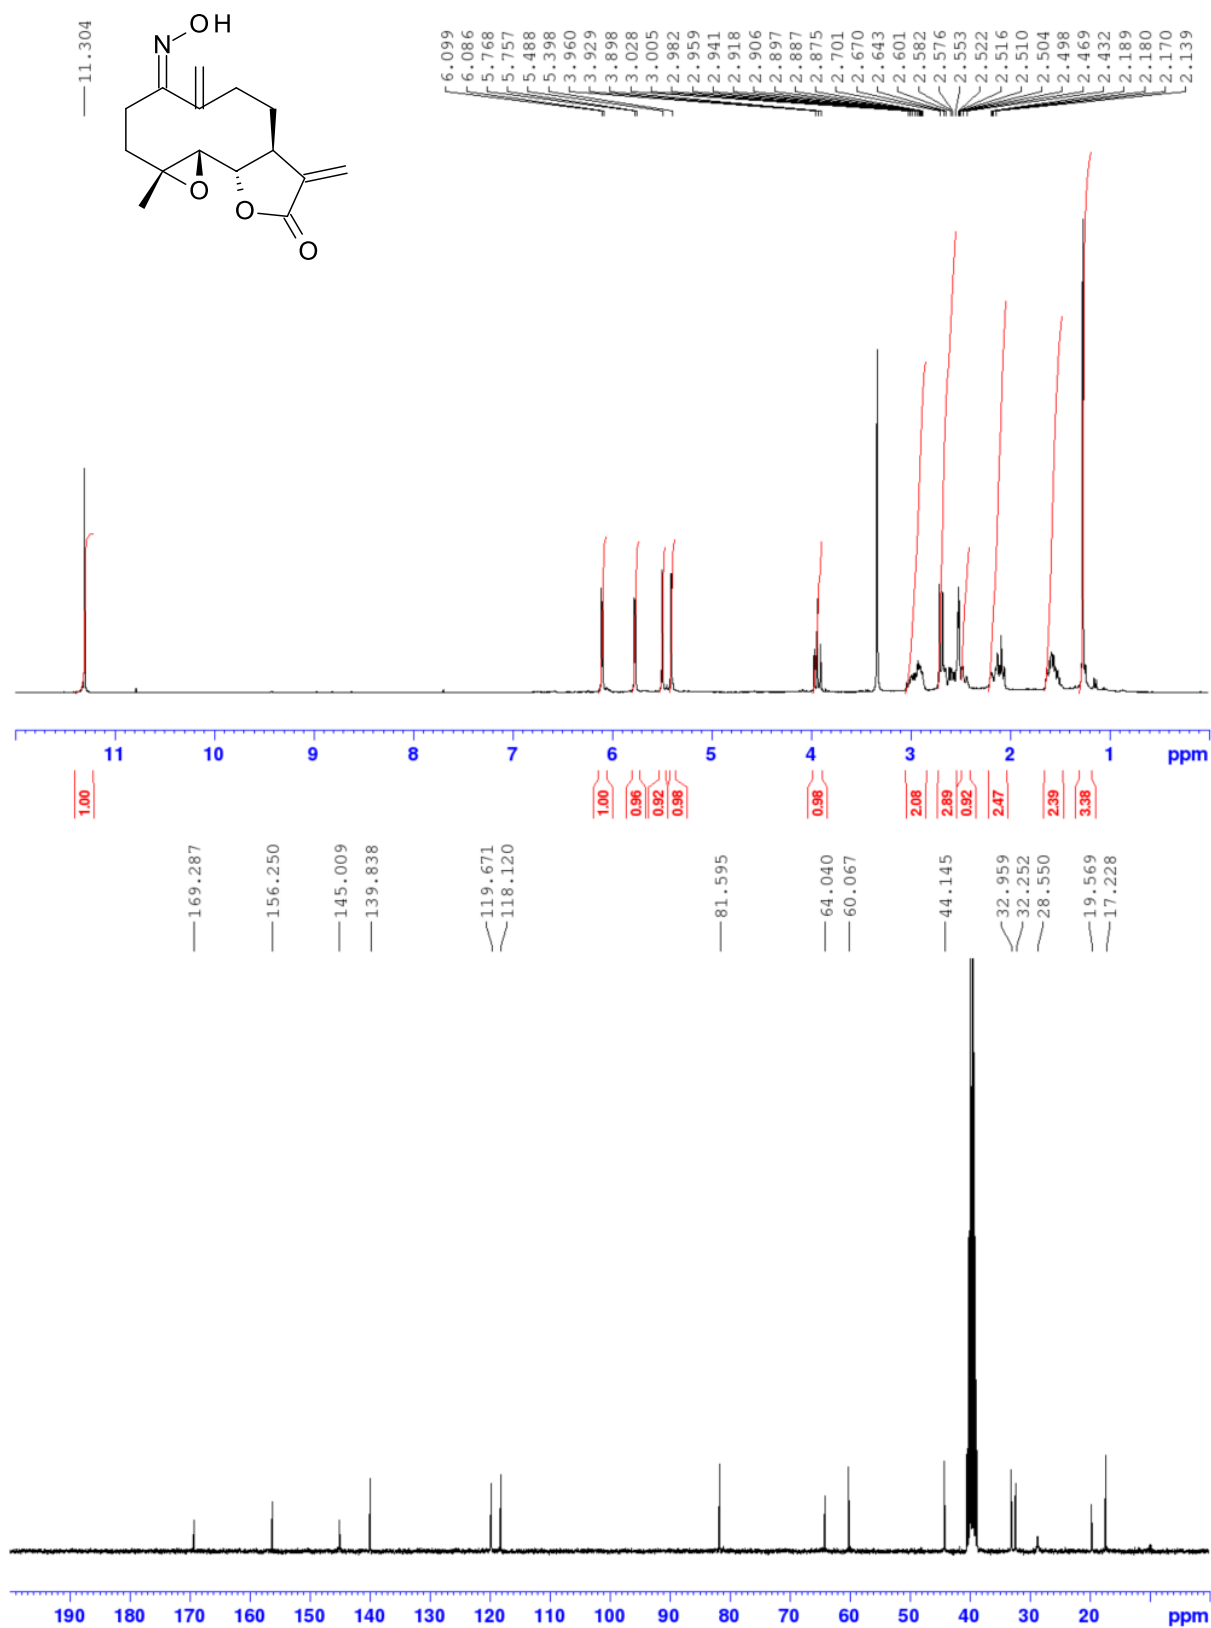

(1S,2S,4R,7E,11S)-4,8,12-trimethyl-3,14-dioxatricyclo[9.3.0.0<sup>2,4</sup>]tetradec-7-en-13-one (**26**)

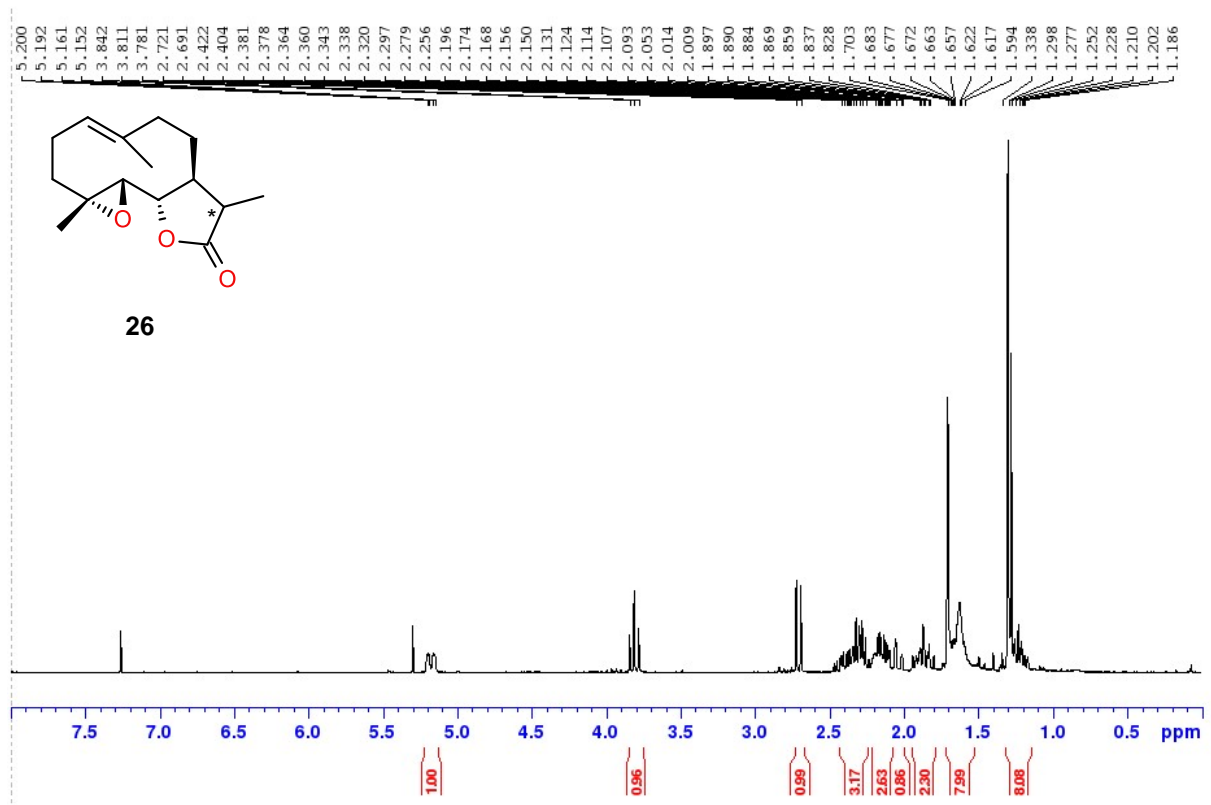

- [1] N-Sulfonyloxy Carbamates as Reoxidants for the Tethered Aminohydroxylation Reaction n.d. <https://doi.org/10.1021/ja057389g>.
- [2] Iron-Catalyzed Arene C–H Amidation Using Functionalized Hydroxyl Amines at Room Temperature n.d. <https://doi.org/10.1021/acscatal.8b02939>.
- [3] Beier P, Mindl J, Štěrbá V, Hanusek J. Kinetics and mechanism of base-catalysed degradations of substituted aryl-N-hydroxycarbamates, their N-methyl and N-phenyl analogues. *Org Biomol Chem* 2004;2:562–9. <https://doi.org/10.1039/B310454K>.
- [4] Alkyl 4-Chlorobenzoyloxycarbamates as Highly Effective Nitrogen Source Reagents for the Base-Free, Intermolecular Aminohydroxylation Reaction n.d. <https://doi.org/10.1021/jo1018816>.
